# Supplementary material for: Self-management interventions for adults living with obesity to improve patient-relevant outcomes: An evidence map
Source: PubMed Central journal article supplement — Patient Educ Couns. 2023 May;110:107647. doi: 10.1016/j.pec.2023.107647 (PMC10109091; doi:10.1016/j.pec.2023.107647), 2023-05
Supplement: mmc1.pdf [file mmc1.pdf]

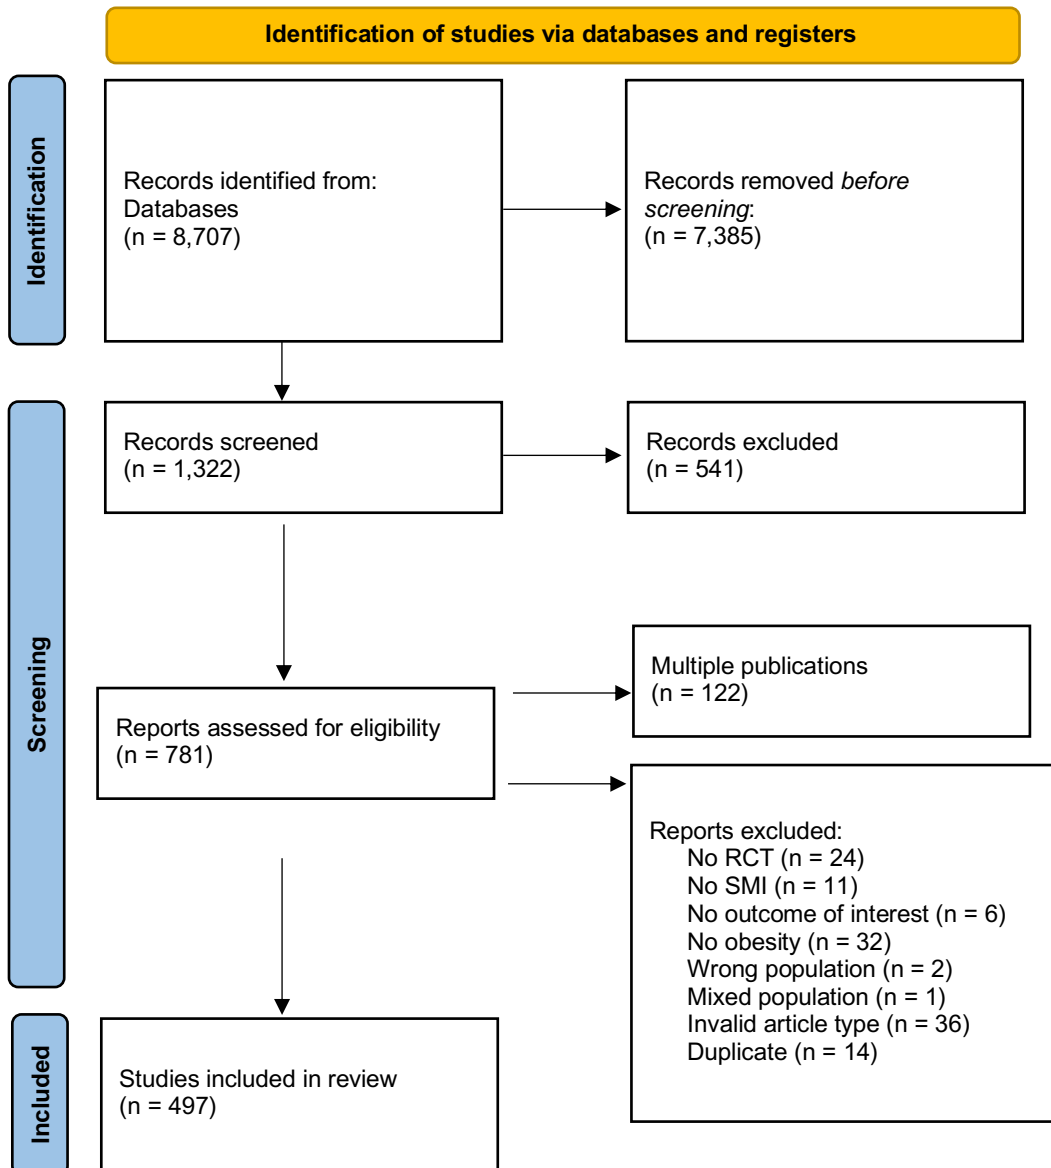

From: Page MJ, McKenzie JE, Bossuyt PM, Boutron I, Hoffmann TC, Mulrow CD, et al. The PRISMA 2020 statement: an updated guideline for reporting systematic reviews. *BMJ* 2021;372:n71. doi: 10.1136/bmj.n71

For more information, visit: <http://www.prisma-statement.org/>
