# Supplementary material for: Self-management interventions for adults living with obesity to improve patient-relevant outcomes: An evidence map
Source: PubMed Central journal article supplement — Patient Educ Couns. 2023 May;110:107647. doi: 10.1016/j.pec.2023.107647 (PMC10109091; doi:10.1016/j.pec.2023.107647), 2023-05
Supplement: mmc4.pdf [file mmc4.pdf]

**Table S3.** Excluded studies and reasons for exclusion

| <b>First author</b> | <b>Year</b> | <b>Title</b>                                                                                                                                                                           | <b>Reason for exclusion</b> |
|---------------------|-------------|----------------------------------------------------------------------------------------------------------------------------------------------------------------------------------------|-----------------------------|
| Yoo                 | 2010        | Difference of body compositional changes according to the presence of weight cycling in a community-based weight control program                                                       | No RCT                      |
| Yáziǵi              | 2013        | The PICO project: Aquatic exercise for knee osteoarthritis in overweight and obese individuals                                                                                         | Invalide article type       |
| Xu                  | 2013        | Effects of lifestyle intervention and meal replacement on glycaemic and body-weight control in Chinese subjects with impaired glucose regulation: a 1-year randomised controlled trial | Not obesity                 |
| Landry              | 2017        | Mississippi Communities for Healthy Living: Results of a 6-Month Nutrition Education Comparative Effectiveness Trial                                                                   | Not obesity                 |
| Gallagher           | 2006        | Psychosocial factors related to physical activity and weight loss in overweight women                                                                                                  | No RCT                      |
| Hornbuckle          | 2012        | Effects of resistance training and walking on cardiovascular disease risk in African-American women                                                                                    | Not obesity                 |
| Frank               | 2015        | An Integrated Risk Reduction Intervention can reduce body mass index in individuals being treated for bipolar I disorder: results from a randomized trial                              | No outcome of interest      |
| deZwaan             | 2012        | INTERBED: internet-based guided self-help for overweight and obese patients with full or subsyndromal binge eating disorder. A multicenter randomized controlled trial                 | Invalide article type       |
| Brintz              | 2017        | Sedentary behavior associations with cardiometabolic risk and depressive symptoms in overweight/obese type 2 diabetics: Results from the CALM-D trial                                  | Invalide article type       |
| Bennett             | 2015        | Satisfaction with primary care provider involvement is associated with greater weight loss: Results from the practice-based POWER trial                                                | No outcome of interest      |

|                 |      |                                                                                                                                                                        |                       |
|-----------------|------|------------------------------------------------------------------------------------------------------------------------------------------------------------------------|-----------------------|
| Russo           | 2018 | An intensive lifestyle intervention reduces circulating oxidised low-density lipoprotein and increases human paraoxonase activity in obese subjects                    | No RCT                |
| Vivian          | 2014 | Effects of a nursing intervention on cardiovascular health in hypertensive, dyslipidemic and overweight postmenopausal women                                           | Invalide article type |
| Toro-Ramos      | 2017 | Effectiveness of a Smartphone Application for the Management of Metabolic Syndrome Components Focusing on Weight Loss: A Preliminary Study                             | No RCT                |
| Roessler        | 2013 | Effects of exercise and group counselling on body composition and VO 2max in overweight women with polycystic ovary syndrome                                           | Not obesity           |
| Thomas          | 2015 | Behavioral response to a just-in-time adaptive intervention (JITAI) to reduce sedentary behavior in obese adults: Implications for JITAI optimization                  | No RCT                |
| Thompson        | 2014 | Increasing physician activity with treadmill desks                                                                                                                     | Wrong population      |
| Vasquez         | 2018 | Lessons from Singapore's national weight management program, Lose To Win                                                                                               | No RCT                |
| Waters          | 2013 | Long-term maintenance of weight loss after lifestyle intervention in frail, obese older adults                                                                         | No RCT                |
| Vesco           | 2014 | Efficacy of a group-based dietary intervention for limiting gestational weight gain among obese women: A randomized trial                                              | Wrong population      |
| Romero-Moraleda | 2015 | Lipid profile response to weight loss program in overweight and obese patient is related with gender and age                                                           | No SMI                |
| VanOers         | 2014 | Cost-effectiveness of a structured lifestyle program in overweight and obese subfertile women. Preliminary data from a randomised controlled trial-the LIFEstyle study | Invalide article type |
| Yin             | 2014 | Effectiveness of knowledge-based interventions for promoting healthy eating and physical activity among women in Beijing, China: a quasi-randomized controlled trial   | Invalide article type |

|                   |      |                                                                                                                                                                            |                       |
|-------------------|------|----------------------------------------------------------------------------------------------------------------------------------------------------------------------------|-----------------------|
| Wallia            | 2014 | Culturally adapting the prevention of diabetes and obesity in South Asians (PODOSA) trial                                                                                  | Invalide article type |
| Kucio             | 2017 | The application of Nordic walking in the treatment hypertension and obesity                                                                                                | No RCT                |
| Marchesi          | 2015 | Road Running After Gastric Bypass for Morbid Obesity: Rationale and Results of a New Protocol                                                                              | No RCT                |
| Martínez-González | 2014 | Obesity indexes and total mortality among elderly subjects at high cardiovascular risk: The PREDIMED study                                                                 | Not obesity           |
| Nanditha          | 2016 | Impact of lifestyle intervention in primary prevention of Type 2 diabetes did not differ by baseline age and BMI among Asian-Indian people with impaired glucose tolerance | Not obesity           |
| Watanabe          | 2017 | Effects of a lifestyle modification programme to reduce the number of risk factors for metabolic syndrome: a randomised controlled trial                                   | Not obesity           |
| Wilbur            | 2008 | Outcomes of a home-based walking program for African-American women                                                                                                        | No RCT                |
| Whited            | 2016 | Obstructive sleep apnea and weight loss treatment outcome among adults with metabolic syndrome                                                                             | No RCT                |
| Unick             | 2014 | Evaluation of early weight loss thresholds for identifying nonresponders to an intensive lifestyle intervention                                                            | No RCT                |
| vanStralen        | 2010 | Exploring the efficacy and moderators of two computer-tailored physical activity interventions for older adults: a randomized controlled trial                             | Not obesity           |
| Wasenius          | 2014 | The effect of structured exercise intervention on intensity and volume of total physical activity                                                                          | No SMI                |
| TarragaMarcos     | 2017 | Analysis of clinical relevance applied to 3 methods of reducing weight in overweight or obesity followed-up for one year                                                   | Invalide article type |
| Stillman          | 2018 | Weight-Loss Outcomes from a Pilot Study of African Dance in Older African Americans                                                                                        | Not obesity           |

|                 |      |                                                                                                                                 |                       |
|-----------------|------|---------------------------------------------------------------------------------------------------------------------------------|-----------------------|
| Stomby          | 2015 | Diet-induced weight loss has chronic tissue-specific effects on glucocorticoid metabolism in overweight postmenopausal women    | No SMI                |
| Zoellner        | 2013 | Randomized controlled trial targeting obesity-related behaviors: Better Together Healthy Caswell County                         | Not obesity           |
| Takada          | 2011 | 'The relationship between weight loss and time and risk preference parameters: A randomized controlled trial': Erratum          | Invalide article type |
| Swoboda         | 2018 | Multiple behavior change using goal setting, decision support, and motivational interviewing for type 2 diabetes                | Invalide article type |
| McGorrian       | 2015 | Erratum to 'BMI change in Australian cardiac rehabilitation patients: Cookery skills intervention versus written information    | Invalide article type |
| LaCaille        | 2016 | Go!: results from a quasi-experimental obesity prevention trial with hospital employees                                         | No RCT                |
| Kuller          | 2001 | Women's healthy lifestyle project: A randomized clinical trial: Results at 54 months                                            | Not obesity           |
| Mensink         | 2003 | Lifestyle intervention according to general recommendations improves glucose tolerance                                          | Not obesity           |
| Kolodziejczyk   | 2013 | Feasibility and effectiveness of an automated bilingual text message intervention for weight loss: pilot study                  | No RCT                |
| Katterman       | 2014 | Efficacy of an acceptance-based behavioral intervention for weight gain prevention in young adult women                         | Not obesity           |
| Kattelman       | 2014 | The effects of Young Adults Eating and Active for Health (YEAH): a theory-based Web-delivered intervention                      | Not obesity           |
| Reyes-Rodriguez | 2016 | "Las penas con pan duelen menos": The role of food and culture in Latinas with disordered eating behaviors                      | No RCT                |
| Jahangiry       | 2015 | Interactive web-based lifestyle intervention and metabolic syndrome: Findings from the Red Ruby (a randomized controlled trial) | Not obesity           |

|               |      |                                                                                                                                                                                                                                                                                          |                       |
|---------------|------|------------------------------------------------------------------------------------------------------------------------------------------------------------------------------------------------------------------------------------------------------------------------------------------|-----------------------|
| Huang         | 2013 | Benefits of different intensity of aerobic exercise training in modulating the anthropometric indexes of obese college students                                                                                                                                                          | Invalide article type |
| GokeeLaRose   | 2010 | Preventing Weight Gain in Young Adults. A Randomized Controlled Pilot Study                                                                                                                                                                                                              | Not obesity           |
| Fisher        | 2012 | Aerobic exercise training conserves insulin sensitivity for 1 yr following weight loss in overweight women                                                                                                                                                                               | No SMI                |
| Dunn          | 2014 | Using synchronous distance-education technology to deliver a weight management intervention                                                                                                                                                                                              | Not obesity           |
| deRezende     | 2016 | One-Year Results of an Educational Program on Osteoarthritis: A Prospective Randomized Controlled Trial in Brazil                                                                                                                                                                        | Not obesity           |
| Cramer        | 2016 | Yoga in Women With Abdominal Obesitya Randomized Controlled Trial                                                                                                                                                                                                                        | No SMI                |
| Chaudhary     | 2010 | The effects of aerobic versus resistance training on cardiovascular fitness in obese sedentary females                                                                                                                                                                                   | No SMI                |
| Biddle        | 2011 | Randomised controlled trial of informal team sports for cardiorespiratory fitness and health benefit in Pacific adults                                                                                                                                                                   | Not obesity           |
| Álvarez-Pérez | 2016 | Influence of a Mediterranean Dietary Pattern on Body Fat Distribution: Results of the PREDIMED–Canarias Intervention Randomized Trial                                                                                                                                                    | Not obesity           |
| Rosas         | 2018 | HOMBRE: A randomized controlled trial to compare two approaches to weight loss for overweight and obese Latino men (Hombres con Opciones para Mejorar el Bienestar y bajar el Riesgo de Enfermedades cronicas; men with choices to improve well-being and decrease chronic disease risk) | Invalide article type |
| Petrella      | 2014 | Mobile health, exercise and metabolic risk: a randomized controlled trial                                                                                                                                                                                                                | Not obesity           |
| Pekmezi       | 2018 | Physical Activity Maintenance Following Home-Based, Individually Tailored Print Interventions for African American Women                                                                                                                                                                 | Not obesity           |

|             |      |                                                                                                                                                                                                                                  |                        |
|-------------|------|----------------------------------------------------------------------------------------------------------------------------------------------------------------------------------------------------------------------------------|------------------------|
| Martin      | 2015 | mActive: A randomized clinical trial of an automated mHealth intervention for physical activity promotion                                                                                                                        | Not obesity            |
| Mandal      | 2018 | Nutrition and Exercise Rehabilitation in Obesity hypoventilation syndrome (NERO): a pilot randomised controlled trial                                                                                                            | Invalide article type  |
| Lombard     | 2016 | Preventing weight gain in women across multiple settings and lifestages: heLP-her cluster randomised controlled trials                                                                                                           | Invalide article type  |
| Lanzi       | 2015 | Short-term HIIT and Fat max training increase aerobic and metabolic fitness in men with class II and III obesity                                                                                                                 | No SMI                 |
| Napoli      | 2014 | Effect of weight loss, exercise, or both on cognition and quality of life in obese older adults                                                                                                                                  | No RCT                 |
| Lee         | 2018 | Mobile health, physical activity, and obesity: Subanalysis of a randomized controlled trial                                                                                                                                      | No RCT                 |
| Lappalainen | 2014 | The effectiveness and applicability of different lifestyle interventions for enhancing wellbeing: the study design for a randomized controlled trial for persons with metabolic syndrome risk factors and psychological distress | Invalide article type  |
| Laitner     | 2016 | The role of self-monitoring in the maintenance of weight loss success                                                                                                                                                            | No RCT                 |
| Janke       | 2014 | A randomized clinical trial of an integrated behavioral self-management intervention Simultaneously Targeting Obesity and Pain: the STOP trial                                                                                   | Invalide article type  |
| Jabbour     | 2017 | Effect of supramaximal exercise training on metabolic outcomes in obese adults                                                                                                                                                   | No SMI                 |
| Oddone      | 2017 | Evaluation of a coaching by telephone intervention for veterans and care team engagement (activate)                                                                                                                              | Invalide article type  |
| Lombard     | 2014 | Effectiveness and implementation of an obesity prevention intervention: the HeLP-her Rural cluster randomised controlled trial                                                                                                   | Invalide article type  |
| Kozica      | 2015 | Acceptability of delivery modes for lifestyle advice in a large scale randomised controlled obesity prevention trial                                                                                                             | No outcome of interest |

|            |      |                                                                                                                                                                                                           |                       |
|------------|------|-----------------------------------------------------------------------------------------------------------------------------------------------------------------------------------------------------------|-----------------------|
| Heinrich   | 2014 | High-intensity compared to moderate-intensity training for exercise initiation, enjoyment, adherence, and intentions: an intervention study                                                               | No SMI                |
| Potts      | 2018 | Putting weight in context: Acceptance and Commitment Therapy (ACT) guided self-help for weight self-stigma                                                                                                | Invalide article type |
| Madigan    | 2014 | The efficacy of self-weighing as a standalone weight loss intervention: randomised controlled trial (SCALE DOWN)                                                                                          | Invalide article type |
| Lawrence   | 2015 | Training response inhibition to food is associated with weight loss and reduced energy intake                                                                                                             | Not obesity           |
| LaRose     | 2014 | Daily self-weighing within a lifestyle intervention: impact on disordered eating symptoms                                                                                                                 | No RCT                |
| Lanzi      | 2014 | Effects of 2-week endurance training in severe obese men: high intensity interval versus Fatmax training                                                                                                  | Invalide article type |
| Kroeger    | 2017 | Alternate day fasting versus calorie restriction for weight maintenance                                                                                                                                   | Invalide article type |
| Khodaveisi | 2017 | The Effect of Pender's Health Promotion Model in Improving the Nutritional Behavior of Overweight and Obese Women                                                                                         | Invalide article type |
| Kegler     | 2017 | Home environments, physical activity, and energy expenditure among low-income overweight and obese women                                                                                                  | No RCT                |
| Hunnemeyer | 2011 | The base for a balanced life - The randomized controlled base (bariatric surgery and education) study                                                                                                     | Invalide article type |
| Hillier    | 2012 | A community-based health promotion intervention using brief negotiation techniques and a pledge on dietary intake, physical activity levels and weight outcomes: lessons learnt from an exploratory trial | Not obesity           |
| Hedayati   | 2017 | Comparing the effects of whole body vibration with and without exercise on body composition in healthy adults                                                                                             | Invalide article type |

|                |      |                                                                                                                                                                                                                                                 |                      |
|----------------|------|-------------------------------------------------------------------------------------------------------------------------------------------------------------------------------------------------------------------------------------------------|----------------------|
| Foley          | 2012 | Weight gain prevention among black women in the rural community health center setting: the Shape Program                                                                                                                                        | Invalid article type |
| Wang           | 2018 | A Behavioral Lifestyle Intervention Enhanced With Multiple-Behavior Self-Monitoring Using Mobile and Connected Tools for Underserved Individuals With Type 2 Diabetes and Comorbid Overweight or Obesity: Pilot Comparative Effectiveness Trial | Duplicate            |
| Teychenne      | 2015 | Adoption and maintenance of gym-based strength training in the community setting in adults with excess weight or type 2 diabetes: a randomized controlled trial                                                                                 | Duplicate            |
| Sorkin         | 2014 | Dyadic collaboration in shared health behavior change: the effects of a randomized trial to test a lifestyle intervention for high-risk Latinas                                                                                                 | Duplicate            |
| Rubin          | 2014 | Impact of intensive lifestyle intervention on depression and health-related quality of life in type 2 diabetes: the Look AHEAD Trial                                                                                                            | Duplicate            |
| Rock           | 2014 | Weight loss, glycemic control, and cardiovascular disease risk factors in response to differential diet composition in a weight loss program in type 2 diabetes: a randomized controlled trial                                                  | Duplicate            |
| Osama          | 2015 | Psychological wellbeing and biochemical modulation in response to weight loss in obese type 2 diabetes patients                                                                                                                                 | Duplicate            |
| Lutes          | 2018 | COMRADE: A randomized trial of an individually tailored integrated care intervention for uncontrolled type 2 diabetes with depression and/or distress in the rural southeastern US                                                              | Duplicate            |
| Houston        | 2015 | A long-term intensive lifestyle intervention and physical function: the look AHEAD Movement and Memory Study                                                                                                                                    | Duplicate            |
| Holland-Carter | 2017 | Impact on psychosocial outcomes of a nationally available weight management program tailored for individuals with type 2 diabetes: Results of a randomized controlled trial                                                                     | Duplicate            |
| Hansel         | 2017 | A Fully Automated Web-Based Program Improves Lifestyle Habits and HbA1c in Patients With Type 2 Diabetes and Abdominal Obesity:                                                                                                                 | Duplicate            |



|           |      |                                                                                                                                                                             |                      |
|-----------|------|-----------------------------------------------------------------------------------------------------------------------------------------------------------------------------|----------------------|
|           |      | Randomized Trial of Patient E-Coaching Nutritional Support (The ANODE Study)                                                                                                |                      |
| Grande    | 2017 | Community health worker support versus collaborative goal-setting for disadvantaged patients with multiple chronic diseases: a randomized clinical trial                    | Not obesity          |
| Espeland  | 2014 | Impact of an intensive lifestyle intervention on use and cost of medical services among overweight and obese adults with type 2 diabetes: The action for health in diabetes | Duplicate            |
| Jiang     | 2017 | The effect of care intervention for obese patients with type II diabetes                                                                                                    | Duplicate            |
| Gibbs     | 2014 | Effect of improved fitness beyond weight loss on cardiovascular risk factors in individuals with type 2 diabetes in the Look AHEAD study                                    | Duplicate            |
| Goode     | 2018 | The feasibility of a binge eating intervention in African-American women who are overweight or obese                                                                        | Invalid article type |
| Goode     | 2017 | Feasibility of an appetite awareness intervention to reduce cardiovascular disease risk factors and binge eating in African-American women with obesity                     | Invalid article type |
| Ghavami   | 2015 | Effects of lifestyle interventions on body mass index in breast cancer patients                                                                                             | Invalid article type |
| French    | 2011 | Household obesity prevention: Take actiona group-randomized trial                                                                                                           | Not obesity          |
| Fernandez | 2015 | Images of a Healthy Worksite: A Group-Randomized Trial for Worksite Weight Gain Prevention With Employee Participation in Intervention Design                               | Not obesity          |
| Ferentzi  | 2018 | Retraining of automatic action tendencies in individuals with obesity: A randomized controlled trial                                                                        | No RCT               |
| Esmaeili  | 2014 | A Randomized Trial on the Effect of Razavi's Dietary Pattern on the Components of Metabolic Syndrome                                                                        | Not obesity          |

|            |      |                                                                                                                                                                        |                       |
|------------|------|------------------------------------------------------------------------------------------------------------------------------------------------------------------------|-----------------------|
| Eaglehouse | 2016 | Physical Activity Levels in a Community Lifestyle Intervention: A Randomized Trial                                                                                     | Mixed population      |
| Duncan     | 2016 | Family-centered brief intervention for reducing obesity and cardiovascular disease risk: A randomized controlled trial                                                 | Not obesity           |
| Choi       | 2015 | The effects of the DASH diet education program with omega-3 fatty acid supplementation on metabolic syndrome parameters in elderly women with abdominal obesity        | Not obesity           |
| Chasapidou | 2014 | A mediterranean-type nutrition intervention program in greek municipalities for patients with cardiometabolic diseases (food 4health study)                            | Invalide article type |
| Carter     | 2015 | Frequency of electronic dietary self monitoring using a smartphone app and weight loss                                                                                 | Invalide article type |
| Braxton    | 2017 | Design and testing of a behavioral weight loss program for African American women who are severely obese                                                               | Invalide article type |
| Bozzetto   | 2014 | A CHO/fibre diet reduces and a MUFA diet increases postprandial lipaemia in type 2 diabetes: no supplementary effects of low-volume physical training                  | No SMI                |
| Blomquist  | 2011 | Predictive significance of changes in dietary restraint in obese patients with binge eating disorder during treatment                                                  | No SMI                |
| Bender     | 2017 | A feasible and effective mobile health weight loss lifestyle intervention for filipinos with type 2 diabetes                                                           | Invalide article type |
| Beeken     | 2015 | Piloting a manualised weight management programme for overweight and obese persons with mild-moderate learning disabilities: results of the shape up-LD study          | Invalide article type |
| Annesi     | 2015 | Theory-based psychosocial factors that discriminate between weight-loss success and failure over 6 months in women with morbid obesity receiving behavioral treatments | No RCT                |
| Allet      | 2014 | Dance Therapy-its effect on quality of life, and functional capactiy                                                                                                   | Invalide article type |

|             |      |                                                                                                                                                         |                        |
|-------------|------|---------------------------------------------------------------------------------------------------------------------------------------------------------|------------------------|
| Fitzpatrick | 2014 | Examining behavioral processes through which lifestyle interventions promote weight loss: results from PREMIER                                          | No RCT                 |
| Assaf       | 2016 | Low-Fat Dietary Pattern Intervention and Health-Related Quality of Life: The Women's Health Initiative Randomized Controlled Dietary Modification Trial | Not obesity            |
| Breyer      | 2014 | Intensive lifestyle intervention reduces urinary incontinence in overweight/obese men with type 2 diabetes: Results from the look AHEAD trial           | No outcome of interest |
| Espeland    | 2014 | Long-term impact of behavioral weight loss intervention on cognitive function                                                                           | No outcome of interest |
| Ahrendt     | 2014 | The Effectiveness of Telemedicine for Weight Management in the MOVE! Program                                                                            | No RCT                 |
| AbdEl-Kader | 2015 | Aerobic exercises alleviate symptoms of fatigue related to inflammatory cytokines in obese patients with type 2 diabetes                                | No outcome of interest |
