# Supplementary material for: Self-management interventions for adults living with obesity to improve patient-relevant outcomes: An evidence map
Source: PubMed Central journal article supplement — Patient Educ Couns. 2023 May;110:107647. doi: 10.1016/j.pec.2023.107647 (PMC10109091; doi:10.1016/j.pec.2023.107647), 2023-05
Supplement: mmc5.pdf [file mmc5.pdf]

**Table S4. Key characteristics of the included studies**

| <b>Author, year (reference)</b>                | <b>Country</b> | <b>Type of comparison</b>   | <b>Participant n (%F)</b> | <b>Age, mean (SD)</b> | <b>Follow-up (months)</b> | <b>BMI, mean (SD)</b> | <b>Focus on other comorbidities OR other comorbidities as inclusion criteria; type of comorbidity</b> | <b>Interventions (as named by authors)</b>                                   | <b>Outcomes</b>                                       |
|------------------------------------------------|----------------|-----------------------------|---------------------------|-----------------------|---------------------------|-----------------------|-------------------------------------------------------------------------------------------------------|------------------------------------------------------------------------------|-------------------------------------------------------|
| Ackermann, 2011 (10.1177/1742395311407532.)    | US             | Intervention vs usual care* | 509 (71)                  | 58 (10)               | 12                        | 31 (5)                | Other focus: no<br>Inclusion criteria: no<br>Comorbidity: other                                       | I1: Usual care<br>I2: Diabetes prevention program                            | SBP                                                   |
| Kim, 2014 (10.1111/cen.12249.)                 | KR             | Intervention vs usual care  | 205 (0)                   | 48 (8)                | 6                         | 28 (3)                | Other focus: yes<br>Inclusion criteria: no<br>Comorbidity: other                                      | I1: Usual care<br>I2: Lifestyle Modification Intervention                    | F consum.; CHO; Fb consum.; BF; BMI; Wt; WC; SBP; DBP |
| Koo, 2010 (10.1111/j.1464-5491.2010.03045.x.)  | KR             | Intervention vs usual care  | 64 (100)                  | 56 (8)                | 3                         | 28 (3)                | Other focus: yes<br>Inclusion criteria: yes<br>Comorbidity: other                                     | I1: Usual care<br>I2: Diet<br>I3: Exercise<br>I4: Diet plus Exercise         | CHO; PA; PAEE; BF; Wt                                 |
| Labrunee, 2012 (10.1016/j.rehab.2012.06.001.)  | FR             | Intervention vs usual care  | 23 (44)                   | 53 (8)                | 3                         | 40 (9)                | Other focus: yes<br>Inclusion criteria: yes<br>Comorbidity: other                                     | I1: Usual care<br>I2: Home-based rehabilitation program                      | PA; BMI; Wt                                           |
| Pedersen, 2007 (10.1001/archinte.167.12.1277.) | CA             | Intervention vs usual care  | 130 (59)                  | 56 (10)               | 6                         | 39 (6)                | Other focus: yes<br>Inclusion criteria: yes<br>Comorbidity: other                                     | I1: Usual care<br>I2: Portion control plate                                  | Wt; SBP; DBP                                          |
| Espeland, 2007 (10.1111/jgs.14692.)            | US             | Head-to-head intervention   | 5,145 (59)                | 59 (7)                | 48                        | 36 (6)                | Other focus: yes<br>Inclusion criteria: yes<br>Comorbidity: other                                     | I1: Diabetes support and education<br>I2: Intensive weight loss intervention | PA; Wt                                                |

|                                                    |    |                                  |            |            |    |        |                                                                         |                                                                                                                     |                                                          |
|----------------------------------------------------|----|----------------------------------|------------|------------|----|--------|-------------------------------------------------------------------------|---------------------------------------------------------------------------------------------------------------------|----------------------------------------------------------|
| Patja, K. 2012<br>(10.1186/1472-6963-12-147)       | FI | Intervention<br>vs usual care    | 1,129 (43) | 65 (9)     | 12 | 32 (6) | Other focus: yes<br>Inclusion criteria: yes<br>Comorbidity:<br>Diabetes | I1: Usual care<br>I2: Health coach                                                                                  | WC; SBP; DBP                                             |
| Miller, C. K. 2012<br>(10.1016/j.jand.2012.07.036) | US | Head-to-<br>head<br>intervention | 52 (64)    | 54 (8)     | 3  | 36 (6) | Other focus: no<br>Inclusion criteria: no<br>Comorbidity: other         | I1: Mindfulness-<br>Based Eating<br>Awareness<br>Training for<br>Diabetes<br>I2: The Smart<br>Choices (             | DH; F consum.;<br>CHO; Fb<br>consum.; PA;<br>BMI; Wt; WC |
| Yoo 2009<br>(10.1111/j.1464-5491.2009.02732.x.)    | ZA | Intervention<br>vs usual care    | 123 (47)   | 58 (9)     | 3  | 26 (3) | Other focus: yes<br>Inclusion criteria: yes<br>Comorbidity: other       | I1: Usual care<br>I2: the Ubiquitous<br>Chronic Disease<br>Care system using<br>cellular phones<br>and the internet | BMI; Wt; WC;<br>DM                                       |
| Wolf 2004<br>(10.2337/diacare.27.7.1570.)          | US | Intervention<br>vs usual care    | 147 (60)   | 53 (8)     | 12 | 38 (7) | Other focus: yes<br>Inclusion criteria: yes<br>Comorbidity: other       | I1: Usual care<br>I2: Lifestyle case<br>management                                                                  | Wt; WC; DM                                               |
| West 2007<br>(10.2337/dc06-1966.)                  | US | Head-to-<br>head<br>intervention | 217 (100)  | 53<br>(10) | 18 | 37 (6) | Other focus: yes<br>Inclusion criteria: yes<br>Comorbidity: other       | I1: Group-based<br>behavioral weight<br>control program<br>I2: Motivational<br>interviewing                         | Wt                                                       |
| Wang 2018<br>(10.2196/mhealth.4478.)               | US | Intervention<br>vs usual care    | 26 (62)    | 56 (8)     | 6  | 38 (7) | Other focus: yes<br>Inclusion criteria: yes<br>Comorbidity: other       | I1: Usual care<br>I2: Mobile<br>I3: Paper                                                                           | Wt                                                       |
| Sorkin 2014<br>(10.1037/hea0000063.)               | US | Intervention<br>vs usual care    | 89 (100)   | 28 (7)     | 6  | 0 (0)  | Other focus: no<br>Inclusion criteria: no<br>Comorbidity: other         | I1: Usual care<br>I2: Dyad-based<br>lifestyle<br>intervention                                                       | F consum.; FV<br>consum.; Wt                             |

|                                                       |    |                                       |          |            |    |             |                                                                         |                                                                                                                             |                                                                |
|-------------------------------------------------------|----|---------------------------------------|----------|------------|----|-------------|-------------------------------------------------------------------------|-----------------------------------------------------------------------------------------------------------------------------|----------------------------------------------------------------|
| Samuel-Hodge 2009<br>(10.1177/0145721709<br>333270.)  | US | Head-to-<br>head<br>intervention<br>* | 201 (64) | 59<br>(11) | 12 | 35 (5)      | Other focus: yes<br>Inclusion criteria: yes<br>Comorbidity:<br>Diabetes | I1: Special<br>intervention<br>(church-based self-<br>management)<br>I2: Minimal<br>intervention                            | Fb consum.; FV<br>consum.; ACM;<br>PAI; Wt; SBP;<br>DBP; QoL   |
| Samuel-Hodge 2017<br>(10.1002/oby.21700. )            | US | Intervention<br>vs usual care         | 108 (37) | 54 (0)     | 5  | 38 (0)      | Other focus: yes<br>Inclusion criteria: yes<br>Comorbidity:<br>Diabetes | I1: Usual care<br>I2: weight loss<br>intervention                                                                           | FV consum.; PA;<br>BMI; Wt; SBP;<br>DBP; QoL; DEPR             |
| Rock 2014<br>(10.2337/dc13-2900.)                     | US | Intervention<br>vs usual care         | 227 (51) | 57 (9)     | 12 | 0 (0)       | Other focus: no<br>Inclusion criteria: no<br>Comorbidity: other         | I1: Usual care<br>I2: higher<br>carbohydrate,<br>lower fat diet plan;<br>I3: lower<br>carbohydrate,<br>higher fat diet plan | PA; BMI; Wt;<br>WC; SBP; DBP;<br>QoL                           |
| Plotnikoff 2010<br>(10.1038/ijo.2010.109.<br>)        | CA | Intervention<br>vs usual care         | 48 (67)  | 55<br>(12) | 4  | 36 (7)      | Other focus: yes<br>Inclusion criteria: yes<br>Comorbidity:<br>Diabetes | I1: Usual care<br>I2: Training group                                                                                        | SE; WHR; BMI;<br>Wt; WC; SBP;<br>DBP; QoL                      |
| O'Neil 2016<br>(10.1002/oby.21616.)                   | US | Intervention<br>vs usual care         | 563 (65) | 0 (0)      | 12 | 116<br>(14) | Other focus: yes<br>Inclusion criteria: yes<br>Comorbidity: other       | I1: Usual care<br>I2: Weight<br>watchers                                                                                    | Wt; WC; SBP;<br>DBP                                            |
| Mottalib 2018<br>(10.1186/s12937-018-<br>0351-0)      | US | Intervention<br>vs usual care         | 72 (39)  | 60<br>(10) | 4  | 35 (8)      | Other focus: yes<br>Inclusion criteria: yes<br>Comorbidity: other       | I1: Usual care<br>I2: Dietary plan<br>I3: Dietary plan +<br>patient-RDN<br>interaction                                      | F consum.; CHO;<br>Fb consum.; BF;<br>BMI; Wt; WC;<br>SBP; DBP |
| Moncrieft 2016<br>(10.1097/PSY.0000000<br>000000348.) | US | Intervention<br>vs usual care         | 79 (71)  | 55 (7)     | 12 | 33 (5)      | Other focus: yes<br>Inclusion criteria: yes<br>Comorbidity: other       | I1: Usual care<br>I2: Community<br>Approach to<br>Lifestyle                                                                 | Wt                                                             |

|                                                            |    |                            |           |         |    |        |                                                                   | Modification for Diabetes                                            |                                           |
|------------------------------------------------------------|----|----------------------------|-----------|---------|----|--------|-------------------------------------------------------------------|----------------------------------------------------------------------|-------------------------------------------|
| Lutes, LD 2018<br>(10.1016/j.cct.2018.04.007.)             | US | Intervention vs usual care | 108 (78)  | 54 (9)  | 12 | 37 (9) | Other focus: yes<br>Inclusion criteria: yes<br>Comorbidity: other | I1: Usual care<br>I2: Tailored care intervention                     | MA; Wt; SBP;<br>DEPR; S                   |
| Lutes, LD 2017<br>(10.1002/oby.21883.)                     | US | Head-to-head intervention  | 200 (100) | 53 (10) | nr | 38 (8) | Other focus: yes<br>Inclusion criteria: yes<br>Comorbidity: other | I1: Mail-based education group<br>I2: Small Changes Intervention     | Wt; SBP; DBP                              |
| Luley 2011<br>(10.1016/j.diabres.2010.11.020.)             | DE | Intervention vs usual care | 36 (51)   | 58 (8)  | 6  | 35 (6) | Other focus: yes<br>Inclusion criteria: yes<br>Comorbidity: other | I1: Usual care<br>I2: ABC Program                                    | BMI; Wt                                   |
| Jiang, X 2017<br>(10.1097/MD.00000000000007524.)           | CN | Intervention vs usual care | 61 (48)   | 57 (5)  | 12 | 33 (3) | Other focus: yes<br>Inclusion criteria: yes<br>Comorbidity: other | I1: Usual care<br>I2: Care intervention                              | WM; BMI                                   |
| Hansel 2017<br>(10.2196/jmir.7947.)                        | FR | Intervention vs usual care | 80 (67)   | 57 (9)  | nr | 33 (4) | Other focus: yes<br>Inclusion criteria: yes<br>Comorbidity: other | I1: Usual care<br>I2: Web-based nutritional support tool             | F consum.; Fb consum.; FV consum.; Wt; WC |
| Bender, M. S. 2017<br>(10.2196/diabetes.8156.)             | US | Head-to-head intervention  | 28 (62)   | 58 (10) | 3  | 30 (5) | Other focus: no<br>Inclusion criteria: no<br>Comorbidity: other   | I1: Usual care<br>I2: PilAm Go4Health intervention                   | TS; BMI; Wt; WC                           |
| Dallow, C. B. 2003<br>(10.4278/0890-1171-17.6.373)         | US | Intervention vs usual care | 29 (100)  | 47 (0)  | 6  | 36 (0) | Other focus: no<br>Inclusion criteria: no<br>Comorbidity: other   | I1: Usual care<br>I2: Lifestyle intervention group                   | ESES; PA                                  |
| Armenta Guirado, B. I. 2015<br>(10.3305/nh.2015.32.4.9366) | MX | Intervention vs usual care | 13 (62)   | 37 (9)  | 3  | 34 (3) | Other focus: no<br>Inclusion criteria: no<br>Comorbidity: other   | I1: Usual care<br>I2: Programa Intensivo de Cambio de Estilo de Vida | BF; BMI; Wt; WC; SBP; DBP                 |

|                                                                 |    |                                  |           |            |    |        |                                                                 |                                                                                                                  |                                           |
|-----------------------------------------------------------------|----|----------------------------------|-----------|------------|----|--------|-----------------------------------------------------------------|------------------------------------------------------------------------------------------------------------------|-------------------------------------------|
| Cussler, E. C. 2008<br>(10.1038/oby.2008.19)                    | US | Intervention<br>vs usual care    | 135 (100) | 48 (4)     | 12 | 31 (4) | Other focus: no<br>Inclusion criteria: no<br>Comorbidity: other | I1: Usual care<br>I2: Internet<br>contact group                                                                  | DH; PA; BMI; Wt                           |
| Miguel Soca, P. E.<br>2012<br>(10.1016/j.aprim.2011<br>.07.010) | CU | Intervention<br>vs usual care    | 150 (81)  | 55 (1)     | 12 | 33 (0) | Other focus: no<br>Inclusion criteria: no<br>Comorbidity: other | I1: Usual care<br>I2: Experimental<br>group                                                                      | BMI; Wt; WC;<br>SBP; DBP                  |
| Carels, R. A. 2017<br>(10.1177/1359105315<br>619690)            | US | Head-to-<br>head<br>intervention | 84 (86)   | 53<br>(12) | 4  | 36 (7) | Other focus: no<br>Inclusion criteria: no<br>Comorbidity: other | I1: Diabetes<br>prevention<br>program<br>I2: Transforming<br>your life program                                   | Wt                                        |
| Annesi, J. J. 2015<br>(10.1080/03630242.20<br>14.996727)        | US | Head-to-<br>head<br>intervention | 102 (100) | 43<br>(10) | 6  | 44 (3) | Other focus: no<br>Inclusion criteria: no<br>Comorbidity: other | I1: Nutrition<br>education<br>I2: Cognitive-<br>behavioral<br>nutrition group                                    | SE; ESE; cog.<br>DIS                      |
| Anton, S. D. 2011<br>(10.2147/cia.S17001)                       | US | Intervention<br>vs usual care    | 34 (100)  | 64 (5)     | 6  | 38 (6) | Other focus: no<br>Inclusion criteria: no<br>Comorbidity: other | I1: Usual care<br>I2: WL+E                                                                                       | Wt                                        |
| Appel, L. J. 2011<br>(10.1056/NEJMoa110<br>8660)                | US | Intervention<br>vs usual care    | 264 (64)  | 54<br>(10) | nr | 37 (5) | Other focus: no<br>Inclusion criteria: no<br>Comorbidity: other | I1: Usual care<br>I2: Remote<br>Support Only<br>I3: In-Person<br>Support                                         | BMI; Wt; WC;<br>SBP; DBP                  |
| Jakicic, J. M. 2016<br>(10.1001/jama.2016.1<br>2858)            | US | Head-to-<br>head<br>intervention | 335 (71)  | 31 (4)     | 24 | 31 (4) | Other focus: no<br>Inclusion criteria: no<br>Comorbidity: other | I1: Standard<br>behavioral weight<br>loss intervention<br>I2: technology<br>Enhanced weight<br>loss intervention | DH; F consum.;<br>CHO; PA; ST;<br>BMI; Wt |

|                                                     |    |                             |           |         |    |        |                                                                   |                                                                             |                                          |
|-----------------------------------------------------|----|-----------------------------|-----------|---------|----|--------|-------------------------------------------------------------------|-----------------------------------------------------------------------------|------------------------------------------|
| Daumit, G. L. 2013<br>(10.1056/NEJMoa1214530)       | US | Intervention vs usual care  | 146 (50)  | 45 (11) | 18 | 36 (7) | Other focus: yes<br>Inclusion criteria: yes<br>Comorbidity: other | I1: Usual care<br>I2: Intervention group                                    | Wt                                       |
| Davis, S. K. 2013<br>(10.4236/ojpm.2013.39071)      | US | Intervention vs usual care  | 86 (63)   | 49 (7)  | nr | 34 (4) | Other focus: yes<br>Inclusion criteria: yes<br>Comorbidity: other | I1: Usual care<br>I2: Multiple 3-month risk factor reduction intervention   | FV consum.; PA; BMI; WC; SBP; DBP; S     |
| Salinardi, T. C. 2013<br>(10.3945/ajcn.112.046995)  | US | Intervention vs usual care* | 100 (75)  | 49 (1)  | nr | 33 (1) | Other focus: no<br>Inclusion criteria: no<br>Comorbidity: other   | I1: Usual care<br>I2: Group weight-loss program                             | BMI; Wt; SBP; DBP                        |
| Samuel-Hodge, C. D. 2013<br>(10.1002/oby.20317)     | US | Intervention vs usual care  | 189 (100) | 51 (1)  | 4  | 37 (0) | Other focus: no<br>Inclusion criteria: no<br>Comorbidity: other   | I1: Usual care<br>I2: Special intervention                                  | FV consum.; ACM; Wt; SBP; DBP; QoL; DEPR |
| Goode, R. W. 2018<br>(10.1016/j.eatbeh.2018.03.005) | US | Intervention vs usual care  | 31 (100)  | 49 (13) | 2  | 34 (4) | Other focus: no<br>Inclusion criteria: no<br>Comorbidity: other   | I1: Usual care<br>I2: Appetite Awareness Training Intervention group        | ESE; ADH measure; Wt; WC; SBP; DBP; DEPR |
| Goulis, D. G. 2004<br>(10.1038/sj.ijo.0802773)      | GR | Intervention vs usual care  | 12 (100)  | 45 (13) | 6  | 38 (8) | Other focus: no<br>Inclusion criteria: no<br>Comorbidity: other   | I1: Usual care<br>I2: Specialized patient care: hospital and virtual visits | BMI; Wt; SBP; DBP; QoL                   |
| Ard, J. D. 2017<br>(10.1111/joim.12622)             | US | Head-to-head intervention*  | 409 (100) | 47 (10) | 6  | 39 (8) | Other focus: no<br>Inclusion criteria: no<br>Comorbidity: other   | I1: Weight Loss Only<br>I2: Weight Loss Plus                                | BMI; Wt; WC; SBP; DBP                    |
| Arikawa, A. Y. 2018<br>(10.1186/s40814-017-0160-9)  | US | Head-to-head intervention   | 21 (100)  | 57 (8)  | 4  | 34 (6) | Other focus: no<br>Inclusion criteria: no<br>Comorbidity: other   | I1: Calorie restricted diet plus exercise<br>I2: Weight                     | Wt; QoL                                  |

|                                                        |    |                            |           |         |   |        |                                                                   |                                                                                                                                       |                                                                       |
|--------------------------------------------------------|----|----------------------------|-----------|---------|---|--------|-------------------------------------------------------------------|---------------------------------------------------------------------------------------------------------------------------------------|-----------------------------------------------------------------------|
|                                                        |    |                            |           |         |   |        |                                                                   |                                                                                                                                       | management counseling                                                 |
| Assuncao, M. C. 2010<br>(10.1016/j.nutres.2010.07.006) | BR | Intervention vs usual care | 214 (89)  | 81 (19) | 6 | 34 (9) | Other focus: no<br>Inclusion criteria: no<br>Comorbidity: other   | I1: Usual care<br>I2: Diet and physical intervention                                                                                  | DH; F consum.; CHO; Fb consum.; FV consum.; PA; BMI; Wt; WC; SBP; DBP |
| Baria, F. 2014<br>(10.1093/ndt/gft529.)                | BR | Intervention vs usual care | 0 (0)     | 52 (9)  | 3 | 30 (3) | Other focus: yes<br>Inclusion criteria: no<br>Comorbidity: other  | I1: Usual care<br>I2: Home-based exercise group                                                                                       | DH; PA; BF; BMI; Wt; WC; CMs                                          |
| Barnason, S. A. 2013<br>(DOI NOT FOUND)                | US | Intervention vs usual care | 15 (30)   | 63 (9)  | 3 | 35 (6) | Other focus: no<br>Inclusion criteria: no<br>Comorbidity: other   | I1: Usual care<br>I2: Weight Management Intervention                                                                                  | SE; ESES; ESE; Pat. A; PA; BMI; Wt                                    |
| Carr, L. J. 2008<br>(10.1016/j.ypped.2007.12.005)      | US | Intervention vs usual care | 26 (39)   | 46 (11) | 4 | 31 (1) | Other focus: no<br>Inclusion criteria: no<br>Comorbidity: other   | I1: Usual care<br>I2: Active Living Every Day program                                                                                 | ACM; BF; BMI; Wt; WC; SBP; DBP; HD                                    |
| Cesa, G. L. 2013<br>(10.2196/jmir.2441)                | IT | Head-to-head intervention  | 90 (100)  | 32 (8)  | 1 | 41 (5) | Other focus: yes<br>Inclusion criteria: yes<br>Comorbidity: other | I1: Integrated Multimodal Medically Managed program<br>I2: Cognitive behaviour therapy<br>I3: VR-enhanced cognitive behaviour therapy | BMI; Wt                                                               |
| Cleo, G. 2018<br>(10.1038/s41366-018-0067-4)           | AU | Intervention vs usual care | 34 (68)   | 51 (11) | 3 | 35 (6) | Other focus: no<br>Inclusion criteria: no<br>Comorbidity: other   | I1: Usual care<br>I2: The ten top tips intervention                                                                                   | FV consum.; PA; BMI; Wt; WC                                           |
| Cooper, Z. 2010<br>(10.1016/j.brat.2010.03.008)        | GB | Head-to-head intervention  | 150 (100) | 41 (9)  | 6 | 35 (3) | Other focus: no<br>Inclusion criteria: no<br>Comorbidity: other   | I1: Guided self-help<br>I2: Behaviour                                                                                                 | Wt                                                                    |

|                                                                                                       |    |                                  |           |            |    |        |                                                                   |                                                                                                                                                                                                                                                                                        |                              |
|-------------------------------------------------------------------------------------------------------|----|----------------------------------|-----------|------------|----|--------|-------------------------------------------------------------------|----------------------------------------------------------------------------------------------------------------------------------------------------------------------------------------------------------------------------------------------------------------------------------------|------------------------------|
|                                                                                                       |    |                                  |           |            |    |        |                                                                   | therapy<br>I3: Cognitive<br>behaviour therapy                                                                                                                                                                                                                                          |                              |
| Daniali, S. S. 2017<br>PMCID:<br><a href="https://pubmed.ncbi.nlm.nih.gov/35515187/">PMC5515187</a> ) | IR | Intervention<br>vs usual care    | 146 (100) | 53 (7)     | 6  | 30 (4) | Other focus: yes<br>Inclusion criteria: yes<br>Comorbidity: other | I1: Usual care<br>I2: Intervention<br>group                                                                                                                                                                                                                                            | SE; DH; PA; Wt;<br>SBP; DBP  |
| de Vos, B. C. 2014<br>(10.1007/s00394-013-<br>0505-y.)                                                | NL | Intervention<br>vs usual care    | 407 (100) | 56 (3)     | nr | 32 (4) | Other focus: no<br>Inclusion criteria: no<br>Comorbidity: other   | I1: Usual care<br>I2: Individual<br>tailor-made<br>intervention to<br>reduce weight                                                                                                                                                                                                    | PA; BF; BMI; Wt;<br>QoL      |
| Hersey, J. C. 2012<br>(10.1016/j.ypped.201<br>1.09.018)                                               | US | Head-to-<br>head<br>intervention | 1292 (89) | 47 (0)     | 18 | 34 (0) | Other focus: yes<br>Inclusion criteria: no<br>Comorbidity: other  | I1: written<br>materials and<br>basic Web access<br>I2: written<br>materials and<br>basic Web access<br>plus an interactive<br>Web site<br>I3: written<br>materials and<br>basic Web access<br>plus an interactive<br>Web site, plus<br>brief telephone/e-<br>mail coaching<br>support | Wt; SBP; DBP                 |
| Heshka, S. 2003<br>(10.1001/jama.289.14.<br>1792)                                                     | US | Head-to-<br>head<br>intervention | 358 (85)  | 45<br>(10) | 24 | 34 (4) | Other focus: no<br>Inclusion criteria: no<br>Comorbidity: other   | I1: Self-help<br>program<br>I2: Structured<br>Commercial<br>weight loss<br>program                                                                                                                                                                                                     | BF; BMI; Wt;<br>WC; SBP; DBP |



|                                                         |    |                           |           |         |    |        |                                                                  |                                                                                                                                                  |                       |
|---------------------------------------------------------|----|---------------------------|-----------|---------|----|--------|------------------------------------------------------------------|--------------------------------------------------------------------------------------------------------------------------------------------------|-----------------------|
| Hsu, Ya-Ting 2013<br>(10.1016/j.psychsport.2012.11.007) | US | Head-to-head intervention | 25 (100)  | 0 (0)   | 2  | 0 (0)  | Other focus: no<br>Inclusion criteria: no<br>Comorbidity: other  | I1: SDT-based intervention with a HAES orientation<br>I2: No-SMI: exercise only intervention                                                     | ESES; SDM; PA         |
| Abdi, J. 2015 (DOI NOT FOUND)                           | IR | Head-to-head intervention | 310 (71)  | 42 (0)  | 6  | 0 (0)  | Other focus: no<br>Inclusion criteria: no<br>Comorbidity: other  | I1: Control group: Brochure<br>I2: Telephone-assisted intervention<br>I3: Web-assisted intervention                                              | Wt                    |
| Abed, H. S. 2013<br>(10.1001/jama.2013.280521)          | AU | Head-to-head intervention | 49 (33)   | 60 (10) | 15 | 33 (4) | Other focus: yes<br>Inclusion criteria: no<br>Comorbidity: other | I1: Control Group: General lifestyle advice<br>I2: Weight management                                                                             | BMI; Wt; WC; SBP; DBP |
| Adams, M. A. 2017<br>(10.1186/s12889-017-4197-8)        | US | Head-to-head intervention | 74 (77)   | 41 (9)  | 4  | 34 (6) | Other focus: no<br>Inclusion criteria: no<br>Comorbidity: other  | I1: Adaptive with Immediate Rewards<br>I2: Adaptive with Delayed Rewards<br>I3: Static with Immediate Rewards<br>I4: Static with Delayed Rewards | ACM; TS               |
| Annesi, J. J. 2017<br>(10.1016/j.orcp.2016.03.011)      | US | Head-to-head intervention | 107 (100) | 49 (7)  | 14 | 35 (3) | Other focus: no<br>Inclusion criteria: no<br>Comorbidity: other  | I1: Experimental<br>I2: Comparison                                                                                                               | ESE; PA; Wt           |

|                                                      |    |                            |          |         |    |        |                                                                 |                                                                                                                  |                                                     |
|------------------------------------------------------|----|----------------------------|----------|---------|----|--------|-----------------------------------------------------------------|------------------------------------------------------------------------------------------------------------------|-----------------------------------------------------|
| Annesi, J. J. 2015<br>(10.1080/00223980.2014.913000) | US | Head-to-head intervention  | 165 (79) | 45 (9)  | 6  | 41 (5) | Other focus: no<br>Inclusion criteria: no<br>Comorbidity: other | I1: Nutrition<br>Education<br>I2: Cognitive-Behavioral<br>Nutrition                                              | FV consum.; PA;<br>Wt                               |
| Annesi, James J. 2015<br>(DOI NOT FOUND)             | US | Head-to-head intervention  | 142 (77) | 45 (10) | 6  | 41 (5) | Other focus: no<br>Inclusion criteria: no<br>Comorbidity: other | I1: Cognitive-behavioral<br>I2: Cognitive-behavioral + mood regulation                                           | ESE; QoL; DH;<br>FV consum.; PA;<br>Wt              |
| Arab, A. 2017<br>(10.4103/2008-7802.200854)          | IR | Intervention vs usual care | 55 (68)  | 49 (1)  | 2  | 32 (1) | Other focus: no<br>Inclusion criteria: no<br>Comorbidity: other | I1: Usual care<br>I2: Lifestyle modification program                                                             | PA; WHR; BF;<br>BMI; Wt                             |
| Austel, A. 2015<br>(10.1038/ejcn.2015.11)            | DE | Intervention vs usual care | 174 (82) | 53 (1)  | 3  | 30 (0) | Other focus: no<br>Inclusion criteria: no<br>Comorbidity: other | I1: Usual care<br>I2: Intervention group (6 weeks of diet plans and 6 weeks of weight loss maintenance training) | BMI; Wt; WC                                         |
| Azar, K. M. 2016<br>(10.2196/jmir.5143)              | US | Intervention vs usual care | 44 (60)  | 60 (11) | nr | 37 (5) | Other focus: no<br>Inclusion criteria: no<br>Comorbidity: other | I1: Usual care<br>I2: Immediate group (Electronic Cardio-Metabolic Program)                                      | DH; PA; BMI;<br>Wt; WC; SBP;<br>DBP; QoL; S;<br>ANX |
| Bachman, J. L. 2012<br>(10.1038/oby.2011.360)        | US | Head-to-head intervention  | 29 (58)  | 51 (10) | 6  | 36 (5) | Other focus: no<br>Inclusion criteria: no<br>Comorbidity: other | I1: Three meal group<br>I2: Grazing group                                                                        | F consum.; CHO;<br>PA; BF; BMI                      |
| Bond, D. S. 2015<br>(10.1016/j.soard.2014.07.010)    | US | Intervention vs usual care | 69 (89)  | 46 (9)  | 2  | 45 (7) | Other focus: no<br>Inclusion criteria: no<br>Comorbidity: other | I1: Usual care<br>I2: Preoperative physical activity intervention group                                          | ESES; M + RTC;<br>PA; TS                            |

|                                                                |    |                                  |          |            |    |        |                                                                   |                                                                                            |                                                        |
|----------------------------------------------------------------|----|----------------------------------|----------|------------|----|--------|-------------------------------------------------------------------|--------------------------------------------------------------------------------------------|--------------------------------------------------------|
| Buckley, J. 2016<br>(10.1177/1359105314<br>545096)             | GB | Intervention<br>vs usual care    | 97 (100) | 37 (9)     | 3  | 0 (0)  | Other focus: no<br>Inclusion criteria: no<br>Comorbidity: other   | I1: Usual care<br>I2: intervention<br>condition                                            | ESES                                                   |
| Busnello, F. M. 2011<br>(10.1590/s0066-<br>782x2011005000077.) | BR | Intervention<br>vs usual care    | 58 (71)  | 58 (6)     | 4  | 32 (2) | Other focus: no<br>Inclusion criteria: no<br>Comorbidity: other   | I1: Usual care<br>I2: Intervention<br>group                                                | DH; BMI; Wt;<br>WC                                     |
| Carels, R. A. 2013<br>(10.1080/08870446.20<br>13.789875)       | US | Head-to-<br>head<br>intervention | 35 (67)  | 47<br>(14) | 4  | 38 (8) | Other focus: no<br>Inclusion criteria: no<br>Comorbidity: other   | I1: Behaviour<br>weight loss<br>programme<br>I2: Stepped-Care<br>condition                 | SM Wt; PA;<br>PAEE; Wt                                 |
| Gerber, B. S. 2013<br>(10.1177/1357633x13<br>490901)           | US | Head-to-<br>head<br>intervention | 88 (100) | 50 (8)     | 9  | 34 (6) | Other focus: no<br>Inclusion criteria: no<br>Comorbidity: other   | I1: telephone<br>counselling -<br>control group<br>I2: Video<br>telehealth<br>intervention | ESES; SS; DH;<br>PA; BMI; Wt                           |
| Gorin, A. A. 2013<br>(10.1037/a0026959)                        | US | Head-to-<br>head<br>intervention | 157 (78) | 49<br>(11) | 18 | 36 (6) | Other focus: no<br>Inclusion criteria: no<br>Comorbidity: other   | I1: Behavioural<br>weight loss<br>I2: Behavioural<br>weight loss+home<br>modification      | SS; DH; PA; Wt                                         |
| Greenlee, H. A. 2013<br>(10.1002/oby.20245)                    | US | Intervention<br>vs usual care    | 42 (100) | 51 (9)     | 6  | 33 (6) | Other focus: yes<br>Inclusion criteria: yes<br>Comorbidity: other | I1: Usual care<br>I2: Immediate arm                                                        | DH; F consum.;<br>FV consum.;<br>ADH Ex; PA; Wt;<br>WC |
| Adams, M. A. 2013<br>(10.1371/journal.pone<br>.0082901)        | US | Head-to-<br>head<br>intervention | 17 (85)  | 37 (9)     | 6  | 30 (3) | Other focus: no<br>Inclusion criteria: no<br>Comorbidity: other   | I1: Static<br>intervention<br>I2: Adaptive<br>intervention                                 | PA                                                     |
| Alencar, M. K. 2017<br>(10.1177/1357633x17<br>745471)          | US | Head-to-<br>head<br>intervention | 13 (52)  | 47<br>(19) | 3  | 35 (4) | Other focus: no<br>Inclusion criteria: no<br>Comorbidity: other   | I1: Control group<br>I2: Video                                                             | TS; WM; BF; Wt;<br>SBP; DBP                            |

|                                                       |    |                            |           |         |    |        |                                                                   |                                                                                                                                                                                           |                                        |
|-------------------------------------------------------|----|----------------------------|-----------|---------|----|--------|-------------------------------------------------------------------|-------------------------------------------------------------------------------------------------------------------------------------------------------------------------------------------|----------------------------------------|
|                                                       |    |                            |           |         |    |        |                                                                   | conferencing group                                                                                                                                                                        |                                        |
| Allen, J. K. 2013<br>(10.1155/2013/151597)            | US | Head-to-head intervention  | 53 (78)   | 45 (11) | 6  | 34 (4) | Other focus: no<br>Inclusion criteria: no<br>Comorbidity: other   | I1: Allocated to intensive counseling<br>I2: Allocated to intensive counseling and smartphone<br>I3: Allocated to less intensive counseling and smartphone<br>I4: Allocated to smartphone | F consum.; FV consum.; PA; BMI; Wt; WC |
| Barry, V. W. 2011<br>(10.2147/dmso.S14526)            | US | Intervention vs usual care | 16 (82)   | 47 (11) | 9  | 33 (5) | Other focus: no<br>Inclusion criteria: no<br>Comorbidity: other   | I1: Usual care<br>I2: Group Weight Loss (GWL) alone<br>I3: SenseWear Armband (SWA) alone<br>I4: GWL + SWA                                                                                 | BF; BMI; Wt; WC; SBP; DBP              |
| Bartels, S. J. 2013<br>(10.1176/appi.ps.003622012)    | US | Head-to-head intervention  | 82 (62)   | 44 (12) | 12 | 38 (8) | Other focus: yes<br>Inclusion criteria: yes<br>Comorbidity: other | I1: Fitness club<br>I2: In Shape                                                                                                                                                          | Pat. A; PA; BMI; Wt                    |
| Bennett, G. G. 2012<br>(10.1001/archinternmed.2012.1) | US | Intervention vs usual care | 250 (68)  | 55 (11) | nr | 37 (5) | Other focus: yes<br>Inclusion criteria: yes<br>Comorbidity: other | I1: Usual care<br>I2: Intervention group                                                                                                                                                  | BMI; Wt; SBP; DBP                      |
| Cayir, Y. 2015<br>(10.1080/17461391.2014.940558)      | TR | Intervention vs usual care | 100 (100) | 40 (10) | 3  | 35 (4) | Other focus: no<br>Inclusion criteria: no<br>Comorbidity: other   | I1: Usual care<br>I2: Pedometer group                                                                                                                                                     | BF; BMI; Wt; WC                        |

|                                                        |    |                             |          |         |    |        |                                                                   |                                                                                                                                                                                  |                                                  |
|--------------------------------------------------------|----|-----------------------------|----------|---------|----|--------|-------------------------------------------------------------------|----------------------------------------------------------------------------------------------------------------------------------------------------------------------------------|--------------------------------------------------|
| Cheng, H. L. 2014<br>(10.1007/s40519-014-0110-y.)      | AU | Head-to-head intervention   | 36 (100) | 22 (2)  | 12 | 34 (3) | Other focus: no<br>Inclusion criteria: no<br>Comorbidity: other   | I1: Higher-protein diet<br>I2: Higher-carbohydrate diet                                                                                                                          | DH; F consum.;<br>CHO; BF; Wt;<br>WC             |
| Christensen, J. R. 2012<br>(10.1186/1471-2458-12-625)  | DK | Head-to-head intervention * | 98 (100) | 0 (0)   | 12 | 31 (5) | Other focus: no<br>Inclusion criteria: no<br>Comorbidity: other   | I1: Intervention group (diet, physical exercise, cognitive behavioral training)<br>I2: Reference group                                                                           | PI; PA; WHR; HS;<br>BF; BMI; Wt;<br>WC; SBP; DBP |
| Christensen, P. 2013<br>(10.1002/oby.20413)            | DK | Intervention vs usual care  | 155 (81) | 63 (6)  | 12 | 37 (5) | Other focus: yes<br>Inclusion criteria: yes<br>Comorbidity: other | I1: Usual care<br>I2: Exercise<br>I3: Diet                                                                                                                                       | PA; ST; BMI; Wt;<br>WC; SBP; DBP                 |
| Cooper, J. N. 2012<br>(10.1016/j.metabol.2012.04.012.) | US | Head-to-head intervention   | 80 (89)  | 47 (6)  | 6  | 44 (6) | Other focus: no<br>Inclusion criteria: no<br>Comorbidity: other   | I1: Diet<br>I2: Diet+Physical activity                                                                                                                                           | TS; PAI; BF; BMI;<br>Wt; WC; SBP;<br>DBP         |
| Creasy, S. A. 2017<br>( 10.1002/osp4.107)              | US | Head-to-head intervention   | 38 (73)  | 44 (10) | 3  | 32 (4) | Other focus: no<br>Inclusion criteria: no<br>Comorbidity: other   | I1: unsupervised programme prescribed in steps per day<br>I2: unsupervised programme prescribed in minutes perweek ( )<br>I3: supervised programme prescribed inminutes per week | DH; TS; PAI; ST;<br>WM; HS; BF;<br>Wt; WC        |

|                                                        |    |                            |           |         |    |         |                                                                   |                                                                            |                                       |
|--------------------------------------------------------|----|----------------------------|-----------|---------|----|---------|-------------------------------------------------------------------|----------------------------------------------------------------------------|---------------------------------------|
| Erickson, Z. D. 2017<br>(10.1007/s11606-016-3960-3.)   | US | Intervention vs usual care | 20 (17)   | 51 (9)  | 2  | 0 (0)   | Other focus: yes<br>Inclusion criteria: yes<br>Comorbidity: other | I1: Usual care<br>I2: Behavioral Intervention: Lifestyle Balance           | DH; PA; BF; BMI; Wt; WC               |
| Gabriel, K. K. 2011<br>(10.1097/gme.0b013e31820acdcc)  | US | Head-to-head intervention  | 508 (100) | 57 (3)  | 12 | 31 (4)  | Other focus: no<br>Inclusion criteria: no<br>Comorbidity: other   | I1: Health education, comparison<br>I2: Lifestyle change intervention      | PA; BF; BMI; Wt; WC; SBP              |
| Grilo, C. M. 2013<br>(10.1016/j.brat.2013.10.002)      | US | Intervention vs usual care | 38 (79)   | 46 (11) | 4  | 38 (5)  | Other focus: yes<br>Inclusion criteria: yes<br>Comorbidity: other | I1: Usual care<br>I2: Self-Help Cognitive-Behavioral Therapy               | BMI; DEPR                             |
| Hales, S. 2016<br>(10.1016/j.ijmedinf.2016.07.003)     | US | Head-to-head intervention  | 42 (82)   | 46 (12) | 3  | 35 (6)  | Other focus: no<br>Inclusion criteria: no<br>Comorbidity: other   | I1: Standard app<br>I2: Social POD app                                     | ESE; SS; BMI; Wt                      |
| Heideman, W. H. 2015<br>(10.1016/j.pec.2014.12.008)    | NL | Intervention vs usual care | 65 (68)   | 55 (9)  | nr | 31 (4)  | Other focus: no<br>Inclusion criteria: no<br>Comorbidity: other   | I1: Usual care<br>I2: DiAlert                                              | Copg. DIS; BMI; Wt; WC; SBP; DBP; QoL |
| Jebb, S. A. 2011<br>(10.1016/S0140-6736(11)61344-5)    | AU | Intervention vs usual care | 668 (87)  | 47 (13) | 12 | 31 (26) | Other focus: no<br>Inclusion criteria: no<br>Comorbidity: other   | I1: Usual care<br>I2: weight watchers programme                            | Wt; WC; SBP; DBP                      |
| Johnston, C. A. 2013<br>(10.1016/j.amjmed.2013.04.025) | US | Intervention vs usual care | 260 (89)  | 47 (11) | 6  | 33 (4)  | Other focus: no<br>Inclusion criteria: no<br>Comorbidity: other   | I1: Usual care<br>I2: weight watchers group                                | Wt                                    |
| Kaholokula, J. K. 2012<br>(10.1177/1090198110394174)   | US | Head-to-head intervention  | 122 (85)  | 50 (15) | 6  | 40 (9)  | Other focus: no<br>Inclusion criteria: no<br>Comorbidity: other   | I1: PILI lifestyle program<br>I2: standard behavioural weight loss program | Wt                                    |

|                                                          |    |                            |           |        |     |        |                                                                  |                                                                                                                                                   |                         |
|----------------------------------------------------------|----|----------------------------|-----------|--------|-----|--------|------------------------------------------------------------------|---------------------------------------------------------------------------------------------------------------------------------------------------|-------------------------|
| Katzmarzyk, P. T. 2011<br>(10.1371/journal.pone.0026667) | US | Intervention vs usual care | 47 (87)   | 51 (8) | 0,2 | 31 (4) | Other focus: no<br>Inclusion criteria: no<br>Comorbidity: other  | I1: Usual care<br>I2: Education and pedometer group                                                                                               | TS; PAI; ST; BMI; WC    |
| Kempf, K. 2015<br>(10.1136/bmjopen-2018-022242)          | DE | Head-to-head intervention  | 16 (15)   | 50 (5) | 12  | 31 (5) | Other focus: no<br>Inclusion criteria: no<br>Comorbidity: other  | I1: pedometer and scales only control group<br>I2: short-term coaching plus pedometers and scales control group<br>I3: telemedical coaching group | DH; BMI; Wt; SBP; DBP   |
| Kiernan, M. 2013<br>(10.1037/a0030544)                   | US | Head-to-head intervention  | 267 (100) | 48 (8) | 6   | 32 (2) | Other focus: no<br>Inclusion criteria: no<br>Comorbidity: other  | I1: Weight loss program<br>I2: Maintenance first                                                                                                  | Wt                      |
| Leahey, T. M. 2012<br>(10.1038/oby.2011.124)             | US | Head-to-head intervention  | 52 (84)   | 52 (9) | 6   | 35 (5) | Other focus: yes<br>Inclusion criteria: no<br>Comorbidity: other | I1: Standard behavioral weight loss condition<br>I2: Behavioral Weight Loss + SC condition                                                        | SS; Prog. ADH; Wt; DEPR |
| Leahey, T. M. 2013<br>(10.1002/oby.20271)                | US | Head-to-head intervention  | 37 (84)   | 53 (5) | 6   | 36 (3) | Other focus: no<br>Inclusion criteria: no<br>Comorbidity: other  | I1: Professional coach + Behavioral weight loss<br>I2: Peer coach + Behavioral weight loss<br>I3: Mentor + Behavioral weight loss                 | SDM; Prog. ADH; PA; Wt  |

|                                                            |    |                               |           |            |    |         |                                                                   |                                                                                                                                         |                                                            |
|------------------------------------------------------------|----|-------------------------------|-----------|------------|----|---------|-------------------------------------------------------------------|-----------------------------------------------------------------------------------------------------------------------------------------|------------------------------------------------------------|
| Leehey, D. J. 2016<br>(10.1159/000447703)                  | US | Head-to-head<br>intervention  | 0 (0)     | 66 (8)     | 12 | 37 (5)  | Other focus: yes<br>Inclusion criteria: yes<br>Comorbidity: other | I1: Diet Alone<br>Group<br>I2: Exercise plus<br>Diet Group                                                                              | PA; BF; BMI;<br>QoL; DEPR                                  |
| Lin, M. 2015<br>(10.1016/j.amjmed.2015.03.013)             | US | Intervention<br>vs usual care | 105 (85)  | 51<br>(12) | 12 | 38 (8)  | Other focus: no<br>Inclusion criteria: no<br>Comorbidity: other   | I1: Usual care<br>I2: Text Message<br>Intervention                                                                                      | Wt                                                         |
| Linde, J. A. 2011<br>(10.1080/08964289.2011.568992)        | US | Intervention<br>vs usual care | 50 (73)   | 45<br>(11) | 6  | 87 (11) | Other focus: no<br>Inclusion criteria: no<br>Comorbidity: other   | I1: Usual care<br>I2: Self-directed<br>intervention group                                                                               | ADH measure;<br>Wt                                         |
| Linde, J. A. 2011<br>(10.1007/s12160-010-9232-2)           | US | Head-to-head<br>intervention  | 203 (100) | 52 (6)     | 3  | 39 (7)  | Other focus: yes<br>Inclusion criteria: yes<br>Comorbidity: other | I1: behavioral<br>weight loss<br>I2: behavioral<br>weight loss<br>combined with<br>cognitive-<br>behavioral<br>depression<br>management | Wt; DEPR                                                   |
| Liu, X. 2017<br>(10.14704/nq.2017.15.4.1156)               | CN | Intervention<br>vs usual care | 38 (100)  | 27 (3)     | nr | 0 (0)   | Other focus: no<br>Inclusion criteria: no<br>Comorbidity: other   | I1: Usual care<br>I2: Buckroyd's<br>Group-Based<br>Therapy group                                                                        | DEPR; S                                                    |
| Melanson, K. J. 2012<br>(10.1186/1475-2891-11-57)          | US | Head-to-head<br>intervention  | 138 (88)  | 39 (7)     | 3  | 31 (2)  | Other focus: no<br>Inclusion criteria: no<br>Comorbidity: other   | I1: Low energy<br>density<br>I2: Low glycemic<br>index diet plans<br>I3: program's<br>portion-controlled<br>plan                        | F consum.; CHO;<br>Fb consum.;<br>BMI; Wt; WC;<br>SBP; DBP |
| Methapatara, W. 2011<br>(10.1111/j.1440-1819.2011.02225.x) | TH | Intervention<br>vs usual care | 64 (38)   | 40<br>(10) | 3  | 28 (4)  | Other focus: yes<br>Inclusion criteria: yes<br>Comorbidity: other | I1: Usual care<br>I2: Pedometer<br>walking plus                                                                                         | BMI; Wt; WC                                                |



|                                                    |    |                            |           |         |    |        |                                                                   |                                                                                                       |                                             |
|----------------------------------------------------|----|----------------------------|-----------|---------|----|--------|-------------------------------------------------------------------|-------------------------------------------------------------------------------------------------------|---------------------------------------------|
|                                                    |    |                            |           |         |    |        |                                                                   |                                                                                                       | motivational interviewing program           |
| Miller, G. D. 2010<br>(10.1007/s12603-010-0100-3.) | US | Head-to-head intervention  | 57 (65)   | 70 (6)  | 6  | 35 (4) | Other focus: yes<br>Inclusion criteria: yes<br>Comorbidity: other | I1: weight stable group<br>I2: intensive weight loss group                                            | DH; F consum.; CHO; Fb consum.; TS; BMI; Wt |
| Murphy, P. J. 2013<br>(10.7812/tpp/12-094)         | US | Intervention vs usual care | 223 (100) | 0 (0)   | 18 | 38 (0) | Other focus: no<br>Inclusion criteria: no<br>Comorbidity: other   | I1: Usual care<br>I2: culturally adapted weight-loss program                                          | SE; ESES; ESE                               |
| Nackers, L. M. 2013<br>(10.1002/oby.20439)         | US | Head-to-head intervention  | 125 (100) | 52 (11) | 12 | 38 (4) | Other focus: no<br>Inclusion criteria: no<br>Comorbidity: other   | I1: Intake goal 1,000 kcal/day<br>I2: Intake goal 1,500 kcal/day                                      | Wt                                          |
| Nakade, M. 2012 (DOI NOT FOUND)                    | JP | Intervention vs usual care | 122 (52)  | 55 (6)  | 24 | 26 (3) | Other focus: no<br>Inclusion criteria: no<br>Comorbidity: other   | I1: Usual care<br>I2: Saku Control Obesity Program                                                    | DH; SM DI; TS; BF; BMI; Wt; WC              |
| Nakata, Y. 2011<br>(10.1159/000329619)             | JP | Head-to-head intervention  | 145 (77)  | 51 (7)  | 6  | 29 (3) | Other focus: no<br>Inclusion criteria: no<br>Comorbidity: other   | I1: Control Intervention Group<br>I2: Moderate Intervention Group<br>I3: Intensive Intervention Group | TS; PAI; BMI; Wt; WC; SBP; DBP              |
| Napolitano, M. A. 2013<br>(10.1002/oby.20232.)     | US | Intervention vs usual care | 45 (87)   | 20 (2)  | 2  | 31 (5) | Other focus: no<br>Inclusion criteria: no<br>Comorbidity: other   | I1: Usual care<br>I2: Facebook only condition<br>I3: Facebook plus condition                          | Wt                                          |

|                                                              |    |                            |          |         |    |         |                                                                   |                                                                                                                               |                              |
|--------------------------------------------------------------|----|----------------------------|----------|---------|----|---------|-------------------------------------------------------------------|-------------------------------------------------------------------------------------------------------------------------------|------------------------------|
| Oh, B. 2015<br>(10.2196/mhealth.4222)                        | KR | Head-to-head intervention  | 207 (49) | 49 (14) | 5  | 29 (3)  | Other focus: no<br>Inclusion criteria: no<br>Comorbidity: other   | I1: Control Group<br>I2: Intervention Group: mobile phone-based care-uHealth                                                  | BMI; Wt                      |
| Oh, Minsuk 2018<br>(10.1186/s12889-018-6009-1.)              | KR | Intervention vs usual care | 26 (58)  | 36 (8)  | 2  | 73 (14) | Other focus: no<br>Inclusion criteria: no<br>Comorbidity: other   | I1: Usual care<br>I2: ADCR<br>I3: Exercise<br>I4: E-ADCR                                                                      | BF; BMI; Wt;<br>WC; SBP; DBP |
| Ortner Hadziabdic, M. 2016<br>(10.1080/07315724.2014.982770) | HR | Head-to-head intervention  | 92 (74)  | 48 (12) | 12 | 42 (7)  | Other focus: no<br>Inclusion criteria: no<br>Comorbidity: other   | I1: Mediterranean diet combined with physical activity<br>I2: Standard hypolypemic diet with physical activity                | DH; PA; WM                   |
| Petosa, R. Lingyak 2016<br>(10.1080/19325037.2016.1219284)   | US | Head-to-head intervention  | 16 (70)  | 57 (9)  | 1  | 37 (7)  | Other focus: yes<br>Inclusion criteria: yes<br>Comorbidity: other | I1: Intervention (a 4-week behavioral intervention on the use of self-regulation skills for physical activity)<br>I2: Control | ESES                         |
| Pinto, A. M. 2013<br>(10.1002/oby.20044)                     | US | Head-to-head intervention  | 130 (90) | 50 (9)  | 11 | 36 (6)  | Other focus: no<br>Inclusion criteria: no<br>Comorbidity: other   | I1: Professionally delivered behavioral weight loss treatment<br>I2: Weight Watchers program<br>I3: Combined treatment        | DH; PA; Wt                   |

|                                                      |    |                            |          |         |    |         |                                                                   |                                                                                                                                                                          |                         |
|------------------------------------------------------|----|----------------------------|----------|---------|----|---------|-------------------------------------------------------------------|--------------------------------------------------------------------------------------------------------------------------------------------------------------------------|-------------------------|
| Pressler, A. 2010<br>(10.1016/j.jpmed.2010.07.008)   | DE | Head-to-head intervention  | 11 (15)  | 45 (7)  | 3  | 29 (25) | Other focus: no<br>Inclusion criteria: no<br>Comorbidity: other   | I1: intervention group receiving structured exercise schedules via an interactive website<br>I2: control group choosing workouts individually via an interactive website | TS; BF; BMI; WC         |
| Pritchett, A. M. 2012<br>(10.4172/2165-7904.1000118) | US | Intervention vs usual care | 6 (30)   | 52 (10) | 3  | 39 (6)  | Other focus: yes<br>Inclusion criteria: yes<br>Comorbidity: other | I1: Usual care<br>I2: Heart failure management plus institution of a monitored diet and exercise program                                                                 | PA; BMI; Wt;<br>WC; QoL |
| Pronk, N. P. 2011<br>(10.1155/2011/909248)           | US | Intervention vs usual care | 91 (91)  | 46 (9)  | 6  | 38 (5)  | Other focus: no<br>Inclusion criteria: no<br>Comorbidity: other   | I1: Usual care<br>I2: immediate-start (intervention group) telehealth technology                                                                                         | Wt                      |
| Raynor, H. A. 2012<br>(10.3945/ajcn.111.031153)      | US | Head-to-head intervention  | 117 (58) | 51 (10) | 18 | 35 (4)  | Other focus: no<br>Inclusion criteria: no<br>Comorbidity: other   | I1: Lifestyle (1200-1500 kcal/d, <=30% of energy as fat)<br>I2: Lifestyle + limited variety (limit variety of NND-EDFs, ie, 2 choices)                                   | DH; PA; Wt              |
| Reichard, A. 2015<br>(10.1016/j.dhjo.2014.08.002)    | US | Head-to-head intervention  | 101 (80) | 52 (0)  | 6  | 45 (0)  | Other focus: no<br>Inclusion criteria: no<br>Comorbidity: other   | I1: Stop Light Diet Program<br>I2: Usual Care diet                                                                                                                       | BMI; Wt                 |

|                                                     |    |                           |           |         |    |        |                                                                 |                                                                                                                          |                                                           |
|-----------------------------------------------------|----|---------------------------|-----------|---------|----|--------|-----------------------------------------------------------------|--------------------------------------------------------------------------------------------------------------------------|-----------------------------------------------------------|
| Rejeski, W. J. 2011<br>(10.1093/geronb/gbq104)      | US | Head-to-head intervention | 172 (66)  | 67 (5)  | 6  | 33 (4) | Other focus: no<br>Inclusion criteria: no<br>Comorbidity: other | I1: Physical activity only<br>I2: Weight loss + physical activity<br>I3: Successful aging health education control group | ESE; PA                                                   |
| Rock, C. L. 2010<br>(10.1001/jama.2010.1503)        | US | Head-to-head intervention | 692 (99)  | 44 (10) | 24 | 34 (3) | Other focus: no<br>Inclusion criteria: no<br>Comorbidity: other | I1: Standardized weight program<br>I2: Center-based intervention<br>I3: Telephone-based intervention                     | PA; WM; BMI; Wt; WC; QoL; DEPR                            |
| Donnelly, J. E. 2013<br>(10.1002/oby.20334)         | US | Head-to-head intervention | 265 (67)  | 44 (10) | 6  | 35 (5) | Other focus: no<br>Inclusion criteria: no<br>Comorbidity: other | I1: face to face clinic<br>I2: group conference calls (phone)                                                            | F consum.; CHO; FV consum.; TS; WHR; BMI; Wt              |
| Järvi, A. 2016<br>(10.1017/S0007114516000970. )     | SE | Head-to-head intervention | nr        | 0 (0)   | 4  | 31 (3) | Other focus: no<br>Inclusion criteria: no<br>Comorbidity: other | I1: reference group<br>I2: intervention                                                                                  | F consum.; CSD consum.; FV consum.; BMI; Wt; WC; SBP; DBP |
| Rolls, B. J. 2016 (DOI NOT FOUND)                   | US | Head-to-head intervention | 168 (100) | 50 (11) | 12 | 34 (4) | Other focus: no<br>Inclusion criteria: no<br>Comorbidity: other | I1: Standard advice<br>I2: Portion Selection Group<br>I3: Pre-portioned foods group                                      | F consum.; FV consum.; Wt                                 |
| Gabriele, J. M. 2011<br>(10.1007/s12160-010-9240-2) | US | Head-to-head intervention | 87 (84)   | 45 (9)  | 3  | 32 (4) | Other focus: no<br>Inclusion criteria: no<br>Comorbidity: other | I1: Minimal e-coach support<br>I2: Nondirective e-                                                                       | Wt; WC                                                    |

|                                                  |    |                             |          |         |    |        |                                                                   |                                                                                                                               |                                                |
|--------------------------------------------------|----|-----------------------------|----------|---------|----|--------|-------------------------------------------------------------------|-------------------------------------------------------------------------------------------------------------------------------|------------------------------------------------|
|                                                  |    |                             |          |         |    |        |                                                                   | coach support<br>I3: Directive e-coach support                                                                                |                                                |
| Harvey-Berino, J. 2002 (10.1038/sj.ijo.0802051.) | US | Head-to-head intervention   | 104 (86) | 48 (9)  | 18 | 32 (4) | Other focus: no<br>Inclusion criteria: no<br>Comorbidity: other   | I1: Internet Support<br>I2: Minimal in-person support<br>I3: Frequent in-person support                                       | Wt                                             |
| McGorrian, C. 2015 (10.1093/heapro/dat017.)      | IE | Intervention vs usual care  | 29 (25)  | 63 (8)  | 6  | 29 (4) | Other focus: yes<br>Inclusion criteria: yes<br>Comorbidity: other | I1: Usual care<br>I2: Cookery skills programme                                                                                | F consum.; CHO;<br>Fb consum.; FV consum.; BMI |
| McNeilly, A. M. 2011 (10.1186/1476-511X-10-217.) | GB | Head-to-head intervention   | 2 (50)   | 54 (8)  | 3  | 33 (6) | Other focus: no<br>Inclusion criteria: no<br>Comorbidity: other   | I1: alpha lipoic acid + exercise<br>I2: alpha lipoic acid                                                                     | F consum.; CHO;<br>HS; BF; BMI; Wt;<br>WC      |
| Mehring, M. 2013 (10.1186/1471-2296-14-76)       | DE | Intervention vs usual care* | 98 (53)  | 48 (13) | nr | 33 (6) | Other focus: no<br>Inclusion criteria: no<br>Comorbidity: other   | I1: Usual care<br>I2: Web-based coaching program                                                                              | BMI; Wt; WC                                    |
| Nanchahal, K. 2012 (10.1136/bmjopen-2011-000793) | GB | Intervention vs usual care  | 138 (36) | 49 (15) | nr | 33 (6) | Other focus: no<br>Inclusion criteria: no<br>Comorbidity: other   | I1: Usual care<br>I2: CAMWEL intervention                                                                                     | BF; BMI; Wt; WC                                |
| Patrick, K. 2011 (10.1007/s12160-011-9296-7)     | US | Intervention vs usual care  | 0 (0)    | 44 (8)  | 12 | 0 (0)  | Other focus: no<br>Inclusion criteria: no<br>Comorbidity: other   | I1: Usual care<br>I2: Web-based intervention                                                                                  | DH; PA; BMI;<br>Wt; WC                         |
| Pearson, E. S. 2013 (10.1016/j.jcjd.2012.12.002) | CA | Head-to-head intervention   | 34 (76)  | 0 (0)   | 3  | 44 (4) | Other focus: no<br>Inclusion criteria: no<br>Comorbidity: other   | I1: MI-via-CALC (Motivational interviewing via Co-Active Life Coaching)<br>I2: LEARN program (lifestyle, Exercise, Attitudes, | DH; Wt; WC                                     |

|                                                         |    |                               |          |            |    |        |                                                                   |                                                                                                | Relationships,<br>Nutrition)                                  |
|---------------------------------------------------------|----|-------------------------------|----------|------------|----|--------|-------------------------------------------------------------------|------------------------------------------------------------------------------------------------|---------------------------------------------------------------|
| Pellegrini, C. A. 2012<br>(10.1038/oby.2011.13)         | US | Head-to-head<br>intervention  | 44 (86)  | 44 (9)     | 6  | 34 (4) | Other focus: no<br>Inclusion criteria: no<br>Comorbidity: other   | I1: standard<br>behavioural<br>weight loss<br>(SBWL)<br>I2: SBWL plus<br>TECH<br>I3: TECH only | DH; PAI; HS; BF;<br>BMI; Wt; WC                               |
| Ross, R. 2012<br>(10.1001/archinternmed.2011.1972)      | CA | Intervention<br>vs usual care | 344 (69) | 52<br>(11) | 24 | 32 (4) | Other focus: no<br>Inclusion criteria: no<br>Comorbidity: other   | I1: Usual care<br>I2: Behavioral<br>intervention group                                         | BF; BMI; Wt;<br>WC; SBP; DBP                                  |
| Ruusunen, A. 2012<br>(10.1111/j.1464-5491.2012.03602.x) | FI | Intervention<br>vs usual care | 350 (67) | 55 (7)     | 36 | 32 (5) | Other focus: yes<br>Inclusion criteria: yes<br>Comorbidity: other | I1: Usual care<br>I2: reducing weight<br>intervention                                          | DH; F consum.;<br>Fb consum.; PA;<br>BMI; Wt; WC;<br>SBP; DBP |
| Saito, T. 2011<br>(10.1001/archinternmed.2011.275)      | JP | Intervention<br>vs usual care | 186 (29) | 0 (0)      | 36 | 27 (3) | Other focus: no<br>Inclusion criteria: no<br>Comorbidity: other   | I1: Usual care<br>I2: frequent<br>intervention                                                 | F consum.; PA;<br>BMI; Wt; WC;<br>SBP; DBP; DM                |
| Sherwood, N. E. 2010<br>(10.4278/ajhp.080826-QUAN-161)  | US | Head-to-head<br>intervention  | 50 (79)  | 50<br>(11) | 6  | 34 (4) | Other focus: no<br>Inclusion criteria: no<br>Comorbidity: other   | I1: self-directed<br>I2: 10 sessions<br>I3: 20 sessions                                        | Copg. DIS; PA;<br>Wt; DEPR                                    |
| Wagner, M. G. 2016<br>(10.1016/j.appet.2016.02.002)     | US | Intervention<br>vs usual care | 35 (65)  | 45<br>(12) | nr | 0 (0)  | Other focus: no<br>Inclusion criteria: no<br>Comorbidity: other   | I1: Usual care<br>I2: Education<br>group<br>I3: Fruit and<br>vegetable group                   | DH                                                            |
| Webber, Kelly H. 2010<br>(10.1186/1479-5868-7-4)        | US | Head-to-head<br>intervention  | 80 (100) | 49<br>(11) | 4  | 32 (4) | Other focus: no<br>Inclusion criteria: no<br>Comorbidity: other   | I1: Motivation-<br>enhanced<br>Intervention<br>I2: Standard<br>Intervention                    | SE; DH; ADH<br>measure; PA;<br>Wt; WC                         |

|                                                             |    |                                  |           |            |    |        |                                                                   |                                                                                                                                                             |                                                           |
|-------------------------------------------------------------|----|----------------------------------|-----------|------------|----|--------|-------------------------------------------------------------------|-------------------------------------------------------------------------------------------------------------------------------------------------------------|-----------------------------------------------------------|
| Sim, K. A. 2014<br>(10.1111/cob.12048)                      | AU | Intervention<br>vs usual care    | 49 (100)  | 33 (3)     | 3  | 36 (4) | Other focus: no<br>Inclusion criteria: no<br>Comorbidity: other   | I1: Usual care<br>I2: group weight<br>loss intervention                                                                                                     | BMI; Wt; WC;<br>SBP; DBP                                  |
| Sjögren, P. 2012<br>(10.1186/1476-511X-<br>11-80)           | NO | Intervention<br>vs usual care    | 44 (43)   | 68 (1)     | nr | 30 (3) | Other focus: no<br>Inclusion criteria: no<br>Comorbidity: other   | I1: Usual care<br>I2: Exercise<br>intervention group                                                                                                        | PA; TS; BF; BMI;<br>Wt; WC; SBP;<br>DBP                   |
| Sniehotta, F. F. 2011<br>(10.1371/journal.pone<br>.0023040) | GB | Intervention<br>vs usual care    | 51 (63)   | 57<br>(11) | 2  | 37 (6) | Other focus: yes<br>Inclusion criteria: yes<br>Comorbidity: other | I1: Usual care<br>I2: Face-to-face<br>group intervention                                                                                                    | F consum.; CHO;<br>PA; HR MON;<br>BF; Wt; WC;<br>SBP; DBP |
| Somers, T. J. 2012<br>(10.1016/j.pain.2012.0<br>2.023)      | US | Intervention<br>vs usual care    | 184 (79)  | 58<br>(10) | nr | 34 (4) | Other focus: yes<br>Inclusion criteria: yes<br>Comorbidity: other | I1: Usual care<br>I2: Coping Skills<br>Training alone<br>(PCST-only)<br>I3: Behavioural<br>Weight Loss alone<br>I4: PCST with<br>Behavioural<br>Weight Loss | SE; copg. DIS;<br>PD; BMI; Wt                             |
| Steeves, J. A. 2012<br>(10.1186/1479-5868-<br>9-95)         | US | Head-to-<br>head<br>intervention | 46 (79)   | 52 (9)     | 6  | 34 (5) | Other focus: no<br>Inclusion criteria: no<br>Comorbidity: other   | I1: TV Commercial<br>Stepping group<br>I2: Traditional<br>walking group                                                                                     | TS; HS; BF; BMI;<br>Wt; WC                                |
| Steinberg, D. M. 2014<br>(10.2196/jmir.2996)                | US | Intervention<br>vs usual care    | 194 (100) | 35 (6)     | nr | 30 (3) | Other focus: no<br>Inclusion criteria: no<br>Comorbidity: other   | I1: Usual care<br>I2: Weight<br>maintenance<br>intervention                                                                                                 | SQ; BMI; Wt;<br>WC; SBP; DBP;<br>DEPR                     |
| Straznicky, N. E. 2010<br>(10.2337/db09-0934)               | AU | Intervention<br>vs usual care    | 24 (40)   | 55 (4)     | nr | 32 (4) | Other focus: no<br>Inclusion criteria: no<br>Comorbidity: other   | I1: Usual care<br>I2: weight loss by<br>caloric restriction<br>alone<br>I3: weight loss +<br>caloric restriction                                            | WHR; BF; BMI;<br>Wt; WC; SBP;<br>DBP                      |

|                                                   |    |                            |          |         |    |        |                                                                 |                                                                                                                 |                                 |
|---------------------------------------------------|----|----------------------------|----------|---------|----|--------|-----------------------------------------------------------------|-----------------------------------------------------------------------------------------------------------------|---------------------------------|
|                                                   |    |                            |          |         |    |        |                                                                 |                                                                                                                 | and aerobic exercise            |
| Tandon, V. R. 2014<br>(10.4103/0976-7800.127787)  | IN | Intervention vs usual care | 60 (100) | 55 (6)  | 6  | 31 (3) | Other focus: no<br>Inclusion criteria: no<br>Comorbidity: other | I1: Usual care<br>I2: life-style modification                                                                   | BMI; Wt; WC                     |
| Tsai, A. G. 2010<br>(10.1038/oby.2009.457)        | US | Intervention vs usual care | 44 (88)  | 49 (12) | 12 | 37 (6) | Other focus: no<br>Inclusion criteria: no<br>Comorbidity: other | I1: Usual care<br>I2: Brief Counseling Group                                                                    | WC                              |
| Unick, J. L. 2012<br>(10.5402/2012/465158)        | US | Head-to-head intervention  | 24 (82)  | 42 (9)  | 6  | 45 (4) | Other focus: no<br>Inclusion criteria: no<br>Comorbidity: other | I1: SBWL<br>I2: SBWL+TECH                                                                                       | PAI; Wt                         |
| Villareal, D. T. 2011<br>(10.1056/NEJMoa1008234)  | US | Head-to-head intervention  | 67 (63)  | 70 (4)  | 12 | 37 (5) | Other focus: no<br>Inclusion criteria: no<br>Comorbidity: other | I1: Control group<br>I2: Diet group<br>I3: Exercise group<br>I4: Diet and exercise                              | PA; BF; Wt; QoL                 |
| Vissers, D. 2010<br>(10.1159/000301785)           | BE | Intervention vs usual care | 59 (74)  | 45 (10) | 12 | 32 (4) | Other focus: no<br>Inclusion criteria: no<br>Comorbidity: other | I1: Usual care<br>I2: Diet Group<br>I3: Fitness group<br>I4: NON-SMI: Vibration group                           | WHR; BF; BMI; Wt; WC; SBP; DBP  |
| Wang, Q. 2017<br>(10.1016/j.ijcard.2016.12.084. ) | CN | Intervention vs usual care | 88 (51)  | 56 (11) | 3  | 28 (2) | Other focus: no<br>Inclusion criteria: no<br>Comorbidity: other | I1: Usual care<br>I2: LIP: lifestyle intervention program on physical outcomes, depression, and quality of life | BMI; Wt; WC; SBP; DBP; QoL; ANX |
| Watson, S. 2015<br>(10.2196/jmir.3828)            | IE | Intervention vs usual care | 36 (55)  | 52 (7)  | 12 | 33 (3) | Other focus: no<br>Inclusion criteria: no<br>Comorbidity: other | I1: Usual care<br>I2: Intervention Group: Web-based program                                                     | PA; BMI; Wt; WC; SBP; DBP       |



|                                                    |    |                               |         |            |    |        |                                                                 |                                                                                                                                                        |                                                                 |
|----------------------------------------------------|----|-------------------------------|---------|------------|----|--------|-----------------------------------------------------------------|--------------------------------------------------------------------------------------------------------------------------------------------------------|-----------------------------------------------------------------|
| Zwickert, K. 2016<br>(10.1016/j.orcp.2016.01.001)  | AU | Head-to-head<br>intervention  | 43 (72) | 44<br>(35) | 15 | 38 (1) | Other focus: no<br>Inclusion criteria: no<br>Comorbidity: other | I1: cognitive-behaviour<br>therapy+intensive<br>text-message and<br>e-mail<br>I2: cognitive-behaviour<br>therapy+minimal<br>text-message and<br>e-mail | SE; ESE; BMI;<br>Wt; WC                                         |
| Soureti, A. 2011<br>(10.2196/jmir.1773)            | GB | Intervention<br>vs usual care | nr      | 46 (9)     | 1  | 32 (6) | Other focus: no<br>Inclusion criteria: no<br>Comorbidity: other | I1: Usual care<br>I2: Planning tool<br>I3: Planning tool<br>and text reminders                                                                         | DH; F consum.                                                   |
| Soureti, Anastasia<br>2011<br>(10.2196/jmir.1579.) | GB | Intervention<br>vs usual care | nr      | 47 (8)     | 1  | 36 (6) | Other focus: no<br>Inclusion criteria: no<br>Comorbidity: other | I1: Usual care<br>I2: Planning group<br>I3: Heart-age<br>message group<br>I4: Heart-age<br>message +<br>planning group                                 | F consum.; F<br>consum.                                         |
| Schroder, K. E. 2011<br>(10.5993/ajhb.35.2.5.)     | US | Head-to-head<br>intervention  | nr      | 44<br>(11) | 1  | 34 (6) | Other focus: no<br>Inclusion criteria: no<br>Comorbidity: other | I1: computer-assisted<br>dieting<br>intervention<br>I2: computer-assisted<br>dieting<br>intervention with<br>self-management<br>training on<br>dieting | DH; F consum.;<br>CHO; Fb<br>consum.; FV<br>consum.; BMI;<br>Wt |
| Kempf, K. 2018<br>(10.1155/2018/7530602)           | DE | Intervention<br>vs usual care | 99 (55) | 45<br>(10) | 12 | 33 (5) | Other focus: no<br>Inclusion criteria: no<br>Comorbidity: other | I1: Usual care<br>I2: Telemedical<br>coaching group                                                                                                    | BMI; Wt; WC;<br>SBP; DBP                                        |

|                                                       |    |                             |           |         |   |        |                                                                 |                                                                                                                                |                                                         |
|-------------------------------------------------------|----|-----------------------------|-----------|---------|---|--------|-----------------------------------------------------------------|--------------------------------------------------------------------------------------------------------------------------------|---------------------------------------------------------|
|                                                       |    |                             |           |         |   |        |                                                                 | I3: Telemedical group                                                                                                          |                                                         |
| Karintrakul, S. 2017<br>(10.4162/nrp.2017.11.4.319)   | TH | Intervention vs usual care  | 45 (100)  | 33 (6)  | 3 | 27 (3) | Other focus: no<br>Inclusion criteria: no<br>Comorbidity: other | I1: Usual care<br>I2: Intervention<br>Individual nutrition counseling                                                          | M + RTC; F consum.; CHO; PA; BF; BMI; Wt; WC            |
| Mason, A. E. 2016<br>(10.1002/oby.21396)              | US | Head-to-head intervention   | 194 (80)  | 47 (13) | 6 | 36 (4) | Other focus: no<br>Inclusion criteria: no<br>Comorbidity: other | I1: Active Control (diet+ exercise + without mindfull eating)<br>I2: Mindfulness Group (diet+ exercise + with mindfull eating) | SQ; ME; Wt; WC; SBP; DBP; S                             |
| White, C. 2010<br>(10.3109/09637480903397355)         | GB | Intervention vs usual care  | 169 (100) | 37 (15) | 9 | 32 (8) | Other focus: no<br>Inclusion criteria: no<br>Comorbidity: other | I1: Usual care<br>I2: Group 2 (energy fat intake reduction diet)<br>I3: Group 1 (energy fat and sucrose reduction diet)        | F consum.; CHO; WM; BF; BMI; WC; QoL                    |
| Whittemore, R. 2009<br>(10.1097/NNR.0b013e31818fcef3) | US | Intervention vs usual care* | 52 (90)   | 46 (13) | 6 | 39 (8) | Other focus: no<br>Inclusion criteria: no<br>Comorbidity: other | I1: Usual care<br>I2: Lifestyle change program                                                                                 | DH; PA; BMI; WC; DEPR                                   |
| Willis, E. A. 2017<br>(10.1002/osp4.96)               | US | Head-to-head intervention   | 59 (84)   | 47 (12) | 6 | 36 (4) | Other focus: no<br>Inclusion criteria: no<br>Comorbidity: other | I1: Phone conference<br>I2: Online Social Networks                                                                             | F consum.; ADH measure; ADH D; ADH Ex; ACM; BMI; Wt; WC |
| Wilson, M. G. 2016<br>(10.1097/jom.0000000000000873)  | US | Head-to-head                | 419 (63)  | 47 (0)  | 6 | 34 (8) | Other focus: no<br>Inclusion criteria: no<br>Comorbidity: other | I1: Telephone coaching<br>I2: Small group                                                                                      | DH; F consum.; PA; BMI; Wt                              |

|                                                              |    | intervention<br>*                 |           |            |    |             |                                                                   | coaching<br>I3: Self-study                                                                 |                                                      |
|--------------------------------------------------------------|----|-----------------------------------|-----------|------------|----|-------------|-------------------------------------------------------------------|--------------------------------------------------------------------------------------------|------------------------------------------------------|
| Höchsmann, C. 2018<br>(10.1097/JSM.000000<br>0000000438.)    | CH | Head-to-<br>head<br>intervention  | 4 (13)    | 40 (7)     | 1  | 29 (3)      | Other focus: no<br>Inclusion criteria: no<br>Comorbidity: other   | I1: E-Bike<br>I2: Bike                                                                     | HR MON; BMI;<br>Wt; SBP; DBP                         |
| Chang, M. W. 2010<br>(10.1016/j.jneb.2010.0<br>1.010)        | US | Intervention<br>vs usual care     | 129 (100) | 25 (4)     | 2  | 188<br>(12) | Other focus: no<br>Inclusion criteria: no<br>Comorbidity: other   | I1: Usual care<br>I2: Intervention<br>group                                                | F consum.; FV<br>consum.; PA;<br>Wt; QoL; DEPR;<br>S |
| Cayir, Y. 2014 (DOI<br>NOT FOUND)                            | TR | Head-to-<br>head<br>intervention  | 80 (100)  | 40<br>(11) | 3  | 35 (3)      | Other focus: no<br>Inclusion criteria: no<br>Comorbidity: other   | I1: control group:<br>diet, exercise<br>I2: Diet, Exercise<br>and Group-based<br>education | BF; BMI; Wt; WC                                      |
| Christian, J. G. 2011<br>(10.1016/j.jada.2010.1<br>0.006)    | US | Intervention<br>vs usual<br>care* | 190(68)   | 50<br>(12) | 12 | 34 (7)      | Other focus: no<br>Inclusion criteria: no<br>Comorbidity: other   | I1: Usual care<br>I2: Computer<br>support program                                          | PA; Wt; WC;<br>SBP; DBP                              |
| Collins, C. E. 2012<br>(10.2196/jmir.1980)                   | AU | Intervention<br>vs usual care     | 180 (58)  | 42<br>(10) | 3  | 32 (4)      | Other focus: no<br>Inclusion criteria: no<br>Comorbidity: other   | I1: Usual care<br>I2: Basic online<br>program<br>I3: Enhanced<br>online program            | PA; HR MON;<br>TS; BMI; Wt;<br>WC; SBP; DBP;<br>QoL  |
| de Zwaan, M. 2017<br>(10.1001/jamapsychia<br>try.2017.2150.) | DE | Head-to-<br>head<br>intervention  | 148 (75)  | 43<br>(12) | 4  | 34 (4)      | Other focus: yes<br>Inclusion criteria: yes<br>Comorbidity: other | I1: Guided self-<br>help<br>I2: Cognitive<br>behavioral therapy                            | BMI; QoL                                             |
| Derose, K. P. 2018<br>(10.1177/0890117118<br>813333. )       | US | Intervention<br>vs usual<br>care* | 167 (78)  | 51 (0)     | 5  | 32 (0)      | Other focus: no<br>Inclusion criteria: no<br>Comorbidity: other   | I1: Usual care<br>I2: Church-based<br>intervention                                         | DH; PA; BMI;<br>Wt; SBP; DBP                         |
| Dhur 2014<br>(10.3945/ajcn.114.089<br>573)                   | DK | Intervention<br>vs usual care     | 234 (76)  | 42<br>(12) | 4  | 0 (0)       | Other focus: no<br>Inclusion criteria: no<br>Comorbidity: other   | I1: Usual care<br>I2: breakfast<br>I3: no-breakfast                                        | Wt                                                   |

|                                                               |    |                            |           |         |    |        |                                                                 |                                                                                                                 |                                                      |
|---------------------------------------------------------------|----|----------------------------|-----------|---------|----|--------|-----------------------------------------------------------------|-----------------------------------------------------------------------------------------------------------------|------------------------------------------------------|
| DiMarco, Ilyse Dobrow 2009<br>(10.1016/j.eatbeh.2009.02.001.) | US | Intervention vs usual care | 32 (82)   | 40 (9)  | 3  | 32 (3) | Other focus: no<br>Inclusion criteria: no<br>Comorbidity: other | I1: Usual care<br>I2: standard guided self-help behavioural weight loss treatment AND motivational interviewing | BMI; QoL                                             |
| Dimitrov Ulian, M. 2018<br>(10.1371/journal.pone.0198401)     | BR | Head-to-head intervention  | 97 (100)  | 35 (7)  | 7  | 34 (3) | Other focus: no<br>Inclusion criteria: no<br>Comorbidity: other | I1: CONTROL group<br>I2: Intensified "Health at every size" intervention                                        | FV consum.; PAI; ST; WHR; HS; BMI; Wt; WC            |
| Driehuis, F. 2012<br>(10.1016/j.pec.2012.03.017)              | NL | Intervention vs usual care | nr        | 57 (8)  | 36 | 29 (3) | Other focus: no<br>Inclusion criteria: no<br>Comorbidity: other | I1: Usual care<br>I2: Nurse practitioners counselling                                                           | F consum.; CHO; FV consum.; FV consum.; ACM; PAI; Wt |
| Dutton, G. R. 2017<br>(10.1186/s12966-017-0564-1)             | US | Head-to-head intervention  | 103 (95)  | 52 (13) | 12 | 35 (4) | Other focus: no<br>Inclusion criteria: no<br>Comorbidity: other | I1: campaign<br>I2: self-directed                                                                               | BMI; Wt                                              |
| Esposito, K. 2003<br>(10.1001/jama.289.14.1799)               | IT | Intervention vs usual care | 120 (100) | 35 (5)  | 24 | 35 (2) | Other focus: no<br>Inclusion criteria: no<br>Comorbidity: other | I1: Usual care<br>I2: Weight loss and lifestyle program                                                         | F consum.; CHO; Fb consum.; WHR; BMI; Wt             |
| Fitzgibbon, M. L. 2005<br>(DOI NOT FOUND)                     | US | Head-to-head intervention  | 59 (100)  | 48 (11) | 3  | 39 (7) | Other focus: no<br>Inclusion criteria: no<br>Comorbidity: other | I1: Culturally Tailored Weight Loss Intervention.<br>I2: Faith-Based Weight Loss Intervention.                  | F consum.; PA; BMI                                   |
| Fitzgibbon, M. L. 2010<br>(10.1038/oby.2010.47)               | US | Intervention vs usual care | 100 (47)  | 46 (8)  | 18 | 39 (6) | Other focus: no<br>Inclusion criteria: no<br>Comorbidity: other | I1: Usual care<br>I2: weight loss/maintenance intervention                                                      | FV consum.; BMI; Wt                                  |

|                                                           |    |                               |           |            |    |        |                                                                 |                                                                                            |                                                          |
|-----------------------------------------------------------|----|-------------------------------|-----------|------------|----|--------|-----------------------------------------------------------------|--------------------------------------------------------------------------------------------|----------------------------------------------------------|
| Forman, Evan M. 2016<br>(10.1002/oby.21601)               | US | Head-to-head<br>intervention  | nr        | 52<br>(10) | 12 | 37 (6) | Other focus: no<br>Inclusion criteria: no<br>Comorbidity: other | I1: Standard<br>behavioural<br>treatment<br>I2: Acceptance-<br>based treatment             | SE; copg. DIS;<br>Wt                                     |
| Forman, E. M. 2018<br>(10.1007/s10865-018-<br>9964-1)     | US | Head-to-head<br>intervention  | 35 (68)   | 54<br>(13) | 1  | 34 (6) | Other focus: no<br>Inclusion criteria: no<br>Comorbidity: other | I1: Non-optimized<br>I2: Individually<br>optimized<br>I3: Group<br>optimized               | Wt                                                       |
| Fritz, T. 2011<br>(10.1111/j.1464-<br>5491.2011.03348.x)  | SE | Intervention<br>vs usual care | 94 (44)   | 61 (5)     | 4  | 30 (3) | Other focus: no<br>Inclusion criteria: no<br>Comorbidity: other | I1: Usual care<br>I2: exercise-<br>intervention                                            | SQ; PD; BMI;<br>QoL; SF                                  |
| Gagnon, C. 2011<br>(10.1016/j.diabet.201<br>1.01.003)     | CA | Head-to-head<br>intervention  | 26 (54)   | 57<br>(11) | 12 | 35 (5) | Other focus: no<br>Inclusion criteria: no<br>Comorbidity: other | I1: Individual<br>counselling +<br>seminars<br>I2: Only seminars                           | F consum.; CHO;<br>PA; PAEE; BMI;<br>Wt; WC; SBP;<br>DBP |
| Gagnon-Girouard, M.<br>2010<br>(10.1155/2010/92809<br>7.) | CA | Intervention<br>vs usual care | 144 (100) | 42 (6)     | 4  | 30 (3) | Other focus: no<br>Inclusion criteria: no<br>Comorbidity: other | I1: Usual care<br>I2: Healthy at<br>every size<br>I3: Social support                       | Copg. DIS; Wt;<br>QoL; DEPR                              |
| Gallagher, R. 2014<br>(10.1177/2047487313<br>486043)      | AU | Intervention<br>vs usual care | 62 (42)   | 63 (9)     | 4  | 31 (3) | Other focus: no<br>Inclusion criteria: no<br>Comorbidity: other | I1: Usual care<br>I2: Healthy Eating<br>and Exercise<br>Lifestyle Program                  | SE; PA; BMI; Wt;<br>WC; SBP; DBP                         |
| Gokke-LaRose, J. 2009<br>(10.1186/1479-5868-<br>6-10)     | US | Head-to-head<br>intervention  | 33 (84)   | 29 (4)     | 2  | 33 (3) | Other focus: no<br>Inclusion criteria: no<br>Comorbidity: other | I1: Behavioral self-<br>regulation<br>condition<br>I2: Standard<br>behavioral<br>treatment | Copg. DIS; Wt;<br>DEPR                                   |

|                                                       |    |                            |           |         |    |        |                                                                 |                                                                                   |                                            |
|-------------------------------------------------------|----|----------------------------|-----------|---------|----|--------|-----------------------------------------------------------------|-----------------------------------------------------------------------------------|--------------------------------------------|
| Gao, S. 2016<br>(10.1016/j.pmedr.2015.12.007)         | US | Intervention vs usual care | 40 (17)   | 63 (13) | 12 | 32 (5) | Other focus: no<br>Inclusion criteria: no<br>Comorbidity: other | I1: Usual care<br>I2: Physical activity counseling                                | PA; ACM                                    |
| Geiker, N. R. 2016<br>(10.3945/ajcn.115.126565)       | DK | Head-to-head intervention  | nr        | 31 (7)  | 6  | 32 (5) | Other focus: no<br>Inclusion criteria: no<br>Comorbidity: other | I1: Control group, simple energy restriction<br>I2: Menstralean group             | Wt; WC                                     |
| Godino, J. G. 2016<br>(10.1016/s2213-8587(16)30105-x) | US | Head-to-head intervention  | 284 (70)  | 0 (0)   | 24 | 29 (3) | Other focus: no<br>Inclusion criteria: no<br>Comorbidity: other | I1: Control group<br>I2: SMART intervention                                       | Prog. ADH; BMI; WC; SBP; DBP               |
| Huang, A. J. 2010<br>(10.1001/archinternmed.2010.162) | US | Head-to-head intervention  | 338 (100) | 53 (8)  | 6  | 37 (6) | Other focus: no<br>Inclusion criteria: no<br>Comorbidity: other | I1: Intensive behavioral weight loss<br>I2: Structured education program          | PA; BMI; Wt; WC; SBP; DBP; QoL             |
| Hunter, C. M. 2008<br>(10.1016/j.amepre.2007.09.026)  | US | Intervention vs usual care | 224 (50)  | 34 (7)  | 6  | 29 (3) | Other focus: no<br>Inclusion criteria: no<br>Comorbidity: other | I1: Usual care<br>I2: Behavioral internet therapy + usual care                    | F consum.; FV consum.; PA; BF; BMI; Wt; WC |
| Imanaka, M. 2013<br>(10.2196/jmir.2405)               | JP | Head-to-head intervention  | 27 (14)   | 50 (7)  | 3  | 27 (3) | Other focus: no<br>Inclusion criteria: no<br>Comorbidity: other | I1: Web-based self-disclosure health support<br>I2: Email health support          | BMI; Wt; WC; QoL                           |
| Iriyama, Y. 2014<br>(10.1177/0017896912471038)        | JP | Intervention vs usual care | 0 (0)     | 46 (0)  | 6  | 26 (3) | Other focus: no<br>Inclusion criteria: no<br>Comorbidity: other | I1: Usual care<br>I2: Nutrition education + nutrition environmental interventions | BMI; Wt; WC; SBP; DBP                      |

|                                                     |    |                            |          |         |    |        |                                                                   |                                                                                                                                |                                                                   |
|-----------------------------------------------------|----|----------------------------|----------|---------|----|--------|-------------------------------------------------------------------|--------------------------------------------------------------------------------------------------------------------------------|-------------------------------------------------------------------|
| Irvine, L. 2017<br>(10.1093/alcalc/agx067)          | GB | Head-to-head intervention  | 0 (0)    | 52 (0)  | 2  | 36 (5) | Other focus: yes<br>Inclusion criteria: yes<br>Comorbidity: other | I1: Intervention<br>I2: Control                                                                                                | BMI                                                               |
| Jamal, S. N. 2016<br>(10.1371/journal.pone.0160343) | MY | Head-to-head intervention  | 141 (73) | 40 (9)  | 6  | 32 (4) | Other focus: no<br>Inclusion criteria: no<br>Comorbidity: other   | I1: Group support lifestyle modification<br>I2: Dietary counseling                                                             | ESE; SS; F consum.; CHO; PA; HS; BMI; Wt; WC; SBP; DBP; QoL; DEPR |
| Jane, M. 2017<br>(10.1371/journal.pone.0178326)     | AU | Intervention vs usual care | 57 (42)  | 50 (11) | 6  | 33 (6) | Other focus: no<br>Inclusion criteria: no<br>Comorbidity: other   | I1: Usual care<br>I2: Pamphlet group<br>I3: Facebook group                                                                     | F consum.; CHO; TS; HS; BF; BMI; Wt; WC; SBP; DBP; QoL; DEPR      |
| Little, P. 2016<br>(10.1016/s2213-8587(16)30099-7)  | GB | Head-to-head intervention  | 520 (64) | 54 (13) | 6  | 37 (6) | Other focus: yes<br>Inclusion criteria: yes<br>Comorbidity: other | I1: Dietetic advice<br>I2: POWeR+Face-to-face group<br>I3: POWeR+Remote group                                                  | DH; F consum.; CSD consum.; FV consum.; PA; BF; Wt; SBP; DBP; QoL |
| Jakicic, J. M. 2011<br>(10.1038/oby.2010.122)       | US | Head-to-head intervention  | 246 (91) | 44 (8)  | 18 | 27 (2) | Other focus: no<br>Inclusion criteria: no<br>Comorbidity: other   | I1: Self-help intervention<br>I2: Moderate physical activity dose intervention<br>I3: High physical activity dose intervention | PA; BF; BMI; Wt; WC                                               |
| Lutes, L. D. 2017<br>(10.1007/s11606-017-3987-0)    | US | Intervention vs usual care | 71 (15)  | 55 (10) | 12 | 36 (6) | Other focus: yes<br>Inclusion criteria: yes<br>Comorbidity: other | I1: Usual care<br>I2: ASPIRE-Phone<br>I3: ASPIRE-Group                                                                         | DH; PA; TS; BMI; Wt; WC; SBP; DBP; QoL; QoL                       |
| Lally, P. 2008<br>(10.1038/sj.ijo.0803771)          | GB | Intervention vs usual care | 69 (66)  | 41 (10) | 2  | 31 (5) | Other focus: no<br>Inclusion criteria: no<br>Comorbidity: other   | I1: Usual care<br>I2: Ten Top Tips (habit-formation model)                                                                     | Wt; QoL                                                           |

|                                                                      |    |                                  |           |            |    |                       |                                                                 |                                                                                                       |                                                                        |
|----------------------------------------------------------------------|----|----------------------------------|-----------|------------|----|-----------------------|-----------------------------------------------------------------|-------------------------------------------------------------------------------------------------------|------------------------------------------------------------------------|
| Jelsma, J. G. M. 2018<br>(10.1002/dmrr.2942)                         | AU | Intervention<br>vs usual care    | 59 (100)  | 35 (5)     | 6  | 31 (5)                | Other focus: no<br>Inclusion criteria: no<br>Comorbidity: other | I1: Usual care<br>I2: patient<br>centered<br>counseling                                               | ESES; ESE; SS;<br>DH; F consum.;<br>CHO; Fb<br>consum.; ACM;<br>TS; ST |
| Jospe, M. R. 2017<br>(10.1002/oby.21898)                             | NZ | Head-to-<br>head<br>intervention | 155 (78)  | 48<br>(11) | 12 | 33 (1)                | Other focus: no<br>Inclusion criteria: no<br>Comorbidity: other | I1: Advice only<br>I2: Daily weighing<br>I3: MyFitnessPal<br>I4: Brief support<br>I5: Hunger training | BF; BMI; Wt;<br>WC; SBP; DBP;<br>DEPR; ANX                             |
| Juliana, N. 2017<br>(10.6133/apjcn.12201<br>5.05)                    | MY | Intervention<br>vs usual care    | 31 (100)  | 49 (8)     | 4  | 301548<br>3871<br>(4) | Other focus: no<br>Inclusion criteria: no<br>Comorbidity: other | I1: Usual care<br>I2: Dietary &<br>physical<br>intervention                                           | F consum.; CHO;<br>PA; BF; BMI                                         |
| Kalter-Leibovici, O.<br>2010<br>(10.1001/archinternm<br>ed.2010.103) | IL | Head-to-<br>head<br>intervention | 202 (100) | 44 (6)     | 12 | 34 (3)                | Other focus: no<br>Inclusion criteria: no<br>Comorbidity: other | I1: intensive<br>lifestyle<br>intervention<br>I2: moderate<br>lifestyle<br>intervention               | Wt; WC; SBP;<br>DBP; QoL                                               |
| Kennedy, B. M. 2005<br>(DOI NOT FOUND)                               | US | Head-to-<br>head<br>intervention | nr        | 44<br>(10) | 6  | 39 (7)                | Other focus: no<br>Inclusion criteria: no<br>Comorbidity: other | I1: group level<br>intervention<br>I2: individual level<br>intervention                               | PA; BF; BMI; Wt;<br>SBP; DBP; QoL                                      |
| Latner, J. D. 2013<br>(10.1016/j.brat.2013.0<br>4.009)               | US | Intervention<br>vs usual care    | 58 (64)   | 50<br>(12) | 24 | 36 (8)                | Other focus: no<br>Inclusion criteria: no<br>Comorbidity: other | I1: Usual care<br>I2: Continuing care                                                                 | Copg. DIS; SS;<br>INTEG work.; SF;<br>DH; PA; BMI;<br>Wt; WC; QoL      |
| Lewis, K. H. 2015<br>(10.1111/cob.12095)                             | US | Head-to-<br>head<br>intervention | 35 (64)   | 44 (9)     | 3  | 35 (5)                | Other focus: no<br>Inclusion criteria: no<br>Comorbidity: other | I1: grocery clinic<br>arm<br>I2: clinic arm                                                           | KNWL; BMI                                                              |



|                                                            |    |                               |           |            |    |        |                                                                   |                                                                                             |                                     |
|------------------------------------------------------------|----|-------------------------------|-----------|------------|----|--------|-------------------------------------------------------------------|---------------------------------------------------------------------------------------------|-------------------------------------|
| Lillis, J. 2016<br>(10.1002/oby.21680)                     | US | Head-to-head<br>intervention  | 138 (85)  | 50<br>(11) | 12 | 38 (5) | Other focus: no<br>Inclusion criteria: no<br>Comorbidity: other   | I1: acceptance-based behavioural<br>intervention<br>I2: standard behavioural<br>treatment   | Wt                                  |
| Greaves, Colin J. 2008<br>(10.3399/bjgp08X3196<br>48)      | GB | Intervention<br>vs usual care | 90 (64)   | 54<br>(12) | 6  | 0 (0)  | Other focus: no<br>Inclusion criteria: no<br>Comorbidity: other   | I1: Usual care<br>I2: Motivational<br>interviewing                                          | PA; Wt; WC                          |
| Green, C. A. 2015<br>(10.1176/appi.ajp.201<br>4.14020173.) | US | Intervention<br>vs usual care | 144 (72)  | 47<br>(11) | 12 | 38 (8) | Other focus: yes<br>Inclusion criteria: yes<br>Comorbidity: other | I1: Usual care<br>I2: moderate<br>caloric reduction,<br>DASH diet, and<br>physical activity | BMI; Wt; SBP;<br>DBP; DM            |
| Haapala, I. 2009<br>(10.1017/S136898000<br>9005230)        | FI | Intervention<br>vs usual care | 120 (96)  | 38 (5)     | 12 | 31 (3) | Other focus: no<br>Inclusion criteria: no<br>Comorbidity: other   | I1: Usual care<br>I2: A mobile<br>phone-operated<br>weight-loss<br>program                  | ESE; Wt; WC                         |
| Hageman, P. A. 2017<br>(10.1155/2017/16026<br>27)          | US | Head-to-head<br>intervention  | 301 (100) | 54 (7)     | 30 | 0 (0)  | Other focus: no<br>Inclusion criteria: no<br>Comorbidity: other   | I1: Web-based<br>only<br>I2: Web-based<br>discussion<br>I3: Web-based<br>email              | DH; PA; ACM;<br>Wt; WC; SBP;<br>DBP |
| Haggerty, A. F. 2017<br>(10.1002/oby.22021)                | US | Intervention<br>vs usual care | 42 (100)  | 60<br>(59) | 6  | 41 (8) | Other focus: no<br>Inclusion criteria: no<br>Comorbidity: other   | I1: Usual care<br>I2: Text4Diet<br>I3: Telemedicine                                         | PA; Wt; WC;<br>QoL; SF              |
| Harrington, D. M.<br>2014<br>(10.1002/oby.20684.)          | US | Head-to-head<br>intervention  | 103 (85)  | 52 (8)     | 3  | 30 (3) | Other focus: no<br>Inclusion criteria: no<br>Comorbidity: other   | I1: Dietary<br>guideline<br>education only<br>group<br>I2: Dietary                          | ACM; Wt; WC                         |

|                                                             |    |                                       |          |            |    |        |                                                                  | guideline<br>education<br>+Physical activity<br>group                                                  |                                                                |
|-------------------------------------------------------------|----|---------------------------------------|----------|------------|----|--------|------------------------------------------------------------------|--------------------------------------------------------------------------------------------------------|----------------------------------------------------------------|
| Harris, L. 2017<br>(10.1017/s000711451<br>7001933)          | GB | Head-to-<br>head<br>intervention<br>* | 32 (64)  | 42<br>(15) | 12 | 41 (7) | Other focus: yes<br>Inclusion criteria: no<br>Comorbidity: other | I1: the Waist<br>Winners Too<br>health education<br>programme<br>I2: TAKE 5<br>intervention            | ACM; ST; BMI;<br>Wt; WC; QoL                                   |
| Hartman, S. J. 2016<br>(10.1016/j.amepre.20<br>16.06.024)   | US | Intervention<br>vs usual care         | 54 (100) | 60 (6)     | 6  | 32 (4) | Other focus: no<br>Inclusion criteria: no<br>Comorbidity: other  | I1: Usual care<br>I2: MyFitnessPal<br>and a Fitbit                                                     | PA; Wt                                                         |
| Harvey-Berino, J. 2010<br>(10.1016/j.ypped.201<br>0.04.018) | US | Head-to-<br>head<br>intervention      | 447 (93) | 47<br>(10) | 6  | 36 (6) | Other focus: no<br>Inclusion criteria: no<br>Comorbidity: other  | I1: In person<br>I2: Hybrid<br>I3: Internet                                                            | F consum.; PA;<br>Wt                                           |
| Heiestad, H. 2016<br>(10.1155/2016/38159<br>76)             | NO | Intervention<br>vs usual care         | 62 (100) | 40<br>(11) | 3  | 31 (5) | Other focus: no<br>Inclusion criteria: no<br>Comorbidity: other  | I1: Usual care<br>I2: Nonsupervised<br>exercise                                                        | QoL                                                            |
| Kliemann, N. 2017<br>(10.1186/s12966-017-<br>0578-8)        | GB | Intervention<br>vs usual care         | 353 (66) | 59 (3)     | 3  | 36 (1) | Other focus: no<br>Inclusion criteria: no<br>Comorbidity: other  | I1: Usual care<br>I2: 10 Top Tips<br>trial: habit-based<br>advice for weight                           | ESE; BMI; Wt;<br>WC; SBP; DBP                                  |
| Knauper, B. 2018<br>(10.1002/oby.22226)                     | US | Head-to-<br>head<br>intervention      | 167 (80) | 50<br>(12) | 12 | 0 (0)  | Other focus: no<br>Inclusion criteria: no<br>Comorbidity: other  | I1: Standard<br>Diabetes<br>Prevention<br>Program<br>I2: Enhanced<br>Diabetes<br>Prevention<br>Program | DH; F consum.;<br>SM DI; SM PA;<br>PA; TS; Wt; WC;<br>SBP; DBP |

|                                                            |    |                            |          |         |    |         |                                                                   |                                                                                                                             |                                                                            |
|------------------------------------------------------------|----|----------------------------|----------|---------|----|---------|-------------------------------------------------------------------|-----------------------------------------------------------------------------------------------------------------------------|----------------------------------------------------------------------------|
| Kraschnewski, J. L. 2011<br>(10.1016/j.amepre.2011.08.012) | US | Intervention vs usual care | 70 (70)  | 50 (11) | 3  | 33 (4)  | Other focus: no<br>Inclusion criteria: no<br>Comorbidity: other   | I1: Usual care<br>I2: Achieve Together intervention                                                                         | DH; BMI; Wt;<br>SBP; DBP; QoL                                              |
| Kreider, R. B. 2011<br>(10.1016/j.jada.2011.03.013)        | US | Head-to-head intervention  | 90 (100) | 41 (11) | 2  | 34 (5)  | Other focus: no<br>Inclusion criteria: no<br>Comorbidity: other   | I1: Meal-replacement program<br>I2: Supervised diet and exercise program                                                    | DH; F consum.;<br>CHO; PA; HR<br>MON; REE; BF;<br>BMI; Wt; WC;<br>SBP; DBP |
| Kristeller, Jean 2014<br>(10.1007/s12671-012-0179-1)       | US | Intervention vs usual care | 132 (88) | 47 (0)  | 2  | 40 (10) | Other focus: no<br>Inclusion criteria: no<br>Comorbidity: other   | I1: Usual care<br>I2: Psycho-educational Cognitive-Behavioural Treatment<br>I3: Mindfulness-Based Eating Awareness Training | ESE; DH; BMI;<br>DEPR                                                      |
| Krouni, A. 2017<br>(10.4103/jfmpc.jfmpc_179_17.)           | IR | Intervention vs usual care | 60 (100) | 27 (5)  | 3  | 29 (5)  | Other focus: yes<br>Inclusion criteria: yes<br>Comorbidity: other | I1: Usual care<br>I2: High-fiber, low-caloric balanced diet                                                                 | BMI                                                                        |
| Logue, E. 2005<br>(10.1038/oby.2005.106)                   | US | Head-to-head intervention  | 458 (69) | 0 (0)   | 24 | 0 (0)   | Other focus: no<br>Inclusion criteria: no<br>Comorbidity: other   | I1:<br>Transtheoretical model-chronic disease care group<br>I2: Augmented usual care                                        | Wt                                                                         |
| Logue, E. E. 2012<br>(10.5993/ajhb.36.3.4)                 | US | Head-to-head intervention  | 40 (87)  | 0 (0)   | 3  | 0 (0)   | Other focus: no<br>Inclusion criteria: no<br>Comorbidity: other   | I1: Better Weight<br>I2: Better Weight Better Sleep                                                                         | SE; SQ; S                                                                  |

|                                                      |    |                             |          |         |    |        |                                                                   |                                                                                                                                                              |                                                                                         |
|------------------------------------------------------|----|-----------------------------|----------|---------|----|--------|-------------------------------------------------------------------|--------------------------------------------------------------------------------------------------------------------------------------------------------------|-----------------------------------------------------------------------------------------|
| Lubans, D. R. 2012<br>(10.1186/1479-5868-9-45)       | AU | Intervention vs usual care  | 0 (0)    | 41 (7)  | 3  | 33 (4) | Other focus: no<br>Inclusion criteria: no<br>Comorbidity: other   | I1: Usual care<br>I2: Healthy Dads, Healthy Kids intervention group                                                                                          | DH; PA; Wt                                                                              |
| Ma, J. 2015<br>(10.1513/AnnalsATS.201406-271OC)      | US | Head-to-head intervention   | 233 (71) | 48 (12) | 12 | 38 (6) | Other focus: yes<br>Inclusion criteria: yes<br>Comorbidity: other | I1: Enhanced usual care<br>I2: Enhanced usual care + 12-month lifestyle intervention                                                                         | PA; PAEE; BMI; Wt; WC                                                                   |
| Mahdavi, R. 2016<br>(10.5812/ircmj.24390)            | IR | Head-to-head intervention   | 90 (100) | 28 (7)  | 6  | 33 (3) | Other focus: no<br>Inclusion criteria: no<br>Comorbidity: other   | I1: Diet group<br>I2: Diet + education group                                                                                                                 | BMI; Wt                                                                                 |
| Morgan, P. J. 2012<br>(10.1097/JOM.0b013e31824329ab) | AU | Intervention vs usual care* | 0 (0)    | 44 (9)  | 3  | 31 (4) | Other focus: no<br>Inclusion criteria: no<br>Comorbidity: other   | I1: Usual care<br>I2: Workplace POWER (Preventing Obesity Without Eating like a Rabbit) program group                                                        | M + RTC; SQ; CSD consum.; CHO; FV consum.; HR MON; PA; PAEE; BMI; Wt; WC; SBP; DBP; QoL |
| Ross, K. M. 2016<br>(10.1002/oby.21536)              | US | Head-to-head intervention   | 69 (86)  | 51 (12) | 6  | 33 (3) | Other focus: no<br>Inclusion criteria: no<br>Comorbidity: other   | I1: Standard self-monitoring Tools condition<br>I2: technology-based self-monitoring tools condition<br>I3: technology-based tools combined with phone-based | SM DI; Wt                                                                               |

|                                                      |    |                            |           |         |     |        |                                                                   |                                                                 |                                              |
|------------------------------------------------------|----|----------------------------|-----------|---------|-----|--------|-------------------------------------------------------------------|-----------------------------------------------------------------|----------------------------------------------|
|                                                      |    |                            |           |         |     |        |                                                                   | intervention condition                                          |                                              |
| Rothberg, A. 2016 (10.1016/j.fertnstert.2016.06.004) | US | Intervention vs usual care | 14 (100)  | 32 (4)  | 3   | 41 (3) | Other focus: no<br>Inclusion criteria: no<br>Comorbidity: other   | I1: Usual care<br>I2: Intensive weight loss intervention        | BMI; Wt; SBP; DBP; QoL; DEPR                 |
| Rothert, K. 2006 (10.1038/oby.2006.34)               | US | Head-to-head intervention  | 2370 (83) | 45 (12) | 1   | 32 (4) | Other focus: no<br>Inclusion criteria: no<br>Comorbidity: other   | I1: Information-only group<br>I2: Tailored expert system group  | Wt                                           |
| Rshikesan, P. B. 2016 (10.7860/JCDR/2016/2720.8940)  | IN | Intervention vs usual care | 0 (0)     | 41 (10) | 6   | 28 (2) | Other focus: no<br>Inclusion criteria: no<br>Comorbidity: other   | I1: Usual care<br>I2: Integrated approach of yoga therapy group | copg. DIS; WHR; BF; BMI; Wt; WC; SKF; S      |
| Ryan, D. H. 2010 (10.1001/archinternmed.2009.508)    | US | Intervention vs usual care | 326 (84)  | 47 (12) | 24  | 0 (0)  | Other focus: no<br>Inclusion criteria: no<br>Comorbidity: other   | I1: Usual care<br>I2: Intensive medical intervention            | PA; Wt; SBP; DBP                             |
| Salyer, J. 2007 (DOI NOT FOUND)                      | US | Intervention vs usual care | 4 (19)    | 57 (11) | 6   | 0 (0)  | Other focus: yes<br>Inclusion criteria: yes<br>Comorbidity: other | I1: Usual care<br>I2: Commercial weight management program      | Wt; SBP; DBP                                 |
| Samuel-Hodge, Carmen D. 2009 (10.1038/oby.2009.128)  | US | Intervention vs usual care | 143 (100) | 53 (7)  | 4   | 34 (5) | Other focus: no<br>Inclusion criteria: no<br>Comorbidity: other   | I1: Usual care<br>I2: The Weight Wise Program                   | SS; SS; DH; PAI; BF; Wt; SBP; DBP; QoL; DEPR |
| Sheppard, V. B. 2016 (10.1016/j.cct.2015.12.005)     | US | Intervention vs usual care | 31 (100)  | 55 (10) | 3   | 36 (7) | Other focus: no<br>Inclusion criteria: no<br>Comorbidity: other   | I1: Usual care<br>I2: Stepping STONE intervention               | PA; WHR; BMI; Wt; WC                         |
| Smith, T. J. 2010 (10.1016/j.jada.2009.10.039)       | US | Head-to-head intervention  | 37 (33)   | 28 (7)  | 1/2 | 33 (3) | Other focus: no<br>Inclusion criteria: no<br>Comorbidity: other   | I1: Weight to Stay<br>I2: Weight to Stay                        | DH; PA; PAEE; BF; BMI; Wt                    |

|                                                            |    |                            |          |         |    |         |                                                                 | Plus Meal Replacements                                        |                                                                               |
|------------------------------------------------------------|----|----------------------------|----------|---------|----|---------|-----------------------------------------------------------------|---------------------------------------------------------------|-------------------------------------------------------------------------------|
| Marquez, B. 2013<br>(10.1016/j.jand.2013.01.020)           | US | Head-to-head intervention  | 27 (100) | 43 (10) | 6  | 37 (6)  | Other focus: no<br>Inclusion criteria: no<br>Comorbidity: other | I1: Individual Lifestyle Group<br>I2: Partner Lifestyle Group | Prog. ADH; Wt                                                                 |
| McConnon, A. 2007<br>(10.1186/1472-6963-7-206)             | GB | Intervention vs usual care | 170 (77) | 46 (11) | 12 | 34 (5)  | Other focus: no<br>Inclusion criteria: no<br>Comorbidity: other | I1: Usual care<br>I2: Internet group                          | BMI; Wt                                                                       |
| McDoniel, S. O. 2010<br>(10.1111/j.1742-1241.2010.02464.x) | US | Head-to-head intervention  | 43 (58)  | 47 (11) | 6  | 36 (5)  | Other focus: no<br>Inclusion criteria: no<br>Comorbidity: other | I1: Standardised energy restricted plan<br>I2: Metabolic diet | REE; BMI; Wt                                                                  |
| McDoniel, S. O. 2010<br>(10.1016/j.pec.2009.07.034)        | US | Head-to-head intervention  | 69 (62)  | 45 (11) | 3  | 37 (6)  | Other focus: no<br>Inclusion criteria: no<br>Comorbidity: other | I1: Control group<br>I2: SMART group                          | ESE; Wt                                                                       |
| McRobbie, H. 2016<br>(10.3310/hta20790)                    | GB | Head-to-head intervention  | 236 (72) | 46 (15) | 2  | 35 (4)  | Other focus: no<br>Inclusion criteria: no<br>Comorbidity: other | I1: Weight Action programme<br>I2: practice nurse (control)   | KNWL; DH; PA; BMI; Wt; WC; SBP; DBP                                           |
| Mitchell, D. C. 2015<br>(10.1097/jom.0000000000000535)     | US | Intervention vs usual care | 183 (72) | 32 (8)  | nr | 29 (0)  | Other focus: no<br>Inclusion criteria: no<br>Comorbidity: other | I1: Usual care<br>I2: Intervention                            | Fb consum.; FV consum.; PA; BMI; Wt; WC                                       |
| Melchart, D. 2017<br>(10.2147/dmso.S135572)                | DE | Intervention vs usual care | 123 (74) | 51 (10) | 12 | 32 (2)  | Other focus: no<br>Inclusion criteria: no<br>Comorbidity: other | I1: Usual care<br>I2: Web-based Individual Health Management  | BF; BMI; Wt; WC; SBP; DBP                                                     |
| Mensingher, J. L. 2016<br>(10.1016/j.appet.2016.01.033.)   | US | Head-to-head intervention  | 80 (100) | 40 (4)  | 6  | 38 (62) | Other focus: no<br>Inclusion criteria: no<br>Comorbidity: other | I1: Weight-Loss Program<br>I2: Weight-Neutral Program         | cogp. DIS; DH; ME; FV consum.; PAI; WHR; HS; BMI; Wt; WC; SBP; DBP; QoL; DEPR |

|                                                        |    |                                  |           |            |     |        |                                                                   |                                                                                                                                                         |                                |
|--------------------------------------------------------|----|----------------------------------|-----------|------------|-----|--------|-------------------------------------------------------------------|---------------------------------------------------------------------------------------------------------------------------------------------------------|--------------------------------|
| Micco, N. 2007<br>(10.1207/s15324796a<br>bm3301_6)     | US | Head-to-<br>head<br>intervention | 123 (83)  | 47<br>(11) | 12  | 32 (4) | Other focus: no<br>Inclusion criteria: no<br>Comorbidity: other   | I1: Internet only<br>intervention<br>I2: Internet+In-<br>person<br>intervention                                                                         | SS; Wt                         |
| Miller, G. D. 2017<br>(10.1007/s12603-017-<br>0892-5)  | US | Head-to-<br>head<br>intervention | 273 (60)  | 66 (6)     | 18  | 34 (4) | Other focus: yes<br>Inclusion criteria: yes<br>Comorbidity: other | I1: Exercise<br>intervention<br>I2: Diet<br>intervention<br>I3: Exercise + Diet<br>intervention                                                         | PI; Fb consum.;<br>PA; Wt; QoL |
| Miller, G. D. 2011<br>(10.1007/s12603-011-<br>0152-z.) | US | Head-to-<br>head<br>intervention | 316 (72)  | 69 (7)     | 18  | 34 (6) | Other focus: yes<br>Inclusion criteria: yes<br>Comorbidity: other | I1: Healthy<br>Lifestyle Controls<br>I2: Dietary Weight<br>Loss<br>I3: Structured<br>Exercise<br>I4: Combined<br>Exercise and<br>Dietary Weight<br>Loss | PI; Wt                         |
| Mirkarimi, K. 2017<br>(0.26719/2017.23.8.54<br>3)      | IR | Intervention<br>vs usual care    | 60 (100)  | 38 (9)     | 0.5 | 29 (2) | Other focus: no<br>Inclusion criteria: no<br>Comorbidity: other   | I1: Usual care<br>I2: Motivational<br>interviewing                                                                                                      | SE; WHR; BMI;<br>Wt; WC        |
| Mirkarimi, K. 2017<br>(PMID: 28360445)                 | IR | Head-to-<br>head<br>intervention | 100 (100) | 38 (9)     | 0.5 | 27 (2) | Other focus: no<br>Inclusion criteria: no<br>Comorbidity: other   | I1: Motivational<br>interviewing<br>I2: Nutrition<br>education                                                                                          | ESE; BMI                       |
| Mummah, S. 2017<br>(10.1186/s12966-017-<br>0563-2)     | US | Intervention<br>vs usual care    | 135 (62)  | 40 (6)     | 2   | 0 (0)  | Other focus: no<br>Inclusion criteria: no<br>Comorbidity: other   | I1: Usual care<br>I2: the stand-<br>alone, theory-<br>based Vegethon<br>mobile app                                                                      | FV consum.; FV<br>consum.      |

|                                                          |    |                                  |          |            |    |        |                                                                 |                                                                                            |                                                           |
|----------------------------------------------------------|----|----------------------------------|----------|------------|----|--------|-----------------------------------------------------------------|--------------------------------------------------------------------------------------------|-----------------------------------------------------------|
| Ng, L. B. 2014<br>(10.1177/2010105814<br>02300205)       | SG | Intervention<br>vs usual care    | 200 (85) | 51<br>(13) | 6  | 27 (4) | Other focus: no<br>Inclusion criteria: no<br>Comorbidity: other | I1: Usual care<br>I2: A brief Low-<br>intensity<br>Therapeutic<br>Lifestyle<br>Counselling | BMI; Wt                                                   |
| Nurkkala, M. 2015<br>(10.1016/j.eatbeh.201<br>5.05.009.) | FI | Intervention<br>vs usual care    | 120 (78) | 45<br>(11) | 9  | 36 (5) | Other focus: no<br>Inclusion criteria: no<br>Comorbidity: other | I1: Usual care<br>I2: Lifestyle<br>intervention                                            | BMI; Wt                                                   |
| O'Brien, T. 2016<br>(10.1097/CIN.0000000<br>000000275.)  | US | Head-to-<br>head<br>intervention | 24 (100) | 69 (0)     | 3  | 34 (8) | Other focus: no<br>Inclusion criteria: no<br>Comorbidity: other | I1: Lose It Group<br>I2: Wellness Group                                                    | ESE; FV consum.                                           |
| Oddone, E. Z. 2018<br>(10.1007/s11606-018-<br>4398-6)    | US | Intervention<br>vs usual care    | 517 (31) | 56<br>(12) | 6  | 0 (0)  | Other focus: no<br>Inclusion criteria: no<br>Comorbidity: other | I1: Usual care<br>I2: Intervention                                                         | Pat. A                                                    |
| Olsson, S. J. 2015<br>(10.1186/s12889-015-<br>2036-3.)   | SE | Intervention<br>vs usual care    | 101 (57) | 67 (0)     | 6  | 0 (0)  | Other focus: no<br>Inclusion criteria: no<br>Comorbidity: other | I1: Usual care<br>I2: Individualized<br>physical activity on<br>prescription (PAP)         | QoL                                                       |
| Ostbye, T. 2015<br>(10.1097/jom.000000<br>0000000335)    | US | Head-to-<br>head<br>intervention | 550 (83) | 0 (0)      | 12 | 37 (6) | Other focus: no<br>Inclusion criteria: no<br>Comorbidity: other | I1: Weight<br>Management<br>I2: Weight<br>Management Plus                                  | F consum.; CSD<br>consum.; FV<br>consum.; ACM;<br>ST; BMI |
| Solbrig, L. 2018<br>(10.1038/s41366-018-<br>0122-1)      | GB | Head-to-<br>head<br>intervention | 121 (69) | 44<br>(11) | 6  | 33 (6) | Other focus: no<br>Inclusion criteria: no<br>Comorbidity: other | I1: Functional<br>Imagery Training<br>I2: Motivational<br>Interviewing                     | Wt; WC; QoL                                               |
| Sorensen, L. B. 2011<br>(10.3148/72.4.2011.18<br>1)      | DK | Head-to-<br>head<br>intervention | 48 (52)  | 41 (9)     | 5  | 34 (4) | Other focus: no<br>Inclusion criteria: no<br>Comorbidity: other | I1: Neurolinguistics<br>programming<br>group<br>I2: Cooking course                         | WM                                                        |



|                                                                       |    |                               |           |            |    |        |                                                                   |                                                                                                                                     |                                                                 |
|-----------------------------------------------------------------------|----|-------------------------------|-----------|------------|----|--------|-------------------------------------------------------------------|-------------------------------------------------------------------------------------------------------------------------------------|-----------------------------------------------------------------|
| Spring, B. 2017<br>(10.1002/oby.21842)                                | US | Head-to-head<br>intervention  | 96 (84)   | 39<br>(12) | 6  | 35 (3) | Other focus: no<br>Inclusion criteria: no<br>Comorbidity: other   | I1: Standard<br>I2: Technology<br>supported<br>I3: Self-guided                                                                      | ADH measure;<br>ADH D; ADH Ex;<br>Wt                            |
| von Gruenigen, V.<br>2012<br>(10.1097/01.IGC.0000<br>422085.58592.d3) | US | Intervention<br>vs usual care | 75 (100)  | 58<br>(10) | 12 | 36 (8) | Other focus: yes<br>Inclusion criteria: yes<br>Comorbidity: other | I1: Usual care<br>I2: SUCCEED                                                                                                       | FV consum.; PA;<br>BMI; Wt; WC                                  |
| Wekker, V. 2018<br>(10.1371/journal.pone<br>.0205934)                 | NL | Intervention<br>vs usual care | 577 (100) | 30 (4)     | 6  | 36 (3) | Other focus: yes<br>Inclusion criteria: yes<br>Comorbidity: other | I1: Usual care<br>I2: Lifestyle<br>intervention                                                                                     | BMI; Wt; WC;<br>SBP; DBP; Met<br>S; SF                          |
| West, D. S. 2016<br>(10.1002/oby.21645)                               | US | Head-to-head<br>intervention  | 357 (90)  | 48<br>(10) | 18 | 36 (6) | Other focus: no<br>Inclusion criteria: no<br>Comorbidity: other   | I1: Internet<br>behavioral weight<br>control treatment<br>I2: Internet<br>behavioral weight<br>control treatment<br>+ individual MI | SM DI; SM PA;<br>SM Wt; Wt                                      |
| Chang, M. W. 2017<br>(10.1002/oby.21862)                              | US | Intervention<br>vs usual care | 612 (100) | 29 (5)     | 4  | 32 (4) | Other focus: no<br>Inclusion criteria: no<br>Comorbidity: other   | I1: Usual care<br>I2: community-<br>based lifestyle<br>behavioral<br>intervention                                                   | ESE; copg. DIS;<br>SS; F consum.;<br>CSD consum.;<br>FV consum. |
| Cadmus-Bertram, L.<br>2013<br>(10.1002/pon.3219)                      | US | Intervention<br>vs usual care | 50 (100)  | 61 (6)     | 3  | 32 (6) | Other focus: no<br>Inclusion criteria: no<br>Comorbidity: other   | I1: Usual care<br>I2: phone and<br>web-based<br>intervention                                                                        | PA; TS; HS; BMI;<br>Wt; WC                                      |
| Saslow, L. R. 2017<br>(10.2196/jmir.5806)                             | US | Head-to-head<br>intervention  | 15 (60)   | 56 (9)     | 4  | 0 (0)  | Other focus: yes<br>Inclusion criteria: yes<br>Comorbidity: other | I1: Create Your<br>Plate Diet (control<br>group)<br>I2: Intervention<br>Group                                                       | Wt; QoL; DEPR;<br>S                                             |

|                                                        |    |                             |           |         |         |        |                                                                   |                                                                                                       |                                              |
|--------------------------------------------------------|----|-----------------------------|-----------|---------|---------|--------|-------------------------------------------------------------------|-------------------------------------------------------------------------------------------------------|----------------------------------------------|
| Sattin, R. W. 2016<br>(10.1007/s10900-015-0071-8)      | US | Head-to-head intervention * | 504 (83)  | 47 (11) | 3       | 36 (7) | Other focus: no<br>Inclusion criteria: no<br>Comorbidity: other   | I1: Health Education<br>I2: Fit Body and Soul                                                         | Prog. ADH; PA; Wt; WC; SBP; DBP; QoL         |
| Schelling, S. 2009<br>(10.1002/eat.20595)              | CH | Head-to-head intervention   | 28 (74)   | 48 (10) | 2       | 33 (3) | Other focus: no<br>Inclusion criteria: no<br>Comorbidity: other   | I1: Relaxion intervention<br>I2: Motivation intervention                                              | SM PA                                        |
| Schübel, R. 2018<br>(10.1093/ajcn/nqy196)              | DE | Head-to-head intervention   | 75 (50)   | 50 (8)  | 3       | 31 (4) | Other focus: no<br>Inclusion criteria: no<br>Comorbidity: other   | I1: Control group<br>I2: Intermittent calorie restriction (ICR)<br>I3: continuous calorie restriction | F consum.; CHO; Fb consum.; PA; PAEE; Wt; WC |
| Shakudo, M. 2011<br>(10.1111/j.1365-2753.2009.01342.x) | JP | Intervention vs usual care  | 20 (19)   | 41 (10) | 3       | 27 (3) | Other focus: yes<br>Inclusion criteria: yes<br>Comorbidity: other | I1: Usual care<br>I2: Group A<br>I3: Group B                                                          | ADH Ex; BMI; SBP; DBP                        |
| Shapiro, J. R. 2012<br>(10.1016/j.yjmed.2012.08.011)   | US | Intervention vs usual care  | 111 (65)  | 42 (12) | 12      | 32 (4) | Other focus: no<br>Inclusion criteria: no<br>Comorbidity: other   | I1: Usual care<br>I2: Text4Diet TM                                                                    | Wt                                           |
| Shaw, P. A. 2017<br>(10.1177/1740774516669679)         | US | Head-to-head intervention   | 225 (87)  | 48 (11) | 120 (0) | 32 (4) | Other focus: no<br>Inclusion criteria: no<br>Comorbidity: other   | I1: active control arm<br>I2: incentive arm                                                           | DH; PA; Wt                                   |
| Sherwood, N. E. 2006<br>(10.1038/sj.ijo.0803295)       | US | Intervention vs usual care  | 1267 (72) | 50 (12) | 24      | 34 (5) | Other focus: no<br>Inclusion criteria: no<br>Comorbidity: other   | I1: Usual care<br>I2: Mail based intervention<br>I3: Phone based intervention                         | Wt                                           |
| Shin, D. W. 2017<br>(10.1002/oby.21731)                | KR | Intervention vs usual care  | 0 (0)     | 28 (5)  | 3       | 30 (3) | Other focus: no<br>Inclusion criteria: no<br>Comorbidity: other   | I1: Usual care<br>I2: Smartcare alone<br>I3: Smartcare with financial incentives                      | DH; PA; BMI; Wt; WC; SBP; DBP                |

|                                                      |    |                            |          |         |    |        |                                                                   |                                                                                     |                                             |
|------------------------------------------------------|----|----------------------------|----------|---------|----|--------|-------------------------------------------------------------------|-------------------------------------------------------------------------------------|---------------------------------------------|
| Silfee, V. 2016<br>(10.1080/13548506.2016.1139144)   | US | Intervention vs usual care | 16 (67)  | 57 (10) | 1  | 37 (7) | Other focus: yes<br>Inclusion criteria: yes<br>Comorbidity: other | I1: Usual care<br>I2: behavioural intervention                                      | ESES; S per D; PA; PAEE; PAI; ST            |
| Silina, V. 2017<br>(10.1080/02813432.2017.1358435)   | LV | Intervention vs usual care | 71 (55)  | 37 (4)  | 12 | 32 (4) | Other focus: no<br>Inclusion criteria: no<br>Comorbidity: other   | I1: Usual care<br>I2: Text messaging (SMS) intervention                             | WHR; BMI; Wt; WC                            |
| Stapleton, P. 2016<br>(10.1111/aphw.12070)           | AU | Head-to-head intervention  | 76 (89)  | 0 (0)   | 2  | 34 (7) | Other focus: no<br>Inclusion criteria: no<br>Comorbidity: other   | I1: Emotional Freedom Techniques<br>I2: Cognitive Behavioural Therapy               | DH; BMI                                     |
| Turner-McGrievy, G. M. 2017<br>(10.1002/oby.21889)   | US | Head-to-head intervention  | 67 (83)  | 48 (12) | 6  | 35 (6) | Other focus: no<br>Inclusion criteria: no<br>Comorbidity: other   | I1: Bite Counter group<br>I2: App group                                             | PA; Wt                                      |
| Spring, B. 2013<br>(10.1001/jamainternmed.2013.1221) | US | Head-to-head intervention  | 11 (16)  | 58 (12) | 12 | 36 (5) | Other focus: no<br>Inclusion criteria: no<br>Comorbidity: other   | I1: MOVE!<br>I2: MOVE! + pda                                                        | Prog. ADH; Wt                               |
| Overgaard, K. 2018<br>(10.1016/j.jsams.2017.10.037)  | DK | Head-to-head intervention  | 29 (49)  | 46 (11) | 1  | 33 (5) | Other focus: no<br>Inclusion criteria: no<br>Comorbidity: other   | I1: SitLess group to reduce sedentary behavior<br>I2: ExMore group to increase MVPA | ACM; TS; ST                                 |
| Padwal, R. S. 2017<br>(10.1186/s12916-017-0808-6)    | CA | Head-to-head intervention  | 540 (83) | 40 (10) | 3  | 48 (7) | Other focus: no<br>Inclusion criteria: no<br>Comorbidity: other   | I1: WWCM in-person<br>I2: WWCM web-based<br>I3: Mailed literature                   | SE; BMI; Wt; SBP; DBP; QoL; QoL; QoL; DEPR  |
| Parikh, P. 2010<br>(10.2105/ajph.2009.170910)        | US | Intervention vs usual care | 84 (85)  | 48 (17) | nr | 32 (5) | Other focus: no<br>Inclusion criteria: no<br>Comorbidity: other   | I1: Usual care<br>I2: Intervention-workshop                                         | F consum.; FV consum.; PA; Wt; WC; SBP; DBP |

|                                                        |    |                                       |          |            |    |        |                                                                 |                                                                                                                                     |                                                     |
|--------------------------------------------------------|----|---------------------------------------|----------|------------|----|--------|-----------------------------------------------------------------|-------------------------------------------------------------------------------------------------------------------------------------|-----------------------------------------------------|
| Patrick, K. 2009<br>(10.2196/jmir.1100)                | US | Intervention<br>vs usual care         | 41 (52)  | 45 (8)     | 4  | 33 (4) | Other focus: no<br>Inclusion criteria: no<br>Comorbidity: other | I1: Usual care<br>I2: SMS<br>intervention                                                                                           | DH; Wt                                              |
| Penn, L. 2009<br>(10.1186/1471-2458-9-342)             | GB | Intervention<br>vs usual care         | 61 (60)  | 56<br>(26) | 60 | 34 (5) | Other focus: no<br>Inclusion criteria: no<br>Comorbidity: other | I1: Usual care<br>I2: Intervention<br>group                                                                                         | Wt                                                  |
| Petrella, R. J. 2017<br>(10.1249/mss.0000000000001380) | CA | Intervention<br>vs usual<br>care*     | 0 (0)    | 49 (9)     | nr | 37 (6) | Other focus: no<br>Inclusion criteria: no<br>Comorbidity: other | I1: Usual care<br>I2: Hockey FIT<br>program                                                                                         | DH; PA; TS; PAI;<br>BMI; WC; SBP;<br>DBP; QoL; DEPR |
| Pett, M. 2013<br>(10.1352/1944-7558-118.3.224)         | US | Head-to-<br>head<br>intervention      | 13 (57)  | 25 (4)     | 3  | 38 (7) | Other focus: no<br>Inclusion criteria: no<br>Comorbidity: other | I1: Young<br>adults+parents<br>I2: Young adult<br>intervention                                                                      | ESES; BMI; Wt;<br>SBP; DBP                          |
| Peyer, K. L. 2017<br>(10.1016/j.pmedr.2017.03.002)     | US | Head-to-<br>head<br>intervention      | 54 (60)  | 39<br>(15) | 2  | 37 (6) | Other focus: no<br>Inclusion criteria: no<br>Comorbidity: other | I1: Guided weight<br>loss<br>I2: Physical activity<br>monitor<br>I3: Physical activity<br>monitor and<br>guided weight loss         | Wt; Met S                                           |
| Phillips, E. G. 2017<br>(10.1002/oby.21780)            | US | Head-to-<br>head<br>intervention<br>* | 360 (90) | 48<br>(14) | 12 | 34 (6) | Other focus: no<br>Inclusion criteria: no<br>Comorbidity: other | I1: Small change<br>intervention<br>I2: PA/SA + small<br>change<br>intervention                                                     | Wt                                                  |
| Polzien, K. M. 2007<br>(10.1038/oby.2007.584)          | US | Head-to-<br>head<br>intervention      | 57 (100) | 41 (9)     | 3  | 33 (3) | Other focus: no<br>Inclusion criteria: no<br>Comorbidity: other | I1: Standard In-<br>Person<br>Behavioural<br>Weight Control<br>Program<br>I2: Intermittent<br>Technology-Based<br>Behavioral Weight | DH; Prog. ADH;<br>PA; Wt                            |

|                                                              |    |                                  |          |            |    |        |                                                                   | Control Program<br>I3: Continuous<br>Technology-Based<br>Behavioral Weight<br>Control Program                     |                                                                                        |
|--------------------------------------------------------------|----|----------------------------------|----------|------------|----|--------|-------------------------------------------------------------------|-------------------------------------------------------------------------------------------------------------------|----------------------------------------------------------------------------------------|
| Ptomey, L. T. 2018<br>(10.1111/jar.12348)                    | US | Head-to-<br>head<br>intervention | 85 (57)  | 37<br>(12) | 18 | 37 (8) | Other focus: no<br>Inclusion criteria: no<br>Comorbidity: other   | I1: Enhanced stop<br>light diet<br>I2: Conventional<br>diet                                                       | F consum.; FV<br>consum.; BMI;<br>Wt; WC                                               |
| Rader, S. 2017<br>(10.1007/s00508-017-<br>1198-7)            | AT | Head-to-<br>head<br>intervention | 57 (100) | 48<br>(11) | 12 | 0 (0)  | Other focus: no<br>Inclusion criteria: no<br>Comorbidity: other   | I1: The web-based<br>intervention group<br>I2: The printed<br>manual<br>intervention group                        | ESES; ESE                                                                              |
| Raja-Khan, N. 2017<br>(10.1002/oby.21910)                    | US | Head-to-<br>head<br>intervention | 86 (100) | 45<br>(13) | 2  | 39 (9) | Other focus: no<br>Inclusion criteria: no<br>Comorbidity: other   | I1: MBSR<br>I2: health<br>education                                                                               | SE; SQ; QoL; S                                                                         |
| Rapoport, L. 2000<br>(10.1038/sj.ijo.080146<br>5)            | GB | Head-to-<br>head<br>intervention | 75 (100) | 47<br>(11) | 3  | 35 (6) | Other focus: no<br>Inclusion criteria: no<br>Comorbidity: other   | I1: Standard-<br>cognitive<br>behavioral therapy<br>I2: Modified-<br>cognitive<br>behavioral therapy              | Copg. DIS; DH;<br>PA; HR MON;<br>WHR; HS; BMI;<br>Wt; WC; SBP;<br>DBP; QoL; DEPR;<br>S |
| Reeves, M. 2017<br>(10.1111/ajco.12629)                      | AU | Intervention<br>vs usual care    | 90 (100) | 55 (9)     | 6  | 31 (4) | Other focus: yes<br>Inclusion criteria: yes<br>Comorbidity: other | I1: Usual care<br>I2: weight loss<br>intervention:                                                                | Copg. DIS; Wt;<br>WC; QoL                                                              |
| Richardson, C. R. 2016<br>(10.1249/tjx.00000000<br>00000017) | US | Head-to-<br>head<br>intervention | 0 (0)    | 56<br>(10) | 6  | 36 (5) | Other focus: no<br>Inclusion criteria: no<br>Comorbidity: other   | I1: Time-based<br>I2: Simple<br>pedometer with<br>manual step count<br>logging<br>I3: Uploading<br>pedometer with | ACM; Wt; QoL                                                                           |

|                                                                   |    |                                   |           |            |    |        |                                                                   | Internet mediated<br>step count                                                                                                                                                                |                                        |
|-------------------------------------------------------------------|----|-----------------------------------|-----------|------------|----|--------|-------------------------------------------------------------------|------------------------------------------------------------------------------------------------------------------------------------------------------------------------------------------------|----------------------------------------|
| Rieger, E. 2017<br>(10.1016/j.brat.2017.04.012)                   | AU | Head-to-head<br>intervention      | 148 (74)  | 47<br>(12) | 12 | 38 (6) | Other focus: no<br>Inclusion criteria: no<br>Comorbidity: other   | I1: Cognitive<br>behaviour therapy<br>weight<br>management<br>program alone<br>I2: Cognitive<br>behaviour therapy<br>weight<br>management<br>program with the<br>addition of<br>support people | ESE; BMI; Wt;<br>WC; QoL; cogp.<br>DIS |
| Rodriguez-Cristobal, J.<br>J. 2017<br>(10.1186/s12875-017-0644-y) | ES | Intervention<br>vs usual<br>care* | 347 (77)  | 57<br>(16) | 24 | 34 (5) | Other focus: no<br>Inclusion criteria: no<br>Comorbidity: other   | I1: Usual care<br>I2: Motivational<br>Intervention                                                                                                                                             | Wt; SBP; DBP                           |
| Rodriguez-Martin, B.<br>C. 2013<br>(10.1016/j.appet.2013.02.006)  | CU | Intervention<br>vs usual care     | 58 (73)   | 39<br>(14) | 3  | 29 (2) | Other focus: no<br>Inclusion criteria: no<br>Comorbidity: other   | I1: Usual care<br>I2: Self-help<br>manual                                                                                                                                                      | BMI                                    |
| Stolley, M. 2017<br>(10.1200/jco.2016.71.9856)                    | US | Head-to-head<br>intervention      | 246 (100) | 58<br>(10) | 6  | 36 (6) | Other focus: yes<br>Inclusion criteria: yes<br>Comorbidity: other | I1: Guided weight<br>loss program-<br>Moving Forward<br>Interventionist-<br>Guided program<br>I2: Self-guided<br>weight loss<br>program                                                        | DH; PA; HS; BF;<br>Wt; WC              |
| Strobl, V. 2013<br>(10.2340/16501977-1095)                        | DE | Intervention<br>vs usual care     | 210 (45)  | 48<br>(10) | 6  | 36 (4) | Other focus: yes<br>Inclusion criteria: yes<br>Comorbidity: other | I1: Usual care<br>I2: Aftercare<br>intervention                                                                                                                                                | PA; BMI; Wt                            |

|                                                         |    |                            |          |         |    |        |                                                                   |                                                                                                 |                                                                |
|---------------------------------------------------------|----|----------------------------|----------|---------|----|--------|-------------------------------------------------------------------|-------------------------------------------------------------------------------------------------|----------------------------------------------------------------|
| Sugawara, N. 2018<br>(10.1016/j.jpsychires.2017.12.002) | JP | Intervention vs usual care | 138 (52) | 46 (10) | 12 | 30 (5) | Other focus: yes<br>Inclusion criteria: yes<br>Comorbidity: other | I1: Usual care<br>I2: doctor's weight loss advice<br>I3: individual nutritional education group | BMI; Wt; WC;<br>SBP; DBP; Met S                                |
| Takahashi, P. Y. 2016<br>(10.2147/cia.S107626)          | US | Intervention vs usual care | 94 (72)  | 63 (15) | 3  | 0 (0)  | Other focus: yes<br>Inclusion criteria: yes<br>Comorbidity: other | I1: Usual care<br>I2: Immediate                                                                 | PA; TS                                                         |
| Tate, D. F. 2007<br>(10.1093/ajcn/85.4.954.)            | US | Head-to-head intervention  | 117 (58) | 42 (6)  | 18 | 32 (3) | Other focus: no<br>Inclusion criteria: no<br>Comorbidity: other   | I1: Standard behavioral treatment<br>I2: High physical activity                                 | DH; F consum.;<br>CHO; PA; Wt                                  |
| Turner-McGrievy, G. 2011<br>(10.2196/jmir.1841)         | US | Head-to-head intervention  | 72 (75)  | 43 (11) | 6  | 33 (5) | Other focus: no<br>Inclusion criteria: no<br>Comorbidity: other   | I1: Podcast group<br>I2: Podcast+Mobile group                                                   | ESE; KNWL; DH;<br>F consum.; ADH<br>D; ADH Ex; PA;<br>PAEE; Wt |
| Carels, Robert A. 2007<br>(10.1037/0278-6133.26.3.369.) | US | Head-to-head intervention  | 46 (84)  | 48 (10) | 6  | 0 (0)  | Other focus: no<br>Inclusion criteria: no<br>Comorbidity: other   | I1: behavioural weight loss program<br>I2: behavioural weight loss program + Stepped care       | Wt                                                             |
| Cancian, A. C. M. 2017<br>(10.1007/s40519-017-0461-2)   | BR | Intervention vs usual care | 55 (92)  | 40 (9)  | 2  | 0 (0)  | Other focus: no<br>Inclusion criteria: no<br>Comorbidity: other   | I1: Usual care<br>I2: Dialectical behaviour therapy                                             | Copg. DIS; ME;<br>DEPR; S; ANX                                 |
| Byrne, N. M. 2006<br>(10.1038/oby.2006.205)             | AU | Intervention vs usual care | nr       | 38 (5)  | 8  | 29 (2) | Other focus: no<br>Inclusion criteria: no<br>Comorbidity: other   | I1: Usual care<br>I2: personalized weight management program                                    | Wt; WC                                                         |

|                                                         |    |                            |          |         |    |        |                                                                   |                                                                                                                |                                     |
|---------------------------------------------------------|----|----------------------------|----------|---------|----|--------|-------------------------------------------------------------------|----------------------------------------------------------------------------------------------------------------|-------------------------------------|
| Burke, V. 2005<br>(10.1097/01.hjh.0000170388.61579.4f)  | AU | Intervention vs usual care | 134 (56) | 55 (7)  | 4  | 30 (3) | Other focus: yes<br>Inclusion criteria: no<br>Comorbidity: other  | I1: Usual care<br>I2: Lifestyle programme                                                                      | Wt; WC; SBP; DBP                    |
| Burke, L. E. 2017<br>(10.1016/j.pmedr.2017.03.017)      | US | Head-to-head intervention  | 34 (87)  | 45 (13) | 3  | 34 (4) | Other focus: no<br>Inclusion criteria: no<br>Comorbidity: other   | I1: Self-monitoring group<br>I2: Self-monitoring + Feedback group<br>I3: Self-monitoring +FB + lifestyle group | SE; Prog. ADH; Wt; SBP; DBP         |
| Bolognesi, M. 2006<br>(10.1207/s15324796a bm3102_10)    | IT | Intervention vs usual care | 51 (53)  | 0 (0)   | 6  | 31 (1) | Other focus: no<br>Inclusion criteria: no<br>Comorbidity: other   | I1: Usual care<br>I2: Physical activity counseling                                                             | BMI; WC                             |
| Bergman, F. 2018<br>(10.1016/S2468-2667(18)30163-4)     | SE | Intervention vs usual care | 44 (55)  | 52 (7)  | 13 | 0 (0)  | Other focus: no<br>Inclusion criteria: no<br>Comorbidity: other   | I1: Usual care<br>I2: Treadmill                                                                                | TS; PAI; ST                         |
| Bennett, G. G. 2018<br>(10.1016/j.amepre.2018.07.005)   | US | Intervention vs usual care | 239 (68) | 51 (9)  | 12 | 36 (4) | Other focus: yes<br>Inclusion criteria: yes<br>Comorbidity: other | I1: Usual care<br>I2: App self-monitoring                                                                      | BMI; WC                             |
| Bennett, G. G. 2010<br>(10.1038/oby.2009.242)           | US | Intervention vs usual care | 84 (47)  | 54 (8)  | 3  | 35 (3) | Other focus: yes<br>Inclusion criteria: no<br>Comorbidity: other  | I1: Usual care<br>I2: Web-based weight loss program                                                            | Wt                                  |
| Bender, M. S. 2018<br>(10.1016/j.conctc.2018.09.004)    | PH | Intervention vs usual care | 35 (52)  | 42 (12) | 3  | 31 (4) | Other focus: no<br>Inclusion criteria: no<br>Comorbidity: other   | I1: Usual care<br>I2: Fit&Trim program                                                                         | BMI; Wt; WC                         |
| Befort, Christie A. 2008<br>(10.1007/s10865-008-9161-8) | US | Head-to-head intervention  | 44 (100) | 44 (12) | 4  | 40 (6) | Other focus: no<br>Inclusion criteria: no<br>Comorbidity: other   | I1: Behavioural loss program + Motivational interview<br>I2: Behavioural loss program + health education       | ESES; ESE; FV consum.; ACM; BMI; Wt |



|                                                         |    |                             |           |         |     |        |                                                                   |                                                                                  |                                                             |
|---------------------------------------------------------|----|-----------------------------|-----------|---------|-----|--------|-------------------------------------------------------------------|----------------------------------------------------------------------------------|-------------------------------------------------------------|
| Befort, C. A. 2010<br>(10.1016/j.eatbeh.2009.08.002)    | US | Head-to-head intervention   | 34 (100)  | 48 (12) | 6   | 34 (5) | Other focus: no<br>Inclusion criteria: no<br>Comorbidity: other   | I1: group phone counseling<br>I2: individual phone counseling                    | F consum.; FV consum.; PAI; Wt                              |
| Beebe, N. 2013<br>(10.1089/acm.2012.0531)               | US | Head-to-head intervention   | 32 (100)  | 61 (6)  | 4   | 34 (4) | Other focus: no<br>Inclusion criteria: no<br>Comorbidity: other   | I1: dietary education<br>I2: dietary education + tai chi                         | F consum.; CHO; FV consum.; HS; BMI; Wt; WC                 |
| Bartels, S. J. 2015<br>(10.1176/appi.ajp.2014.14030357) | US | Head-to-head intervention   | 107 (51)  | 44 (11) | nr  | 37 (8) | Other focus: yes<br>Inclusion criteria: yes<br>Comorbidity: other | I1: Access to fitness club<br>I2: In SHAPE                                       | F consum.; CHO; FV consum.; BMI; Wt; WC                     |
| Aoike, D. T. 2015<br>(10.1007/s11255-014-0894-8)        | BR | Intervention vs usual care  | 10 (35)   | 55 (8)  | 3   | 31 (4) | Other focus: yes<br>Inclusion criteria: yes<br>Comorbidity: other | I1: Usual care<br>I2: home-based aerobic exercise                                | BF; BMI; Wt; SBP; DBP                                       |
| Anglin, J. C. 2012<br>(10.1177/0260106012459994)        | US | Head-to-head intervention   | nr        | 0 (0)   | 1,5 | 34 (6) | Other focus: no<br>Inclusion criteria: no<br>Comorbidity: other   | I1: calorie restriction<br>I2: Intuitive eating                                  | BMI; Wt; WC                                                 |
| Andrade, A. M. 2010<br>(10.1016/j.pec.2010.01.006)      | BR | Head-to-head intervention   | 239 (100) | 38 (7)  | 12  | 31 (4) | Other focus: no<br>Inclusion criteria: no<br>Comorbidity: other   | I1: Control<br>I2: Intervention                                                  | ESES; ESE; cogp. DIS; DH; PA; TS; BMI; Wt                   |
| Anderson, J. W. 2011<br>(10.3810/pgm.2011.09.2476)      | US | Head-to-head intervention   | 34 (76)   | 48 (9)  | 5,5 | 35 (2) | Other focus: no<br>Inclusion criteria: no<br>Comorbidity: other   | I1: Meal replacement fruits and vegetables<br>I2: Control                        | Wt; WC                                                      |
| Almeida, F. A. 2015<br>(10.1002/oby.20899.)             | US | Head-to-head intervention * | 1321 (74) | 47 (3)  | 12  | 33 (6) | Other focus: no<br>Inclusion criteria: no<br>Comorbidity: other   | I1: Internet-based intervention with monetary incentives<br>I2: Living my weight | F consum.; CSD consum.; Fb consum.; FV consum.; PA; BMI; Wt |
| Alizadeh, Z. 2013 (DOI NOT FOUND)                       | IR | Intervention vs usual care  | 45 (100)  | 33 (8)  | 3   | 31 (4) | Other focus: no<br>Inclusion criteria: no<br>Comorbidity: other   | I1: Usual care<br>I2: Continuous exercise                                        | DH; BMI; Wt; WC                                             |

|                                                             |    |                            |           |         |      |        |                                                                   |                                                                                                                    |                       |
|-------------------------------------------------------------|----|----------------------------|-----------|---------|------|--------|-------------------------------------------------------------------|--------------------------------------------------------------------------------------------------------------------|-----------------------|
|                                                             |    |                            |           |         |      |        |                                                                   | I3: Intermittent exercise                                                                                          |                       |
| Alghamdi, R. Q. 2017<br>(10.15537/smj.2017.8.20553)         | SA | Intervention vs usual care | 70 (50)   | 36 (10) | 3    | 39 (6) | Other focus: no<br>Inclusion criteria: no<br>Comorbidity: other   | I1: Usual care<br>I2: Intensive lifestyle intervention                                                             | BMI; Wt; WC; SBP; DBP |
| Ahrens, Renee A. 2003<br>(10.1331/154434503322452210.)      | US | Head-to-head intervention  | nr        | 48 (9)  | 5    | 29 (2) | Other focus: no<br>Inclusion criteria: no<br>Comorbidity: other   | I1: Meal replacement<br>I2: Reduced-calorie diet                                                                   | Wt; WC; SBP; DBP      |
| Ahern, A. L. 2017<br>(10.1016/s0140-6736(17)30647-5)        | GB | Head-to-head intervention  | 862 (68)  | 53 (14) | 0.03 | 35 (5) | Other focus: no<br>Inclusion criteria: no<br>Comorbidity: other   | I1: brief intervention<br>I2: 12-week programme<br>I3: 52-week programme                                           | Wt; WC; SBP; DBP; QoL |
| Adachi, Y. 2007<br>(10.1016/j.brat.2006.03.017)             | JP | Head-to-head intervention  | 205 (100) | 46 (10) | 7    | 26 (2) | Other focus: no<br>Inclusion criteria: no<br>Comorbidity: other   | I1: full KT program + self-monitoring<br>I2: full KT program<br>I3: KT booklet + self-monitoring<br>I4: KT booklet | BMI; Wt               |
| Van Gemert, W. A. M. 2015<br>(10.1371/journal.pone.0127520) | NL | Intervention vs usual care | 240 (100) | 60 (5)  | 4    | 29 (3) | Other focus: no<br>Inclusion criteria: no<br>Comorbidity: other   | I1: Usual care<br>I2: diet group<br>I3: exercise group                                                             | Wt; QoL               |
| Hinderliter, A. L. 2014<br>(10.1093/ajh/hpt183)             | US | Intervention vs usual care | 96 (67)   | 52 (10) | 4    | 33 (4) | Other focus: yes<br>Inclusion criteria: yes<br>Comorbidity: other | I1: Usual care<br>I2: Dietary Approaches to Stop Hypertension<br>I3: Dietary Approaches to Stop Hypertension       | Wt; SBP; DBP          |

|                                                         |    |                            |           |         |    |        |                                                                         |                                                                                                                                                   |                                              |
|---------------------------------------------------------|----|----------------------------|-----------|---------|----|--------|-------------------------------------------------------------------------|---------------------------------------------------------------------------------------------------------------------------------------------------|----------------------------------------------|
|                                                         |    |                            |           |         |    |        |                                                                         | + behavioural weight management                                                                                                                   |                                              |
| Hernández-Cordero, S. 2014 (10.3945/jn.114.1934 90. )   | MX | Head-to-head intervention  | 268 (100) | 33 (7)  | 9  | 31 (4) | Other focus: no<br>Inclusion criteria: no<br>Comorbidity: other         | I1: water and education provision<br>I2: education provision                                                                                      | CSD consum.;<br>BF; BMI; Wt;<br>WC; SBP; DBP |
| Fernández-Ruiz, Virginia E. 2018 ( 10.1111/ijn.12690. ) | ES | Intervention vs usual care | 37 (50)   | 61 (9)  | 12 | 33 (4) | Other focus: no<br>Inclusion criteria: no<br>Comorbidity: other         | I1: Usual care<br>I2: multidisciplinary program                                                                                                   | WHR; HS; BF;<br>BMI; Wt; WC                  |
| Ewert, Carola Pérez 2016 (DOI NOT FOUND)                | CL | Intervention vs usual care | 46 (66)   | 53 (9)  | 9  | 30 (2) | Other focus: no<br>Inclusion criteria: no<br>Comorbidity: other         | I1: Usual care<br>I2: Modelo multicomponent                                                                                                       | PA; HS; Wt                                   |
| Teeriniemi, A. M. 2018 (10.1111/joim.12802)             | FI | Intervention vs usual care | 262 (56)  | 46 (10) | 24 | 31 (2) | Other focus: no<br>Inclusion criteria: no<br>Comorbidity: other         | I1: Usual care<br>I2: Control + HBCSS<br>I3: CBT-counselling<br>I4: CBT-counselling + HBCSS<br>I5: SHG-counselling<br>I6: SHG-counselling + HBCSS | BMI; Wt; WC                                  |
| Eaton, C. B. 2016 (10.1370/afm.1952)                    | US | Head-to-head intervention  | 167 (79)  | 49 (12) | 24 | 38 (7) | Other focus: yes<br>Inclusion criteria: no<br>Comorbidity: hypertension | I1: Standard intervention<br>I2: Enhanced intervention                                                                                            | PA; BMI; Wt                                  |
| Hardcastle, Sarah 2008                                  | GB | Intervention vs usual care | 216 (65)  | 51 (1)  | 6  | 34 (0) | Other focus: no<br>Inclusion criteria: no<br>Comorbidity: other         | I1: Usual care<br>I2: Counselling                                                                                                                 | DH; PA; BMI;<br>Wt; SBP; DBP                 |

| (10.1016/j.pec.2007.09.014)                  |    |                             |           |         |    |        |                                                                 | intervention (treatment)                                                                                                     |                                                     |
|----------------------------------------------|----|-----------------------------|-----------|---------|----|--------|-----------------------------------------------------------------|------------------------------------------------------------------------------------------------------------------------------|-----------------------------------------------------|
| Ash, S. 2006 (10.1038/sj.ijo.0803263)        | AU | Intervention vs usual care  | 144 (75)  | 48 (13) | 2  | 35 (6) | Other focus: no<br>Inclusion criteria: no<br>Comorbidity: other | I1: Usual care<br>I2: Individualized dietetic treatment<br>I3: Group-based cognitive behavior therapy lifestyle intervention | SE; WM; BMI; Wt; WC                                 |
| Davis Martin, P. 2006 (10.1038/oby.2006.160) | US | Intervention vs usual care* | 144 (100) | 42 (12) | 6  | 39 (8) | Other focus: no<br>Inclusion criteria: no<br>Comorbidity: other | I1: Usual care<br>I2: tailored weight management interventions                                                               | Wt                                                  |
| Berry, D. 2015 (DOI NOT FOUND)               | US | Intervention vs usual care  | 60 (100)  | 27 (6)  | 9  | 34 (6) | Other focus: no<br>Inclusion criteria: no<br>Comorbidity: other | I1: Usual care<br>I2: Community-based weight management                                                                      | SE; Exercise SE; Eating SE; DH; PA; BMI; WC; SKF; S |
| Womble, L. G. 2004 (10.1038/oby.2004.124)    | US | Head-to-head intervention   | 47 (100)  | 44 (10) | 12 | 34 (3) | Other focus: no<br>Inclusion criteria: no<br>Comorbidity: other | I1: eDiets.com - A commercial internet weight loss program group<br>I2: Weight loss manual group                             | WM                                                  |
| Xiao, Tan 2016 (10.3390/nu8110751)           | FI | Intervention vs usual care  | 0 (0)     | 52 (10) | 6  | 29 (3) | Other focus: no<br>Inclusion criteria: no<br>Comorbidity: other | I1: Usual care<br>I2: 6-month diet intervention                                                                              | PA; PAEE; ST; BF; Wt; WC                            |
| Annesi, J. 2013 (10.1123/jpah.10.7.1024.)    | US | Head-to-head intervention   | nr        | 44 (6)  | 6  | 40 (4) | Other focus: no<br>Inclusion criteria: no<br>Comorbidity: other | I1: Nutritional education<br>I2: cognitive-behavioral methods                                                                | ESEE; EE; Eating SE; copg. DIS; FV consum.; PA; Wt  |

|                                                      |    |                             |           |         |    |        |                                                                   |                                                                                    |                                              |
|------------------------------------------------------|----|-----------------------------|-----------|---------|----|--------|-------------------------------------------------------------------|------------------------------------------------------------------------------------|----------------------------------------------|
| Annesi, J. J. 2010<br>(10.1097/MAJ.0b013e3181c175e9) | US | Head-to-head intervention   | 210 (100) | 45 (10) | 6  | 36 (5) | Other focus: no<br>Inclusion criteria: no<br>Comorbidity: other   | I1: control<br>I2: behaviorally based exercise                                     | ESES; copg. DIS                              |
| Annesi, J. J. 2010<br>(10.1016/j.bodyim.2010.05.001) | US | Head-to-head intervention   | 150 (100) | 42 (11) | 6  | 37 (6) | Other focus: no<br>Inclusion criteria: no<br>Comorbidity: other   | I1: Control<br>I2: The coach approach                                              | ESES; copg. DIS; Wt                          |
| Annesi, J. J. 2008<br>(10.7812/tpp/07-134.)          | US | Head-to-head intervention   | 273 (100) | 43 (10) | 6  | 37 (4) | Other focus: no<br>Inclusion criteria: no<br>Comorbidity: other   | I1: Coach approach<br>I2: Coach approach + cultivating health<br>I3: Control group | ESES; copg. DIS; BMI; WC; SBP; DM            |
| Tate, D. F. 2003<br>(10.1001/jama.289.14.1833)       | US | Head-to-head intervention   | 83 (90)   | 49 (9)  | 12 | 33 (4) | Other focus: no<br>Inclusion criteria: no<br>Comorbidity: other   | I1: Basic internet<br>I2: Behavioral e-Counseling                                  | PA; BMI; Wt; WC                              |
| Tate, D. F. 2001<br>(10.1001/jama.285.9.1172.)       | US | Head-to-head intervention   | 81 (89)   | 41 (11) | 6  | 29 (3) | Other focus: no<br>Inclusion criteria: no<br>Comorbidity: other   | I1: Internet education<br>I2: Internet behavior therapy                            | DH; PA; Wt; WC                               |
| Tay, J. 2015<br>(10.3945/ajcn.115.112581.)           | AU | Head-to-head intervention   | 49 (37)   | 58 (7)  | 12 | 35 (4) | Other focus: yes<br>Inclusion criteria: yes<br>Comorbidity: other | I1: Low-carbohydrate diet<br>I2: High-carbohydrate diet                            | DH; PA; BMI; WC; SBP; DBP                    |
| West, D. S. 2011<br>(10.1016/j.amepre.2011.06.041)   | US | Intervention vs usual care* | 84 (37)   | 71 (7)  | 3  | 36 (5) | Other focus: no<br>Inclusion criteria: no<br>Comorbidity: other   | I1: Usual care<br>I2: Lifestyle intervention                                       | Wt                                           |
| Steinberg, D. M. 2013<br>(10.2196/jmir.2844)         | US | Head-to-head intervention   | 50 (100)  | 38 (8)  | 6  | 36 (6) | Other focus: no<br>Inclusion criteria: no<br>Comorbidity: other   | I1: Shaped plan<br>I2: Educational control                                         | BMI; Wt                                      |
| Tanaka, K. 2018<br>(10.2147/jmdh.S165422)            | JP | Intervention vs usual care  | 1 (1)     | 46 (10) | 2  | 28 (3) | Other focus: no<br>Inclusion criteria: no<br>Comorbidity: other   | I1: Usual care<br>I2: Wellness Coach                                               | F consum.; CSD consum.; ME; Wt; WC; SBP; DBP |

|                                                       |    |                                  |          |            |      |        |                                                                   |                                                                                                              |                                                                              |
|-------------------------------------------------------|----|----------------------------------|----------|------------|------|--------|-------------------------------------------------------------------|--------------------------------------------------------------------------------------------------------------|------------------------------------------------------------------------------|
| Tapsell, L. C. 2017<br>(10.1136/bmjopen-2016-014533)  | AU | Intervention<br>vs usual care    | 186 (74) | 45 (2)     | 12   | 32 (1) | Other focus: no<br>Inclusion criteria: no<br>Comorbidity: other   | I1: Usual care<br>I2: Interdisciplinary<br>Intervention                                                      | Copg. DIS; F<br>consum.; CHO;<br>Fb consum.; PA;<br>TS; Wt; SBP;<br>DBP; QoL |
| Young, A. S. 2017<br>(10.1007/s11606-016-3963-0)      | US | Intervention<br>vs usual care    | nr       | 54<br>(10) | 6    | 34 (5) | Other focus: no<br>Inclusion criteria: no<br>Comorbidity: other   | I1: Usual care<br>I2: WebMOVE<br>I3: MOVE SMI                                                                | BMI; Wt                                                                      |
| Thomas, J. G. 2017<br>(10.1002/oby.21846)             | US | Intervention<br>vs usual care    | 210 (77) | 55<br>(12) | 12   | 34 (4) | Other focus: no<br>Inclusion criteria: no<br>Comorbidity: other   | I1: Usual care<br>I2: WWO (Weight<br>Watchers Online)<br>I3: WWO + AL<br>(ActiveLinkVR<br>activity tracking) | PAI; Wt                                                                      |
| Thomas, J. G. 2017<br>(10.1002/osp4.132)              | US | Head-to-<br>head<br>intervention | 77 (84)  | 56<br>(11) | 6    | 34 (4) | Other focus: no<br>Inclusion criteria: no<br>Comorbidity: other   | I1: Weight<br>Watchers Online<br>I2: Weight<br>Watchers Online<br>Enhanced                                   | BMI                                                                          |
| Tuomilehto, H. 2010<br>(10.3945/ajcn.2010.29<br>485.) | FI | Intervention<br>vs usual care    | 19 (23)  | 52 (9)     | 12   | 32 (3) | Other focus: yes<br>Inclusion criteria: yes<br>Comorbidity: other | I1: Usual care<br>I2: Dietary<br>intervention                                                                | BMI; Wt; WC;<br>SBP; DBP                                                     |
| Vincent, D. 2014<br>(10.1177/0145721714<br>521020.)   | US | Head-to-<br>head<br>intervention | 45 (78)  | 51<br>(12) | 5    | 34 (6) | Other focus: no<br>Inclusion criteria: no<br>Comorbidity: other   | I1: Control group<br>I2: Estilo De Vida<br>Saludable group                                                   | ESES; ESE; F<br>consum.; FV<br>consum.; BMI;<br>Wt; WC                       |
| Voils, C. I. 2017<br>(10.7326/m16-2160)               | US | Intervention<br>vs usual care    | 34 (15)  | 62 (8)     | 10,5 | 36 (6) | Other focus: no<br>Inclusion criteria: no<br>Comorbidity: other   | I1: Usual care<br>I2: Maintenance                                                                            | Wt                                                                           |
| Weiss, E. P. 2016<br>(10.3945/ajcn.116.131<br>391)    | US | Head-to-<br>head<br>intervention | 39 (57)  | 57 (5)     | 3    | 28 (2) | Other focus: no<br>Inclusion criteria: no<br>Comorbidity: other   | I1: Calorie<br>Restriction<br>I2: Endurance<br>Exercise training                                             | DH; WHR; BMI;<br>Wt; WC                                                      |

|                                                    |    |                           |          |         |    |        |                                                                 |                                                                           |                                                            |
|----------------------------------------------------|----|---------------------------|----------|---------|----|--------|-----------------------------------------------------------------|---------------------------------------------------------------------------|------------------------------------------------------------|
|                                                    |    |                           |          |         |    |        |                                                                 | I3: Weight loss from calorie restriction and exercise combined            |                                                            |
| Watson, A. 2012<br>(10.2196/jmir.1629)             | US | Head-to-head intervention | 59 (84)  | 42 (0)  | 3  | 30 (0) | Other focus: no<br>Inclusion criteria: no<br>Comorbidity: other | I1: Control group<br>I2: An Internet-Based Virtual Coach                  | TS; BMI                                                    |
| Watson, N. 2016<br>(10.3390/nu8050289)             | AU | Head-to-head intervention | 28 (46)  | 54 (8)  | 5  | 34 (5) | Other focus: no<br>Inclusion criteria: no<br>Comorbidity: other | I1: A High protein diet<br>I2: A High carbohydrate diet                   | DH; F consum.;<br>CHO; PA; WM;<br>BMI; Wt; WC;<br>SBP; DBP |
| Webber, K. H. 2016<br>(10.1016/j.nut.2016.01.008)  | US | Head-to-head intervention | 41 (84)  | 45 (9)  | 5  | 37 (5) | Other focus: no<br>Inclusion criteria: no<br>Comorbidity: other | I1: A behavioral weight loss program<br>I2: Emotional Brain Training, EBT | DH; Prog. ADH;<br>PA; BMI; Wt;<br>SBP; DBP; DEPR;<br>S     |
| Webber, K. H. 2018<br>(DOI NOT FOUND)              | US | Head-to-head intervention | 23 (69)  | 53 (11) | 13 | 36 (4) | Other focus: no<br>Inclusion criteria: no<br>Comorbidity: other | I1: Stress reduction and intuitive eating<br>I2: Emotional brain training | DH; Prog. ADH;<br>Wt; SBP; DBP;<br>DEPR; S                 |
| Webber, K. H. 2010<br>(10.1016/j.jneb.2009.03.001) | US | Head-to-head intervention | 66 (100) | 50 (10) | 4  | 31 (4) | Other focus: no<br>Inclusion criteria: no<br>Comorbidity: other | I1: Received Minimal intervention<br>I2: Received Enhanced intervention   | PA; PAEE; Wt                                               |
| Yang, Z. 2016<br>(10.1002/oby.21527)               | CN | Head-to-head intervention | 300 (80) | 49 (7)  | 6  | 28 (2) | Other focus: no<br>Inclusion criteria: no<br>Comorbidity: other | I1: control group-Nutrition Education<br>I2: Intervention group           | BMI; Wt; WC;<br>SBP; DBP                                   |

|                                                      |    |                            |           |         |    |        |                                                                 |                                                                                                                                                                                                                            |                                                                  |
|------------------------------------------------------|----|----------------------------|-----------|---------|----|--------|-----------------------------------------------------------------|----------------------------------------------------------------------------------------------------------------------------------------------------------------------------------------------------------------------------|------------------------------------------------------------------|
| Yin, Z. 2018<br>(10.1093/inthealth/ihx072)           | CN | Head-to-head intervention  | 184 (100) | 52 (7)  | 6  | 27 (3) | Other focus: no<br>Inclusion criteria: no<br>Comorbidity: other | I1: comparison group<br>I2: PATH                                                                                                                                                                                           | DH; PA; BMI;<br>Wt; WC                                           |
| Simpson, S. A. 2015<br>(10.3310/hta19500)            | GB | Intervention vs usual care | 144 (85)  | 0 (0)   | 12 | 34 (6) | Other focus: no<br>Inclusion criteria: no<br>Comorbidity: other | I1: Usual care<br>I2: Less intensive intervention<br>I3: Intensive intervention                                                                                                                                            | DH; F consum.;<br>Fb consum.; PA;<br>WHR; BMI; Wt;<br>WC; QoL    |
| Jackson, J. B. 2018<br>(10.1037/ccp0000313)          | IT | Head-to-head intervention  | 60 (100)  | 46 (11) | 7  | 40 (3) | Other focus: no<br>Inclusion criteria: no<br>Comorbidity: other | I1: Brief strategic therapy<br>I2: Cognitive-behavioral therapy                                                                                                                                                            | Wt                                                               |
| Jakicic, J. M. 2015<br>(10.1249/mss.000000000000482) | US | Head-to-head intervention  | 170 (80)  | 43 (9)  | 18 | 33 (0) | Other focus: no<br>Inclusion criteria: no<br>Comorbidity: other | I1: standard behavior weight loss interventions<br>I2: additional strategies at the initiation of the intervention (ADOPT)<br>I3: the additional strategies at predetermined times over the intervention period (MAINTAIN) | DH; F consum.;<br>CHO; PA; BF;<br>BMI; Wt; WC                    |
| Jakicic, J. M. 2014<br>(10.1002/oby.20830)           | US | Head-to-head intervention  | 300 (83)  | 42 (9)  | 18 | 33 (4) | Other focus: no<br>Inclusion criteria: no<br>Comorbidity: other | I1: standard behavioral weight loss intervention<br>I2: stepped-care intervention                                                                                                                                          | DH; F consum.;<br>CHO; PA; PAEE;<br>BF; BMI; Wt;<br>WC; SBP; DBP |



|                                                             |    |                            |          |         |   |        |                                                                   |                                                                                                  |                                                                           |
|-------------------------------------------------------------|----|----------------------------|----------|---------|---|--------|-------------------------------------------------------------------|--------------------------------------------------------------------------------------------------|---------------------------------------------------------------------------|
| Jenkins, D. J. A. 2017<br>(10.1016/j.jacc.2016.10.089)      | CA | Intervention vs usual care | 710 (77) | 45 (12) | 6 | 32 (5) | Other focus: no<br>Inclusion criteria: no<br>Comorbidity: other   | I1: Usual care<br>I2: Advice<br>I3: Food<br>I4: Advice & Food                                    | F consum.; CHO;<br>Fb consum.; FV<br>consum.; BMI;<br>Wt; WC; SBP;<br>DBP |
| Jensen, P. 2013<br>(10.1001/jamadermatol.2013.722.)         | DK | Head-to-head intervention  | 28 (47)  | 51 (10) | 4 | 34 (5) | Other focus: yes<br>Inclusion criteria: yes<br>Comorbidity: other | I1: conventional diet programma<br>I2: Intensive weight loss therapy (the LED group)             | BMI; Wt; WC                                                               |
| Johnson, K. E. 2018<br>(10.1089/tmj.2018.0002)              | US | Intervention vs usual care | nr       | 45 (16) | 3 | 35 (6) | Other focus: no<br>Inclusion criteria: no<br>Comorbidity: other   | I1: Usual care<br>I2: Control - In-Person Coaching Group<br>I3: Videoconferencing Coaching Group | TS; BMI; Wt;<br>SBP; DBP                                                  |
| Hagberg, L. A. 2014<br>(10.1186/1471-2458-14-38)            | SE | Intervention vs usual care | 62 (91)  | 33 (4)  | 3 | 30 (3) | Other focus: no<br>Inclusion criteria: no<br>Comorbidity: other   | I1: Usual care<br>I2: Diet group<br>I3: Exercise group<br>I4: Diet & exercise group              | TS; REE; PA;<br>PAEE; BF; BMI;<br>Wt                                      |
| Seligman, B. G. S. 2011<br>(10.1016/j.metabol.2011.05.006.) | BR | Intervention vs usual care | 26 (35)  | 43 (8)  | 3 | 35 (1) | Other focus: no<br>Inclusion criteria: no<br>Comorbidity: other   | I1: Usual care<br>I2: Healthy Diet Step Counter<br>I3: Healthy Diet Fitness                      | BMI; Wt; WC;<br>SBP; DBP                                                  |
| Sellman, D. 2017 (DOI NOT FOUND)                            | NZ | Head-to-head intervention  | 91 (84)  | 44 (11) | 3 | 41 (7) | Other focus: no<br>Inclusion criteria: no<br>Comorbidity: other   | I1: Green Prescription + Kia Akina<br>I2: Green Prescription                                     | Copg. DIS; PPR;<br>PA; Wt; QoL                                            |

|                                                         |    |                            |          |         |    |        |                                                                   |                                                                                                                 |                                |
|---------------------------------------------------------|----|----------------------------|----------|---------|----|--------|-------------------------------------------------------------------|-----------------------------------------------------------------------------------------------------------------|--------------------------------|
| Set, T. 2017 (DOI NOT FOUND)                            | TR | Head-to-head intervention  | 94 (100) | 37 (9)  | 6  | 34 (4) | Other focus: no<br>Inclusion criteria: no<br>Comorbidity: other   | I1: Control group<br>I2: small group training                                                                   | BF; BMI; Wt; WC                |
| Tzvetanov, I. 2014 (10.1016/j.transproced.2014.05.085.) | US | Intervention vs usual care | 10 (59)  | 46 (14) | 12 | 39 (6) | Other focus: yes<br>Inclusion criteria: yes<br>Comorbidity: other | I1: Usual care<br>I2: multidisciplinary rehabilitation program                                                  | Prog. ADH; BMI                 |
| Wachsberg, K. N. 2014 (10.1002/jhm.2215)                | US | Intervention vs usual care | 114 (65) | 49 (10) | 6  | 38 (5) | Other focus: yes<br>Inclusion criteria: no<br>Comorbidity: other  | I1: Usual care<br>I2: Inpatient Obesity Intervention With Post discharge Telephone follow up                    | WM; Wt                         |
| Wright, N. 2017 (10.1038/nutd.2017.3)                   | NZ | Intervention vs usual care | 39 (60)  | 56 (10) | 3  | 34 (2) | Other focus: no<br>Inclusion criteria: no<br>Comorbidity: other   | I1: Usual care<br>I2: Non-restricted whole food plant-based diet                                                | SE; ESES; PA; BMI; Wt; WC; QoL |
| Yardley, L. 2014 (10.1186/1479-5868-11-67)              | GB | Intervention vs usual care | 118 (66) | 51 (13) | 6  | 36 (6) | Other focus: no<br>Inclusion criteria: no<br>Comorbidity: other   | I1: Usual care<br>I2: Web-based<br>I3: Web-based + basic nurse support<br>I4: Web-based + regular nurse support | Wt                             |
| Azar, K. M. 2015 (10.1007/s13142-014-0296-6)            | US | Intervention vs usual care | 0 (0)    | 45 (10) | 3  | 35 (3) | Other focus: no<br>Inclusion criteria: no<br>Comorbidity: other   | I1: Usual care<br>I2: Intervention Group                                                                        | BMI; Wt                        |
| Beavers, K. M. 2014 (10.1002/oby.20607)                 | US | Head-to-head intervention  | 67 (23)  | 67 (5)  | 18 | 33 (4) | Other focus: no<br>Inclusion criteria: no<br>Comorbidity: other   | I1: PA+WL<br>I2: PA-only<br>I3: SA                                                                              | PA; BF; BMI; Wt                |

|                                                              |    |                            |           |         |     |        |                                                                   |                                                                                |                                                            |
|--------------------------------------------------------------|----|----------------------------|-----------|---------|-----|--------|-------------------------------------------------------------------|--------------------------------------------------------------------------------|------------------------------------------------------------|
| Biddle, S. J. 2015<br>(10.1371/journal.pone.0143398)         | GB | Intervention vs usual care | 128 (69)  | 33 (6)  | 1,5 | 35 (5) | Other focus: yes<br>Inclusion criteria: yes<br>Comorbidity: other | I1: Usual care<br>I2: Intervention group                                       | PA; ACM; BMI; Wt; WC; SBP; DBP; QoL; DEPR                  |
| Burke, L. E. 2015<br>(10.1002/oby.21238)                     | US | Intervention vs usual care | 108 (83)  | 53 (10) | 18  | 33 (4) | Other focus: no<br>Inclusion criteria: no<br>Comorbidity: other   | I1: Usual care<br>I2: Self efficacy+ standard behavioral weight loss treatment | ESE; DH; F consum.; PA; Wt; QoL                            |
| Carter, M. C. 2017<br>(10.2196/mhealth.4520)                 | GB | Head-to-head intervention  | 99 (77)   | 42 (9)  | 6   | 34 (5) | Other focus: no<br>Inclusion criteria: no<br>Comorbidity: other   | I1: Smartphone<br>I2: WLR website<br>I3: Paper food diary                      | Prog. ADH; BF; BMI; Wt                                     |
| Fernandes, J. F. 2015<br>(10.1017/s0007114515004018)         | BR | Intervention vs usual care | 18 (62)   | 42 (9)  | 4   | 35 (3) | Other focus: no<br>Inclusion criteria: no<br>Comorbidity: other   | I1: Usual care<br>I2: Energy restriction group                                 | DH; PA; BMI; Wt; WC; SBP; DBD                              |
| Finkelstein, E. A. 2017<br>(10.1016/j.socscimed.2017.05.030) | SG | Head-to-head intervention  | 90 (56)   | 44 (10) | 4   | 30 (3) | Other focus: no<br>Inclusion criteria: no<br>Comorbidity: other   | I1: Control arm<br>I2: Reward arm                                              | DH; TS; Wt                                                 |
| Fukuoka, Y. 2015<br>(10.1016/j.amepre.2015.01.003)           | US | Intervention vs usual care | 47 (77)   | 55 (9)  | 5   | 33 (6) | Other focus: no<br>Inclusion criteria: no<br>Comorbidity: other   | I1: Usual care<br>I2: Mobile phone intervention                                | ESES; SS; DH; PA; TS; BMI; Wt; SBP; DBP; DEPR              |
| Greaney, M. L. 2017<br>(10.1186/s12966-017-0596-6.)          | US | Intervention vs usual care | 194 (100) | 36 (5)  | 12  | 30 (3) | Other focus: no<br>Inclusion criteria: no<br>Comorbidity: other   | I1: Usual care<br>I2: Shape group                                              | ACM                                                        |
| Greaves, C. 2015<br>(10.1186/s12966-014-0159-z)              | GB | Intervention vs usual care | 33 (30)   | 65 (7)  | 12  | 33 (3) | Other focus: no<br>Inclusion criteria: no<br>Comorbidity: other   | I1: Usual care<br>I2: Waste the Waist programme group                          | DH; ACM; TS; PAI; ST; BMI; Wt; WC; SBP; DBP; QoL           |
| Harrigan, M. 2016<br>(10.1200/JCO.2015.61.6375)              | US | Intervention vs usual care | 100 (100) | 59 (8)  | 6   | 33 (7) | Other focus: yes<br>Inclusion criteria: yes<br>Comorbidity: other | I1: Usual care<br>I2: In Person<br>I3: Telephone                               | F consum.; Fb consum.; FV consum.; TS; PAI; HS; BF; Wt; WC |

|                                                                      |    |                                  |           |            |    |        |                                                                   |                                                                                                                                                   |                                                |
|----------------------------------------------------------------------|----|----------------------------------|-----------|------------|----|--------|-------------------------------------------------------------------|---------------------------------------------------------------------------------------------------------------------------------------------------|------------------------------------------------|
| Herring, S. J. 2014<br>(10.1016/j.jneb.2014.06.002)                  | US | Intervention<br>vs usual care    | 18 (100)  | 24 (5)     | 3  | 37 (6) | Other focus: no<br>Inclusion criteria: no<br>Comorbidity: other   | I1: Usual care<br>I2: Technology-<br>based intervention                                                                                           | Wt                                             |
| Hosseini-Amiri, M.<br>2018<br>(10.4103/ijnmr.IJNMR<br>_141_17)       | IR | Intervention<br>vs usual care    | 0 (0)     | 23 (2)     | nr | 32 (3) | Other focus: no<br>Inclusion criteria: no<br>Comorbidity: other   | I1: Usual care<br>I2: Obesity<br>management                                                                                                       | SE; KNWL; BMI;<br>Wt                           |
| Hunt, K. 2014<br>(10.1016/s0140-<br>6736(13)62420-4)                 | GB | Intervention<br>vs usual care    | 0 (0)     | 47 (8)     | 3  | 35 (5) | Other focus: no<br>Inclusion criteria: no<br>Comorbidity: other   | I1: Usual care<br>I2: Football Fans in<br>Training                                                                                                | DH; PA; BMI;<br>Wt; WC; SBP;<br>DBP; QoL; DEPR |
| Dassen, F. C. M. 2018<br>(10.1016/j.appet.2017<br>.05.009)           | NL | Head-to-<br>head<br>intervention | 68 (75)   | 48<br>(11) | 1  | 31 (4) | Other focus: no<br>Inclusion criteria: no<br>Comorbidity: other   | I1: Control<br>condition<br>I2: Experimental<br>condition                                                                                         | SE; DH; BMI                                    |
| Freitas, Patricia Duarte<br>2018<br>(10.1164/rccm.201603<br>-0446OC) | BR | Head-to-<br>head<br>intervention | 50 (98)   | 47 (9)     | 3  | 38 (2) | Other focus: yes<br>Inclusion criteria: yes<br>Comorbidity: other | I1: WL + Sham<br>exercise group<br>I2: WL + Exercise<br>group                                                                                     | ACM; BMI; Wt;<br>WC; DEPR; ANX                 |
| Gold, B. C. 2007<br>(10.1038/oby.2007.52<br>0.)                      | US | Head-to-<br>head<br>intervention | 101 (81)  | 48<br>(10) | 12 | 32 (4) | Other focus: no<br>Inclusion criteria: no<br>Comorbidity: other   | I1: eDiets.com<br>I2: VTrim                                                                                                                       | SS; DH; Wt                                     |
| Gorin, A. A. 2018<br>(10.1002/oby.22098. )                           | US | Intervention<br>vs usual care    | 89 (69)   | 53<br>(11) | 6  | 34 (4) | Other focus: no<br>Inclusion criteria: no<br>Comorbidity: other   | I1: Usual care<br>I2: Weight<br>Watchers                                                                                                          | Wt                                             |
| Carnie, A. 2013<br>(10.1038/nutd.2013.3<br>9)                        | US | Head-to-<br>head<br>intervention | 199 (100) | 46 (6)     | 6  | 34 (4) | Other focus: no<br>Inclusion criteria: no<br>Comorbidity: other   | I1: internet<br>wellness<br>information<br>combined with<br>nutritioneducation<br>group sessions<br>I2: internet<br>wellness<br>information alone | PA; HS; BF; Wt;<br>WC                          |

|                                                        |    |                            |          |         |    |        |                                                                   |                                                                                         |                                                                       |
|--------------------------------------------------------|----|----------------------------|----------|---------|----|--------|-------------------------------------------------------------------|-----------------------------------------------------------------------------------------|-----------------------------------------------------------------------|
| Chang, S. H. 2016<br>(10.1111/jocn.13301.)             | TW | Head-to-head intervention  | 61 (45)  | 55 (14) | 6  | 30 (3) | Other focus: yes<br>Inclusion criteria: yes<br>Comorbidity: other | I1: The southern district control group<br>I2: The northern district intervention group | BMI; Wt; WC; SBP; DBP                                                 |
| Coles, L. T. 2014<br>(10.1186/1479-5868-11-64)         | AU | Head-to-head intervention  | 66 (46)  | 58 (7)  | 12 | 35 (5) | Other focus: no<br>Inclusion criteria: no<br>Comorbidity: other   | I1: no choice group<br>I2: Choice group                                                 | Wt; SBP; DBP                                                          |
| Conroy, M. B. 2014<br>(10.1007/s11606-014-3077-5)      | US | Head-to-head intervention  | 99 (100) | 54 (5)  | 3  | 35 (6) | Other focus: no<br>Inclusion criteria: no<br>Comorbidity: other   | I1: Self-guided<br>I2: Interventionist-led                                              | PA; BMI; Wt; WC; SBP; DBP                                             |
| Volger, S. 2013<br>(10.1038/ijo.2013.91)               | US | Intervention vs usual care | nr       | 52 (12) | 24 | 39 (5) | Other focus: no<br>Inclusion criteria: no<br>Comorbidity: other   | I1: Usual care<br>I2: Brief LC<br>I3: Enhanced Brief LC                                 | DH; F consum.; FV consum.; PA; BMI; Wt                                |
| Williams, A. 2018<br>(10.1097/j.pain.0000000000001198) | AU | Intervention vs usual care | 95 (59)  | 57 (13) | 6  | 32 (4) | Other focus: no<br>Inclusion criteria: no<br>Comorbidity: other   | I1: Usual care<br>I2: healthy lifestyle intervention                                    | copg. DIS; SQ; PD; PI; FV consum.; PA; BMI; Wt; WC; QoL; DEPR; S; ANX |
| Yee, C. H. 2015<br>(10.4111/kju.2015.56.3.240)         | CN | Head-to-head intervention  | 0 (0)    | 65 (7)  | 11 | 27 (2) | Other focus: yes<br>Inclusion criteria: yes<br>Comorbidity: other | I1: weight reduction advice<br>I2: comprehensive weight reduction program               | BMI; QoL                                                              |
| Block, G. 2015<br>(10.2196/jmir.4897)                  | US | Intervention vs usual care | 106 (31) | 55 (9)  | 3  | 31 (4) | Other focus: no<br>Inclusion criteria: no<br>Comorbidity: other   | I1: Usual care<br>I2: Behavioral intervention                                           | CHO; FV consum.; PA; BMI; Wt; WC                                      |
| Yamauchi, K. 2014<br>(10.1186/1475-2891-13-108)        | JP | Intervention vs usual care | 9 (50)   | 57 (11) | 3  | 28 (3) | Other focus: yes<br>Inclusion criteria: yes<br>Comorbidity: other | I1: Usual care<br>I2: Intervention group                                                | DH; BMI; Wt; WC; SBP; DBP; QoL                                        |

|                                                          |    |                            |           |         |     |        |                                                                 |                                                                                           |                                              |
|----------------------------------------------------------|----|----------------------------|-----------|---------|-----|--------|-----------------------------------------------------------------|-------------------------------------------------------------------------------------------|----------------------------------------------|
| Carpenter, K. M. 2017<br>(10.1080/08964289.2017.1384359) | US | Head-to-head intervention  | 69 (92)   | 47 (10) | 6   | 32 (2) | Other focus: no<br>Inclusion criteria: no<br>Comorbidity: other | I1: Weight TalkTM (WT)<br>I2: Mind Your Weight (MYW)                                      | SE; DH; ME; Wt; QoL; S; AN                   |
| Dutton, G. R. 2014<br>(10.1186/s12966-014-0123-y)        | US | Head-to-head intervention  | 57 (86)   | 50 (11) | 12  | 37 (6) | Other focus: no<br>Inclusion criteria: no<br>Comorbidity: other | I1: Small treatment group<br>I2: Large treatment group                                    | SM DI; Wt                                    |
| Yancy, W. S., Jr. 2015<br>(10.7326/m14-2358)             | US | Head-to-head intervention  | 56 (27)   | 55 (11) | 12  | 36 (6) | Other focus: no<br>Inclusion criteria: no<br>Comorbidity: other | I1: Comparator arm<br>I2: Choice arm                                                      | KNWL; DH; Prog. ADH; ADH D; PA; BMI; WC; QoL |
| Ashwell, M. 2014<br>(10.1159/000369193)                  | GB | Head-to-head intervention  | 180 (100) | 38 (7)  | 5,5 | 31 (4) | Other focus: no<br>Inclusion criteria: no<br>Comorbidity: other | I1: Standardised Web-Based Programme<br>I2: Interactive website with ready to eat cereals | Prog. ADH; BMI; Wt; WC                       |
| Crane, M. M. 2015<br>(10.1002/oby.21265)                 | US | Intervention vs usual care | 0 (0)     | 44 (11) | 6   | 31 (4) | Other focus: no<br>Inclusion criteria: no<br>Comorbidity: other | I1: Usual care<br>I2: Internet-delivered Rethinking Eating and FITness                    | ESES; ESE; DH; SM Wt; REE; WM; Wt; WC        |
| Dunn, C. 2016<br>(10.1002/oby.21315)                     | US | Intervention vs usual care | 54 (68)   | 48 (10) | 6   | 35 (8) | Other focus: no<br>Inclusion criteria: no<br>Comorbidity: other | I1: Usual care<br>I2: Eat Smart, Move More, Weigh Less Online                             | DH; PA; BMI; Wt                              |
| Aveyard, P. 2016<br>(10.1016/s0140-6736(16)31893-1)      | GB | Intervention vs usual care | 1076 (57) | 56 (16) | 3   | 35 (5) | Other focus: no<br>Inclusion criteria: no<br>Comorbidity: other | I1: Usual care<br>I2: Advice plus weight loss programme group                             | Wt                                           |

|                                                               |    |                            |          |         |   |         |                                                                 |                                                                                                                                                         |                                   |
|---------------------------------------------------------------|----|----------------------------|----------|---------|---|---------|-----------------------------------------------------------------|---------------------------------------------------------------------------------------------------------------------------------------------------------|-----------------------------------|
| Borkoles, E. 2016<br>(10.1016/j.maturitas.2015.09.010)        | GB | Intervention vs usual care | nr       | 40 (8)  | 3 | 39 (8)  | Other focus: no<br>Inclusion criteria: no<br>Comorbidity: other | I1: Usual care<br>I2: Initial intervention group                                                                                                        | SE; Wt                            |
| White, M. A. 2017<br>(10.1177/1359105317701560)               | US | Head-to-head intervention  | 39 (72)  | 46 (11) | 3 | 33 (6)  | Other focus: no<br>Inclusion criteria: no<br>Comorbidity: other | I1: Internet-administered smoking cessation treatment with health education<br>I2: Internet-administered smoking cessation plus CBT for weight concerns | BMI; Wt                           |
| Barnes, R. D. 2014<br>(10.1002/oby.20889)                     | US | Intervention vs usual care | 68 (76)  | 48 (11) | 3 | 35 (7)  | Other focus: no<br>Inclusion criteria: no<br>Comorbidity: other | I1: Usual care<br>I2: Motivational Interviewing<br>I3: Nutrition Psychoeducation                                                                        | SE; copg. DIS; Wt; SBP; DBP; DEPR |
| Cadmus-Bertram, L. A. 2015<br>(10.1016/j.amepre.2015.01.020.) | US | Head-to-head intervention  | 51 (100) | 60 (7)  | 4 | 29 (4)  | Other focus: no<br>Inclusion criteria: no<br>Comorbidity: other | I1: Web-Based Tracking Group<br>I2: Pedometer Group                                                                                                     | PA; TS; Wt                        |
| Carels, R. A. 2014<br>(10.1177/1359105312470156)              | US | Head-to-head intervention  | 46 (78)  | 44 (13) | 3 | 40 (10) | Other focus: no<br>Inclusion criteria: no<br>Comorbidity: other | I1: Transforming your life<br>I2: New perspectives                                                                                                      | Copg. DIS; Wt                     |
| Christaki, E. 2013<br>(10.1111/jhn.12086)                     | GR | Intervention vs usual care | 34 (100) | 47 (12) | 2 | 38 (7)  | Other focus: no<br>Inclusion criteria: no<br>Comorbidity: other | I1: Usual care<br>I2: Intervention group                                                                                                                | SE; copg. DIS; DH; BMI; Wt; S     |
| Grossman, J. A. 2018<br>(10.1097/gme.0000000000001013)        | US | Head-to-head intervention  | 11 (100) | 59 (5)  | 4 | 32 (3)  | Other focus: no<br>Inclusion criteria: no<br>Comorbidity: other | I1: Endurance group<br>I2: High-intensity interval training                                                                                             | DH; ADH measure; WM; BMI; Wt; WC  |

|                                                       |    |                            |          |         |    |        |                                                                   |                                                                                            |                          |
|-------------------------------------------------------|----|----------------------------|----------|---------|----|--------|-------------------------------------------------------------------|--------------------------------------------------------------------------------------------|--------------------------|
| Huber, J. M. 2015<br>(10.1186/s13063-015-0880-1)      | US | Intervention vs usual care | 67 (74)  | 48 (13) | 3  | 36 (4) | Other focus: no<br>Inclusion criteria: no<br>Comorbidity: other   | I1: Usual care<br>I2: Telecoaching plus a portion control plate for weight care management | EE; DH; PA; BMI; Wt; WC  |
| Ingraham, N. 2017<br>(10.1177/1524839916670874)       | US | Intervention vs usual care | 80 (100) | 53 (0)  | 3  | 0 (0)  | Other focus: no<br>Inclusion criteria: no<br>Comorbidity: other   | I1: Usual care<br>I2: Women's Health and Mindfulness (WHAM)                                | DH; ME; PA; QoL          |
| Haggerty, A. F. 2016<br>(10.1016/j.ygyno.2015.11.033) | US | Head-to-head intervention  | 20 (100) | 60 (7)  | 6  | 36 (6) | Other focus: yes<br>Inclusion criteria: yes<br>Comorbidity: other | I1: Telemedicine<br>I2: Text4Diet                                                          | Wt                       |
| Halperin, D. T. 2018<br>(10.1016/j.jneb.2018.07.014)  | PR | Intervention vs usual care | 29 (76)  | 0 (0)   | 2  | 31 (4) | Other focus: no<br>Inclusion criteria: no<br>Comorbidity: other   | I1: Usual care<br>I2: Social support educational sessions                                  | SS; DH; PA; BMI; S       |
| Helena, I. 2013<br>(10.1007/s11325-013-0929-x.)       | SE | Intervention vs usual care | 15 (21)  | 55 (12) | 6  | 35 (5) | Other focus: yes<br>Inclusion criteria: yes<br>Comorbidity: other | I1: Usual care<br>I2: Tailored behavioral medicine intervention                            | DH; ACM; TS; BMI; Wt; WC |
| Katula, J. A. 2011<br>(10.2337/dc10-2115)             | US | Intervention vs usual care | 128 (43) | 58 (10) | 12 | 33 (4) | Other focus: no<br>Inclusion criteria: no<br>Comorbidity: other   | I1: Usual care<br>I2: Lifestyle weight loss intervention                                   | BMI; Wt; WC; SBP; DBP    |
| Kesman, R. L. 2011<br>(10.1186/1756-0500-4-346)       | US | Intervention vs usual care | 40 (62)  | 56 (10) | 6  | 0 (0)  | Other focus: no<br>Inclusion criteria: no<br>Comorbidity: other   | I1: Usual care<br>I2: Portion control                                                      | WM                       |
| Kim, J. Y. 2015<br>(10.2196/mhealth.3949)             | KR | Head-to-head intervention  | 0 (0)    | 41 (7)  | 6  | 28 (2) | Other focus: no<br>Inclusion criteria: no<br>Comorbidity: other   | I1: Control<br>I2: Tailored text-messaging                                                 | PA; Wt; QoL              |



|                                                             |    |                            |           |         |    |        |                                                                 |                                                                                                                                                                 |                                      |
|-------------------------------------------------------------|----|----------------------------|-----------|---------|----|--------|-----------------------------------------------------------------|-----------------------------------------------------------------------------------------------------------------------------------------------------------------|--------------------------------------|
| Koniak-Griffin, D. 2015<br>(10.1016/j.ijnurstu.2014.09.005) | US | Intervention vs usual care | 223 (100) | 45 (8)  | 6  | 33 (6) | Other focus: no<br>Inclusion criteria: no<br>Comorbidity: other | I1: Usual care<br>I2: Behavioral intervention                                                                                                                   | DH; ACM; BMI;<br>Wt; WC; SBP;<br>DBP |
| Laing, B. Y. 2014<br>(10.7326/m13-3005)                     | US | Intervention vs usual care | 155 (73)  | 43 (14) | 6  | 33 (7) | Other focus: no<br>Inclusion criteria: no<br>Comorbidity: other | I1: Usual care<br>I2: MyfitnessPal app                                                                                                                          | SE; ESE; DH; PA;<br>Wt; SBP          |
| LaRose, J. G. 2017<br>(10.1177/1359105316688951)            | US | Head-to-head intervention  | 41 (78)   | 22 (2)  | 3  | 34 (6) | Other focus: no<br>Inclusion criteria: no<br>Comorbidity: other | I1: Face-to-face behavioral weight loss<br>I2: Web-based behavioral weight loss<br>I3: Hybrid-format behavioral weight loss (Hybrid)                            | Prog. ADH; BMI;<br>Wt                |
| Leahey, T. M. 2015<br>(10.1002/oby.20937)                   | US | Head-to-head intervention  | 221 (83)  | 46 (11) | 3  | 34 (6) | Other focus: no<br>Inclusion criteria: no<br>Comorbidity: other | I1: SURI + internet behavioral weight loss<br>I2: SURI + internet behavioral + financial incentives<br>I3: SURI + internet behavioral + optional group sessions | Prog. ADH; Wt                        |
| Lin, P. H. 2014<br>(10.1002/oby.20686)                      | CN | Intervention vs usual care | 74 (60)   | 38 (8)  | 6  | 28 (4) | Other focus: no<br>Inclusion criteria: no<br>Comorbidity: other | I1: Usual care<br>I2: Text-messages                                                                                                                             | BMI; Wt; WC                          |
| Liu, J. 2018<br>(10.1016/j.ypped.2018.07.015)               | US | Head-to-head intervention  | 178 (68)  | 52 (10) | 20 | 0 (0)  | Other focus: no<br>Inclusion criteria: no<br>Comorbidity: other | I1: enhanced usual care<br>I2: stepped down approach                                                                                                            | BMI; Wt; SBP;<br>DM                  |

|                                                    |    |                               |           |            |     |        |                                                                 |                                                                                                                        |                                                      |
|----------------------------------------------------|----|-------------------------------|-----------|------------|-----|--------|-----------------------------------------------------------------|------------------------------------------------------------------------------------------------------------------------|------------------------------------------------------|
| Madigan, C. D. 2014<br>(10.1186/s12966-014-0125-9) | GB | Intervention<br>vs usual care | 116 (63)  | 54<br>(15) | 3   | 36 (5) | Other focus: no<br>Inclusion criteria: no<br>Comorbidity: other | I1: Usual care<br>I2: Self-weighting                                                                                   | PA; Wt                                               |
| Manini, T. M. 2014<br>(10.1093/gerona/gls337)      | US | Head-to-head<br>intervention  | 27 (100)  | 64 (6)     | 6   | 36 (6) | Other focus: no<br>Inclusion criteria: no<br>Comorbidity: other | I1: Dietary<br>restriction +<br>exercise<br>intervention<br>I2: health<br>educational<br>control group                 | PA; Wt; QoL                                          |
| Manini, T. M. 2010<br>(10.1038/oby.2009.317.)      | US | Head-to-head<br>intervention  | 122 (68)  | 76 (4)     | 12  | 36 (5) | Other focus: no<br>Inclusion criteria: no<br>Comorbidity: other | I1: Successful<br>aging<br>I2: Physical activity                                                                       | PA; BMI; Wt                                          |
| Mantzios, M. 2014<br>(10.1111/aphw.12023)          | GR | Head-to-head<br>intervention  | 65 (38)   | 23 (4)     | 1,5 | 29 (2) | Other focus: no<br>Inclusion criteria: no<br>Comorbidity: other | I1: Individual<br>setting<br>I2: Group setting                                                                         | BMI; Wt                                              |
| Marcon, E. R. 2017<br>(10.1007/s11695-016-2365-z.) | BR | Intervention<br>vs usual care | 51 (77)   | 45 (3)     | 4   | 48 (8) | Other focus: no<br>Inclusion criteria: no<br>Comorbidity: other | I1: Usual care<br>I2: NOT -SMI:<br>Supervised<br>Exercise<br>I3: Exercise +<br>cognitive<br>behavioral therapy         | PA; HR MON;<br>Wt; SBP; DBP                          |
| Martin, C. K. 2015<br>(10.1002/oby.21063)          | US | Head-to-head<br>intervention  | 33 (83)   | 44 (2)     | 3   | 30 (3) | Other focus: no<br>Inclusion criteria: no<br>Comorbidity: other | I1: Control (head<br>education)<br>I2: SmartLoss                                                                       | Wt; WC; SBP;<br>DBP                                  |
| Mason, C. 2013<br>(10.1158/1055-9965.EPI-13-0337.) | US | Intervention<br>vs usual care | 439 (100) | 58 (5)     | 12  | 31 (4) | Other focus: no<br>Inclusion criteria: no<br>Comorbidity: other | I1: Usual care<br>I2: dietary weight<br>loss<br>I3: moderate-to-<br>vigorous intensity<br>aerobic exercise<br>I4: both | SS; F consum.;<br>PA; TS; BF; BMI;<br>Wt; WC; QoL; S |

|                                                      |    |                                   |           |            |     |        |                                                                 | interventions<br>combined                                                                                                       |                                                                 |
|------------------------------------------------------|----|-----------------------------------|-----------|------------|-----|--------|-----------------------------------------------------------------|---------------------------------------------------------------------------------------------------------------------------------|-----------------------------------------------------------------|
| Mirkarimi, K. 2015<br>(10.5812/ircmj.23492v<br>2)    | IR | Intervention<br>vs usual care     | 150 (100) | 38 (9)     | 0,5 | 29 (2) | Other focus: no<br>Inclusion criteria: no<br>Comorbidity: other | I1: Usual care<br>I2: Motivational<br>interviewing<br>I3: Motivational<br>interviewing and<br>intention<br>intervention         | BMI; Wt                                                         |
| Moss, J. 2014<br>(10.1155/2014/10216<br>4)           | GB | Intervention<br>vs usual care     | nr        | 0 (0)      | 3   | 39 (7) | Other focus: no<br>Inclusion criteria: no<br>Comorbidity: other | I1: Usual care<br>I2: Pragmatic<br>lifestyle<br>intervention                                                                    | HR MON; BMI;<br>Wt; WC; SBP;<br>DBP; QoL                        |
| Newton, R. L., Jr. 2018<br>(10.2196/jmir.9816)       | US | Intervention<br>vs usual<br>care* | 97 (92)   | 56<br>(10) | 6   | 39 (6) | Other focus: no<br>Inclusion criteria: no<br>Comorbidity: other | I1: Usual care<br>I2: Community<br>health coaches                                                                               | DH; F consum.;<br>PA; WM; SBP;<br>DBP; QoL                      |
| O'Brien, K. M. 2014<br>(10.1186/1475-2891-<br>13-82) | AU | Intervention<br>vs usual care     | 289 (59)  | 42<br>(10) | 3   | 32 (4) | Other focus: no<br>Inclusion criteria: no<br>Comorbidity: other | I1: Usual care<br>I2: basic web-<br>based weight loss<br>intervention<br>I3: enhanced web-<br>based weight loss<br>intervention | DH; F consum.;<br>CHO; Fb<br>consum.; FV<br>consum.; BMI;<br>Wt |
| Olson, R. 2016<br>(10.2105/ajph.2016.30<br>3262)     | US | Intervention<br>vs usual<br>care* | 472 (18)  | 48<br>(11) | 6   | 0 (0)  | Other focus: no<br>Inclusion criteria: no<br>Comorbidity: other | I1: Usual care<br>I2: Safety and<br>Health<br>Involvement for<br>Truckers                                                       | DH; PA; BF; BMI;<br>Wt; WC; SBP;<br>DBP                         |
| Pacanowski, C. R. 2015<br>(10.1155/2015/76368<br>0)  | US | Head-to-<br>head<br>intervention  | 73 (100)  | 47<br>(10) | 3   | 34 (5) | Other focus: no<br>Inclusion criteria: no<br>Comorbidity: other | I1: Control<br>I2: Caloric Titration<br>Method                                                                                  | Wt                                                              |

|                                                        |    |                             |          |         |    |        |                                                                 |                                                                                                                 |                                       |
|--------------------------------------------------------|----|-----------------------------|----------|---------|----|--------|-----------------------------------------------------------------|-----------------------------------------------------------------------------------------------------------------|---------------------------------------|
| Palmeira, L. 2017<br>(10.1016/j.appet.2017.01.027)     | PT | Intervention vs usual care  | 162 (89) | 42 (9)  | 12 | 34 (5) | Other focus: no<br>Inclusion criteria: no<br>Comorbidity: other | I1: Usual care<br>I2: Kg-Free                                                                                   | Copg. DIS; DH;<br>PA; BMI; WC;<br>QoL |
| Parretti, H. M. 2015<br>(10.1002/oby.21167)            | GB | Intervention vs usual care  | 84 (64)  | 57 (10) | 12 | 34 (2) | Other focus: no<br>Inclusion criteria: no<br>Comorbidity: other | I1: Usual care<br>I2: Water preload                                                                             | DH; Prog. ADH;<br>Wt                  |
| Paskett, E. D. 2018<br>(10.1158/1055-9965.Epi-17-1085) | US | Head-to-head intervention * | 666 (71) | 56 (13) | 12 | 33 (6) | Other focus: no<br>Inclusion criteria: no<br>Comorbidity: other | I1: Walk by faith<br>I2: Ribbons of faith                                                                       | DH; PA; Wt; SBP                       |
| Patel, Michele<br>Lanpher 2019<br>(10.2196/12209)      | US | Head-to-head intervention   | 105 (80) | 43 (12) | 3  | 32 (5) | Other focus: no<br>Inclusion criteria: no<br>Comorbidity: other | I1: simultaneous<br>I2: sequential<br>I3: app only                                                              | BMI; Wt                               |
| Pekkarinen, T. 2015<br>(10.1155/2015/651460)           | FI | Head-to-head intervention   | 201 (71) | 47 (10) | 4  | 42 (6) | Other focus: no<br>Inclusion criteria: no<br>Comorbidity: other | I1: 17-week program without maintenance<br>I2: 17-week program with one-year maintenance                        | BMI; Wt; QoL                          |
| Perri, M. G. 2014<br>(10.1002/oby.20832)               | US | Head-to-head intervention   | 612 (78) | 52 (12) | 24 | 36 (4) | Other focus: no<br>Inclusion criteria: no<br>Comorbidity: other | I1: High dose treatment<br>I2: Moderate dose treatment<br>I3: Low dose treatment<br>I4: Education control group | Wt                                    |

1 **Abbreviations country code:** AT: Austria; AU: Australia; BE: Belgium; BR: Brazil; CA: Canada; CH: Switzerland; CL: Chile; CN: China; CU: Cuba; DE: Germany; DK: Denmark; ES: Spain; FI: Finland;  
2 FR: France; GB: United Kingdom of Great Britain; GR: Greece; HK: Hong Kong; HR: Croatia; IE: Ireland; IL: Israel; IN: India; IR: Iran; IT: Italy; JP: Japan; KR: Korea; LV: Latvia; MX: Mexico; MY:  
3 Malaysia; NL: Netherlands; NO: Norway; NZ: New Zealand; PH: Philippines; PR: Puerto Rico; PT: Portugal; SA: Saudi Arabia; SE: Sweden; SG: Singapore; TH: Thailand; TR: Türkiye; TW: Taiwan;  
4 US: United States of America; VN: Viet Nam; ZA: South Africa  
5

6 **Abbreviations outcomes:** SE: Self-efficacy; ESES: Exercise Self-efficacy; ESE: Eating Self-efficacy; BF: Body fat; BMI: Body Mass Index; Wt: Weight; WC: Waist size; SBP: Systolic blood pressure;  
7 DBP: Diastolic blood pressure; QoL: Quality of Life; DEPR: Depression; S: Stresscoping; DIS: Coping with the disease; DH: Dietary habits; F consum.: Consumption of fat; CHO: Carbohydrates;

8 Fb consum.: Fiber consumption; FV consum.: Fruit and vegetable consumption; Prog. ADH: Adherence to programme; MA: Medication adherence; ADH measure: Measure of adherence; SM  
9 DI: Self-Monitoring Dietary Intake; SM Wt: Self-Monitoring Weight; PA: Physical activity; S per D: Steps/Day; TS: Total steps; DM: Diabetes mellitus; SS: Social support; INTEG work: Integration  
10 at work; PPR: Patient-healthcare provider relationship; SDM: share decision making; FFS: Fee-for service and Value-based care; P4C: Pay-for-Coordination; P4P: Pay-for-Performance; B pmt/E-  
11 C pmt: Bundled Payment or Episode-of-Care Payment; BPCI adv + CJR: Advanced model and the Comprehensive Care for Joint Replacement model; SSP: Shared Savings Programs (Upside and  
12 Downside); CDPM tool: A Tool for Strengthening Chronic Disease Prevention and Management Through Dialogue, Planning and Assessment; CE: cost-effectiveness/value for money; KNWL:  
13 Knowledge; HL: Health Literacy; Pat. A: Patient activation; M + RTC: Motivation and readiness to change; SQ: Sleep Quality; SF: Sexual functioning; PD: Pain disability; PI: Pain intensity; CSD  
14 consum.: Consumption of soda pop and soft drinks; ME: Mindful eating; ADH D: Adherence to diet; ADH Ex: Adherence to exercise; ADH LS ADV: Adherence to lifestyle advice; SM PA: Self-  
15 Monitoring Physical Activity; ACM: Accelerometry; HR MON: Heart rate monitoring; REE: Resting Energy Expenditure; PAEE: Physical Activity Energy Expenditure; PAI: Physical Activity Intensity;  
16 ST: Sedentary time; WM: Weight management; WHR: Waist/hip ratio; HS: Hip size; SKF: Skin fold thickness; CMs: Comorbidities; mean AP: Mean arterial pressure; Met S: Metabolic syndrome;  
17 HD: Heart disease; ANX: Anxiety  
18  
19 **Other abbreviations:** nr: not reported
