# Supplementary material for: Self-management interventions for adults living with obesity to improve patient-relevant outcomes: An evidence map
Source: PubMed Central journal article supplement — Patient Educ Couns. 2023 May;110:107647. doi: 10.1016/j.pec.2023.107647 (PMC10109091; doi:10.1016/j.pec.2023.107647), 2023-05
Supplement: mmc6.pdf [file mmc6.pdf]

**Table S5.** Risk of bias of the included studies

| <b>Type of Bias</b>                                           |                | <b>Total<br/>N=497</b> |
|---------------------------------------------------------------|----------------|------------------------|
| Selection bias - Random sequence generation                   | High           | 14 (3%)                |
|                                                               | Low            | 340 (68%)              |
|                                                               | Unclear        | 143 (29%)              |
| Selection bias - Allocation concealment                       | High           | 27 (5%)                |
|                                                               | Low            | 187 (38%)              |
|                                                               | Unclear        | 283 (57%)              |
| Performance bias - Blinding of participants and personnel     | High           | 389 (78%)              |
|                                                               | Low            | 48 (10%)               |
|                                                               | Non-applicable | 40 (8%)                |
|                                                               | Unclear        | 20 (4%)                |
| Detection bias - Blinding of objective outcomes               | High           | 8 (2%)                 |
|                                                               | Low            | 53 (11%)               |
|                                                               | Non-applicable | 434 (88%)              |
|                                                               | Unclear        | 1 (0.2%)               |
| Detection bias - Blinding of objective outcomes with assessor | High           | 321 (65%)              |
|                                                               | Low            | 97 (20%)               |
|                                                               | Non-applicable | 39 (8%)                |
|                                                               | Unclear        | 40 (8%)                |
| Detection bias - Blinding of subjective outcomes              | High           | 233 (47%)              |
|                                                               | Low            | 48 (10%)               |
|                                                               | Non-applicable | 190 (38%)              |
|                                                               | Unclear        | 25 (5%)                |
| Attrition bias - Incomplete outcome data                      | High           | 240 (48%)              |
|                                                               | Low            | 241 (49%)              |
|                                                               | Unclear        | 15 (3%)                |
| Reporting bias - Selective reporting                          | High           | 62 (13%)               |
|                                                               | Low            | 426 (86%)              |
|                                                               | Unclear        | 8 (2%)                 |
| Other bias - Incorrect statistical methods                    | High           | 4 (15%)                |
|                                                               | Low            | 15 (56%)               |
|                                                               | Unclear        | 8 (30%)                |
| Other bias - Recruitment bias                                 | High           | 8 (30%)                |
|                                                               | Low            | 9 (33%)                |
|                                                               | Unclear        | 10 (37%)               |
